# Supplementary material for: The Drosophila Individual Activity Monitoring and Detection System (DIAMonDS)
Source: eLife. 2020 Nov 10;9:e58630. doi: 10.7554/eLife.58630 (PMC7655107; doi:10.7554/eLife.58630)
Supplement: Figure 1—figure supplement 1—source data 1. [file elife-58630-fig1-figsupp1-data1.xlsx]

## Sheet: Fig.1-Sup.1
																Dark condition
	time course								Light condition						n	27	27	27	27	27
		A	B	H	C	D		n	22	22	22	22	22			A	B	C	D	E
	17:00:00	25.1	25.6	25.2	25.1	25.7			A	B	C	D	E			25.2	25.3	25	25.3	25.1
	17:15:00	25.2	25.6	25.2	25.1	25.7			25.1	25.6	25.1	25.7	25.2			25.2	25.3	25	25.3	25.1
	17:30:00	25.2	25.7	25.2	25.1	25.7			25.2	25.6	25.1	25.7	25.2			25.2	25.3	24.9	25.3	25.1
	17:45:00	25.2	25.7	25.2	25.1	25.7			25.2	25.7	25.1	25.7	25.2			25.2	25.3	25	25.3	25.1
	18:00:00	25.3	25.7	25.3	25.1	25.7			25.2	25.7	25.1	25.7	25.2			25.2	25.3	25	25.3	25.1
	18:15:00	25.3	25.7	25.3	25.1	25.7			25.3	25.7	25.1	25.7	25.3			25.2	25.3	25	25.3	25.1
	18:30:00	25.3	25.7	25.3	25.1	25.7			25.3	25.7	25.1	25.7	25.3			25.3	25.3	24.9	25.3	25.1
	18:45:00	25.3	25.7	25.3	25.1	25.7			25.3	25.7	25.1	25.7	25.3			25.2	25.3	24.9	25.3	25.1
	19:00:00	25.3	25.7	25.3	25.1	25.7			25.3	25.7	25.1	25.7	25.3			25.2	25.3	24.9	25.3	25.1
	19:15:00	25.3	25.6	25.3	25.1	25.7			25.2	25.3	24.9	25.3	25.1			25.2	25.3	24.9	25.3	25.1
	19:30:00	25.3	25.6	25.3	25.1	25.7			25.2	25.3	24.9	25.3	25.1			25.2	25.3	24.9	25.3	25.1
	19:45:00	25.3	25.6	25.3	25.1	25.6			25.2	25.3	25	25.3	25.1			25.2	25.3	25	25.3	25.1
	20:00:00	25.3	25.5	25.2	25.1	25.6			25.2	25.4	24.9	25.3	25.1			25.2	25.3	25	25.3	25.1
	20:15:00	25.3	25.4	25.3	25	25.5			25.2	25.4	25	25.4	25.1			25.2	25.3	24.9	25.3	25.1
	20:30:00	25.3	25.4	25.2	25	25.4			25.2	25.4	25	25.4	25.1			25.2	25.3	24.9	25.3	25.1
	20:45:00	25.3	25.4	25.1	25	25.4			25.3	25.5	25	25.4	25.1			25.2	25.3	25	25.3	25.1
	21:00:00	25.3	25.4	25.2	25	25.4			25.3	25.6	25.1	25.5	25.1			25.2	25.3	24.9	25.3	25.1
	21:15:00	25.2	25.3	25.1	25	25.3			25.3	25.6	25.1	25.5	25.2			25.2	25.3	24.9	25.3	25.1
	21:30:00	25.3	25.3	25.1	25	25.3			25.3	25.6	25.1	25.6	25.2			25.2	25.3	24.9	25.3	25.1
	21:45:00	25.2	25.3	25.1	25	25.3			25.3	25.6	25.1	25.6	25.2			25.2	25.3	24.9	25.3	25.1
	22:00:00	25.2	25.3	25.1	24.9	25.3			25.3	25.6	25	25.6	25.2			25.1	25.3	24.9	25.2	25.1
	22:15:00	25.2	25.3	25.1	25	25.3			25.3	25.6	25	25.6	25.2			25.1	25.2	24.9	25.2	25.1
	22:30:00	25.2	25.3	25.1	25	25.3			25.3	25.6	25.1	25.6	25.2			25.1	25.3	25	25.2	25.1
	22:45:00	25.2	25.3	25.1	24.9	25.3										25.2	25.3	25	25.3	25.1
	23:00:00	25.2	25.3	25.1	24.9	25.3										25.2	25.3	24.9	25.3	25.1
	23:15:00	25.2	25.3	25.1	25	25.3										25.2	25.3	25	25.3	25.1
	23:30:00	25.2	25.3	25.1	24.9	25.3										25.2	25.3	25	25.3	25.1
	23:45:00	25.2	25.3	25.1	24.9	25.3
	1900-01-01	25.2	25.3	25.1	25	25.3
	1900-01-01 00:15:00	25.2	25.3	25.1	25	25.3
	1900-01-01 00:30:00	25.2	25.3	25.1	25	25.3
	1900-01-01 00:45:00	25.2	25.3	25.1	24.9	25.3
	1900-01-01 01:00:00	25.2	25.3	25.1	25	25.3
	1900-01-01 01:15:00	25.2	25.3	25.1	25	25.3
	1900-01-01 01:30:00	25.2	25.3	25.1	25	25.3
	1900-01-01 01:45:00	25.3	25.3	25.1	24.9	25.3
	1900-01-01 02:00:00	25.2	25.3	25.1	24.9	25.3
	1900-01-01 02:15:00	25.2	25.3	25.1	24.9	25.3
	1900-01-01 02:30:00	25.2	25.3	25.1	24.9	25.3
	1900-01-01 02:45:00	25.2	25.3	25.1	24.9	25.3
	1900-01-01 03:00:00	25.2	25.3	25.1	25	25.3
	1900-01-01 03:15:00	25.2	25.3	25.1	25	25.3
	1900-01-01 03:30:00	25.2	25.3	25.1	24.9	25.3
	1900-01-01 03:45:00	25.2	25.3	25.1	24.9	25.3
	1900-01-01 04:00:00	25.2	25.3	25.1	25	25.3
	1900-01-01 04:15:00	25.2	25.3	25.1	24.9	25.3
	1900-01-01 04:30:00	25.2	25.3	25.1	24.9	25.3
	1900-01-01 04:45:00	25.2	25.3	25.1	24.9	25.3
	1900-01-01 05:00:00	25.2	25.3	25.1	24.9	25.3
	1900-01-01 05:15:00	25.1	25.3	25.1	24.9	25.2
	1900-01-01 05:30:00	25.1	25.2	25.1	24.9	25.2
	1900-01-01 05:45:00	25.1	25.3	25.1	25	25.2
	1900-01-01 06:00:00	25.2	25.3	25.1	25	25.3
	1900-01-01 06:15:00	25.2	25.3	25.1	24.9	25.3
	1900-01-01 06:30:00	25.2	25.3	25.1	25	25.3
	1900-01-01 06:45:00	25.2	25.3	25.1	25	25.3
	1900-01-01 07:00:00	25.2	25.3	25.1	24.9	25.3
	1900-01-01 07:15:00	25.2	25.3	25.1	24.9	25.3
	1900-01-01 07:30:00	25.2	25.3	25.1	25	25.3
	1900-01-01 07:45:00	25.2	25.4	25.1	24.9	25.3
	1900-01-01 08:00:00	25.2	25.4	25.1	25	25.4
	1900-01-01 08:15:00	25.2	25.4	25.1	25	25.4
	1900-01-01 08:30:00	25.3	25.5	25.1	25	25.4
	1900-01-01 08:45:00	25.3	25.6	25.1	25.1	25.5
	1900-01-01 09:00:00	25.3	25.6	25.2	25.1	25.5
	1900-01-01 09:15:00	25.3	25.6	25.2	25.1	25.6
	1900-01-01 09:30:00	25.3	25.6	25.2	25.1	25.6
	1900-01-01 09:45:00	25.3	25.6	25.2	25	25.6
	1900-01-01 10:00:00	25.3	25.6	25.2	25	25.6
	1900-01-01 10:15:00	25.3	25.6	25.2	25.1	25.6
