# Supplementary material for: The Drosophila Individual Activity Monitoring and Detection System (DIAMonDS)
Source: eLife. 2020 Nov 10;9:e58630. doi: 10.7554/eLife.58630 (PMC7655107; doi:10.7554/eLife.58630)
Supplement: Figure 2—figure supplement 1—source data 1. [file elife-58630-fig2-figsupp1-data1.xlsx]

## Sheet: Fig.2-Sup.1
Fig.2-Sup.1A
	embryo						1st larvae
1st larvae	81.25	85.4167	72.9167	77.0833	81.25	72.9167	100	100	100	100	100	100
puparium	62.5	64.5833	64.5833	70.8333	72.9167	68.75	75	79.1667	91.6667	89.5833	83.3333	85.4167
adult	62.5	58.3333	60.4167	62.5	58.3333	64.5833	66.6667	70.8333	79.1667	83.3333	72.9167	75
Fig.2-Sup.1B
	100 µl media/well						150 µl media/well
3rd larval stage	91.6667	97.9167	93.75	95.8333	79.1667	87.5	90.625	81.25	93.75	90.625	93.75	96.875
pupal stage	89.5833	93.75	83.3333	85.4167	75	81.25	78.125	65.625	71.875	78.125	81.25	87.5
adult	77.0833	79.1667	75	79.1667	70.8333	77.0833	53.125	46.875	53.125	56.25	56.25	68.75
