# Supplementary material for: The Drosophila Individual Activity Monitoring and Detection System (DIAMonDS)
Source: eLife. 2020 Nov 10;9:e58630. doi: 10.7554/eLife.58630 (PMC7655107; doi:10.7554/eLife.58630)
Supplement: Figure 2—figure supplement 3—source data 1. [file elife-58630-fig2-figsupp3-data1.xlsx]

## Sheet: Fig.2-Sup.3A,B
Manual	Sapphire
650	663
670	674
709	708
738	749
742	752
768	770
775	822
787	793
798	804
801	806
803	813
852	940
859	858
872	875
876	825
893	895
896	894
898	899
903	902
910	908
912	917
915	917
917	921
924	925
930	930
931	934
932	941
932	935
933	935
942	947
951	951
954	964
961	960
963	964
968	989
981	982
990	997
998	1003
1011	1014
1015	1016
1018	1112
1019	1025
1021	1029
1022	1023
1045	1044
1061	1062
1064	1065
1069	1067
1101	1100
1108	1113
1124	1124
1133	1137
1140	1137
1141	1141
1144	1143
1150	1149
1164	1167
1164	339
1171	1172
1177	1183
1189	1190
1189	1189
1203	1202
1209	1214
1213	1216
1224	1227
1230	1236
1234	1244
1234	1235
1249	1251
1249	1251
1251	1256
1251	1251
1258	1257
1261	1259
1276	1278
1281	1279
1285	1287
1294	1299
1294	1293
1309	1309
1313	1313
1315	1316
1316	1315
1319	1322
1319	1317
1333	1332
1348	1347
1360	1362
1373	1371
1373	1373
1383	1380
1388	1386
1389	1390
1393	1394
1394	1392
1395	1396
1400	1404
1402	1400
1403	1403
1405	1404
1414	1412
1419	1417
1429	1427
1445	1442
1451	1450
1459	1457
1468	1466
1471	1472
1473	1478
1478	1493
1479	1478
1480	1482
1481	1477
1483	1486
1485	1484
1485	1484
1490	1488
1499	1499
1504	1501
1506	1505
1508	1508
1513	1511
1513	1509
1517	1515
1530	1532
1532	1532
1543	1541
1550	1551
1551	1548
1556	1553
1560	1559
1571	1571
1576	1575
1586	1584
1597	1595
1601	1599
1611	1607
1614	1612
1624	1621
1627	1626
1628	1627
1640	1646
1642	1647
1654	1652
1657	1663
1709	1707
1738	1745
1751	1747
1760	1768
1766	1764
1767	1766
1797	1794
1859	1857
1908	1905
1915	1914
1916	1914
1971	1971
1976	1974
1991	1988
2037	2032
2045	2043
2065	2061
2077	2074
2097	2094
2193	2194
2315	2311
2465	2465
2680	2678

## Sheet: Fig.2-Sup.3C,D
Manually	Sapphire
650	651
670	670
709	710
738	736
742	740
768	779
775	820
787	798
798	807
801	800
803	811
852	943
859	858
872	871
876	823
893	894
896	894
898	899
903	902
910	908
912	946
915	913
917	924
924	922
930	931
931	931
932	931
932	932
933	931
942	941
951	952
954	992
961	960
963	961
968	989
981	983
990	989
998	998
1011	1011
1015	1015
1018	1107
1019	1017
1021	1021
1022	1027
1045	1043
1061	1059
1064	1068
1069	1067
1101	1099
1108	1113
1124	1122
1133	1133
1140	1139
1141	1141
1144	1143
1150	1151
1164	1169
1164	1197
1171	1172
1177	1189
1189	1188
1189	1188
1203	1203
1209	1217
1213	1215
1224	1233
1230	1235
1234	1258
1234	1234
1249	1251
1249	1298
1251	1262
1251	1250
1258	1256
1261	1260
1276	1274
1281	1280
1285	1376
1294	1308
1294	1292
1309	1307
1313	1313
1315	1338
1316	1314
1319	1317
1319	1318
1333	1335
1348	1346
1360	1362
1373	1372
1373	1372
1383	1381
1388	1387
1389	1395
1393	1393
1394	1392
1395	1398
1400	1406
1402	1401
1403	1419
1405	1408
1414	1428
1419	1417
1429	1428
1445	1443
1451	1451
1459	1458
1468	1466
1471	1479
1473	1484
1478	1503
1479	1487
1480	1484
1481	1479
1483	1494
1485	1483
1485	1484
1490	1489
1499	1506
1504	1511
1506	1504
1508	1511
1513	31
1513	1513
1517	1515
1530	1530
1532	1530
1543	1541
1550	1554
1551	1549
1556	1554
1560	1562
1571	1588
1576	1578
1586	1585
1597	1623
1601	1600
1611	1610
1614	1614
1624	1623
1627	1625
1628	1627
1640	1658
1642	1652
1654	1653
1657	1686
1709	1711
1738	1746
1751	1749
1760	1776
1766	1796
1767	1768
1797	1795
1859	1857
1908	1908
1915	1914
1916	1924
1971	1973
1976	1974
1991	1989
2037	2035
2045	2056
2065	2063
2077	2076
2097	2098
2193	2194
2315	2313
2465	2463
2680	2681
