# Supplementary material for: The Drosophila Individual Activity Monitoring and Detection System (DIAMonDS)
Source: eLife. 2020 Nov 10;9:e58630. doi: 10.7554/eLife.58630 (PMC7655107; doi:10.7554/eLife.58630)
Supplement: Figure 2—figure supplement 4—source data 1. [file elife-58630-fig2-figsupp4-data1.xlsx]

## Sheet: Fig.2-Sup.4A,4B,4C
		Pupariation
		Male
	Plate 1	127	127	129.25	125.5	127	126.5	135.75	133.75	134	131.25	128.25	134.5	134.25	131.5	130	134.25	142.5	134.5	137.75	141.25	127	125.5	130	127.25	128.25	126	134.5	132	130	134.25	125.75	130.5	139.5	124.5	131.75	139	130.5
	Plate 2	128.75	131.75	131.5	127	129.5	134.5	129.75	130.75	130.5	136	135.25	134.75	133.5	136.75	131.75	131.75	145.25	132	127.5	131.75	129.25	128.25	126	129.5	131.25	136.5	137	132.25	133	134.5	130.75	131.5	127	134.5	133.5	133.5	130
	Plate 3	127.75	135	128.5	139.75	137.5	127	126.25	129.25	141	137.75	139.25	125.25	130.25	130	129.25	131.75	135	129	129.75	130.25	131.25	130	128.5	130.75	134.25	130	132.25	133.25	130.5	135.25	135.5	132	130.5	135.5	135	129.25	136.75	131	132.75	132.5	132.25	131.5	131.5	129.5	127.75	136.25	130.5	135.75
	Eclosion
		Male
	Plate 1	231.5	234.75	233.75	229.25	225.75	230.75	239	238	236.5	235	231.25	238.75	238.5	235	233.5	235.75	240	240	243.75	246.25	235.25	230.5	234.25	231.75	234.5	233.5	240	237.75	233.75	237	234.75	234.25	246.75	226.75	234.5	240.75	234.75
	Plate 2	236.5	236.5	236.25	235.5	235.25	241.75	236	244.25	234	243	242.75	241	238	240.25	236.75	238	250	237	234.75	236.5	234.25	232.75	231.5	232.75	237.5	241.5	243.5	237.25	237.5	243.25	235.75	236.25	230.75	238	239	237.25	235.25
	Plate 3	233.5	239	234.25	248.25	244.25	233.5	234	235	243.25	246.75	245.25	230	235	239.25	232.75	236.25	239.5	236.5	235.5	235.25	235.5	235	233.25	236.75	241	235	239	240	237.5	243.25	243.25	239.75	236.75	246.75	241.75	235.5	245.5	235.5	239.75	237.25	238.5	236.5	237.25	234.75	235.25	240.25	236	242.25
	Pupal duration
		Male
	Plate 1	104.5	107.75	104.5	103.75	98.75	104.25	103.25	104.25	102.5	103.75	103	104.25	104.25	103.5	103.5	101.5	97.5	105.5	106	105	108.25	105	104.25	104.5	106.25	107.5	105.5	105.75	103.75	102.75	109	103.75	107.25	102.25	102.75	101.75	104.25
	Plate 2	107.75	104.75	104.75	108.5	105.75	107.25	106.25	113.5	103.5	107	107.5	106.25	104.5	103.5	105	106.25	104.75	105	107.25	104.75	105	104.5	105.5	103.25	106.25	105	106.5	105	104.5	108.75	105	104.75	103.75	103.5	105.5	103.75	105.25
	Plate 3	105.75	104	105.75	108.5	106.75	106.5	107.75	105.75	102.25	109	106	104.75	104.75	109.25	103.5	104.5	104.5	107.5	105.75	105	104.25	105	104.75	106	106.75	105	106.75	106.75	107	108	107.75	107.75	106.25	111.25	106.75	106.25	108.75	104.5	107	104.75	106.25	105	105.75	105.25	107.5	104	105.5	106.5
