# Supplementary material for: The Drosophila Individual Activity Monitoring and Detection System (DIAMonDS)
Source: eLife. 2020 Nov 10;9:e58630. doi: 10.7554/eLife.58630 (PMC7655107; doi:10.7554/eLife.58630)
Supplement: Figure 2—figure supplement 5—source data 1. [file elife-58630-fig2-figsupp5-data1.xlsx]

## Sheet: Fig.2-Sup.5
Pupariation							Eclosion							Pupal duration
Male			Female				Male			Female				Male			Female
96-well	48-well	24-well	96-well	48-well	24-well		96-well	48-well	24-well	96-well	48-well	24-well		96-well	48-well	24-well	96-well	48-well	24-well
138.453	121.37	124.465	143.873	127.87	126.023		242.579	223.027	226.571	245.334	228.053	223.799		95.7908	100.879	89.6406	87.6972	97.9303	95.875
142.754	123.364	126.023	145.078	128.65	126.456		244.388	226.58	228.217	246.195	228.4	226.917		100.86	101.226	99.4244	90.6264	98.0175	96.1336
143.787	124.403	128.794	146.196	130.296	127.669		248.261	226.667	230.556	247.4	228.92	228.303		101.633	101.397	99.4244	99.6603	98.2772	96.4819
144.218	125.877	129.401	147.315	130.383	130.96		249.122	227.62	231.942	253.511	229.007	230.209		101.893	101.656	99.4247	99.9986	98.4528	97.0861
145.508	126.917	129.747	151.79	132.81	131.219		249.724	230.133	231.942	258.417	231	230.296		102.151	101.917	99.7706	100.084	98.5369	97.3428
146.11	127.956	130.786	152.909	133.069	131.652		249.811	231.173	232.202	261.515	231.347	231.509		102.417	102.177	100.638	100.256	98.5375	97.5186
147.057	128.043	131.393	161.168	133.069	131.999		250.843	231.953	233.76	264.012	231.78	231.509		102.496	102.177	100.984	100.347	98.6242	97.6058
147.229	129.949	132.085	166.073	133.503	132.518		251.188	232.906	233.934	269.95	232.56	232.116		102.668	102.178	100.986	100.602	98.7978	97.9536
148.262	130.21	133.037	167.02	134.023	132.864		254.888	234.9	235.06	269.95	235.767	232.375		103.614	102.265	101.156	100.606	98.7986	98.2114
148.692	131.943	133.298	169.603	136.883	133.298		260.396	236.287	235.147	270.209	237.847	232.895		104.126	102.266	101.416	100.782	98.8856	98.2147
151.704	133.503	134.683	172.873	137.229	134.163		263.581	237.5	235.319	275.286	238.367	233.068		104.221	102.351	101.762	101.036	99.3192	98.3861
152.909	133.936	135.636	174.164	137.836	134.25		266.25	238.02	237.312	275.631	238.454	233.068		104.392	102.438	101.848	101.123	99.4036	98.5581
152.995	134.196	135.722	174.594	138.182	135.376		275.286	238.627	237.312	277.008	238.54	234.02		104.483	102.438	102.022	101.47	99.405	98.6467
154.113	135.063	136.675	175.368	138.269	135.809		278.557	238.974	238.871	278.213	238.627	234.194		105.082	102.611	102.106	101.726	99.4906	98.8192
157.985	135.323	136.675	175.799	138.963	136.675		278.815	238.974	239.044	280.794	238.627	234.627		105.427	102.697	102.194	101.814	99.4914	99.0767
160.136	135.409	137.454	176.314	139.656	136.935		284.237	239.58	239.477	281.396	240.1	235.233		105.593	102.699	102.195	102.845	99.9247	99.0792
161.168	135.496	139.274	176.658	139.829	137.541		284.495	239.754	239.911	282.773	240.88	238.697		105.596	102.87	102.368	102.846	100.011	99.1642
163.061	136.016	139.62	178.55	140.435	138.234		284.581	239.84	240.257	283.548	240.967	238.784		105.599	102.959	102.629	102.93	100.013	99.1656
163.836	136.016	140.053	180.959	140.782	138.841		292.668	240.187	240.604	285.441	241.92	238.784		107.487	103.044	102.802	103.276	100.098	99.2497
170.894	136.103	141.092	181.819	141.042	139.274		293.614	240.274	241.729	286.044	244.347	239.044		134.77	103.045	102.975	103.362	100.271	99.5106
173.216	136.449	141.265	182.766	143.209	139.533			240.533	242.249	289.054	244.78	239.044			103.217	103.236	103.535	100.271	99.5975
176.916	136.71	150.617	184.229	143.555	140.486			240.793	242.595	289.141	245.213	240.344			103.218	103.929	103.622	100.444	99.8567
179.754	137.056	151.05	185.606	143.988	140.746			240.88	256.453	289.829	245.3	240.344			103.303	104.274	103.877	100.445	99.8569
182.164	137.316	157.2	186.467	144.075	141.179			241.487	262.343	293.873	245.387	241.036			103.391	105.143	104.135	100.531	99.8572
187.241	137.749	167.334	190.167	145.288	141.179			241.573	268.319	295.939	245.734	241.47			103.564	105.403	104.826	100.532	99.8603
188.704	137.836		192.146	145.375	141.438			242.093		298.52	245.82	242.076			103.566		109.385	100.533	99.9447
189.393	138.182		194.47	145.895	142.131			242.18		310.14	247.38	242.682			103.652		114.543	100.791	100.204
195.072	138.269		195.244	146.329	144.209			242.613			247.38	243.635			103.91			100.791	100.291
	138.442		210.48	147.022	144.296			242.787			247.727	243.635			103.911			100.791	100.377
	138.702		210.824	147.455	144.556			243.047			248.42	244.587			103.998			100.964	100.377
	138.789			147.889	144.988			243.047			248.506	244.674			104.258			100.964	100.635
	139.049			147.975	146.72			243.48			250.76	245.539			104.344			101.053	100.724
	139.396			150.227	147.24			243.653			252.667	245.626			104.344			101.137	100.811
	139.656			151.181	149.664			244.26			254.14	249.177			104.433			101.398	100.894
	140.002			151.701	149.751			244.347			254.746	251.169			104.517			101.486	101.243
	140.262			154.214	151.137			244.607			256.046	251.862			104.605			101.746	101.419
	141.822			155.687	153.042			244.953			257.433	251.948			104.691			102.005	101.503
	141.909			156.641	158.932			245.387			257.693	257.147			104.778			102.093	102.11
	142.169			157.421	160.145			246.773			258.82	258.792			104.778			102.957	102.196
	144.508			158.287	162.31			246.946			260.9	260.005			105.038			102.959	104.968
	145.029			159.501	203.273			247.64			261.073				105.296			103.046
	145.548			160.367				248.853			263.066				105.298			103.305
	145.895			162.447				249.547			264.192				105.299			104.344
	146.675			164.18				249.633			264.279				105.731			105.991
	148.755			165.653				250.76			267.746				105.904			106.859
	150.661			167.387				250.846			270.346				105.991			115.611
	151.528							251.02							106.164
	152.914							255.7							106.771
	153.001							255.96							107.031
	154.214							256.826							107.811
	154.387							257.78							107.984
	155.601							258.04							110.237
	157.161							259.686							124.537
	159.674							260.033							133.724
	161.147							262.633
	165.74							263.413
	170.247							286.638
	176.746
