# Supplementary material for: The Drosophila Individual Activity Monitoring and Detection System (DIAMonDS)
Source: eLife. 2020 Nov 10;9:e58630. doi: 10.7554/eLife.58630 (PMC7655107; doi:10.7554/eLife.58630)
Supplement: Figure 2—source data 1. [file elife-58630-fig2-data1.xlsx]

## Sheet: Fig. 2C, Fig.2-Sup.2A
Manual	Sapphire
402	315
399	340
402	341
406	358
420	358
413	361
428	367
395	369
394	370
407	370
388	376
398	379
403	379
410	379
384	382
425	382
388	384
400	384
394	386
398	386
435	386
392	387
396	387
398	387
392	388
392	388
393	388
407	388
413	388
415	388
398	389
391	390
392	390
394	390
401	390
411	390
398	391
398	391
404	391
396	392
397	392
403	392
406	392
395	393
396	393
408	393
396	394
396	394
398	394
432	394
435	394
400	395
404	395
398	396
398	396
399	396
401	396
417	396
403	398
404	398
407	398
417	398
401	399
403	399
408	399
412	399
403	400
403	400
418	400
404	401
412	401
412	401
416	401
419	401
406	402
410	402
414	402
407	403
407	403
411	403
412	403
405	404
406	404
407	404
410	404
410	404
412	404
413	404
417	404
407	405
407	405
407	405
408	405
409	405
413	405
413	405
408	406
410	406
410	406
411	406
411	406
413	406
415	406
424	406
408	407
409	407
409	407
418	407
424	407
409	408
410	408
411	408
412	408
412	408
410	409
410	409
412	409
412	410
431	410
412	411
412	411
413	411
415	411
416	411
418	411
418	411
419	411
427	411
414	412
416	412
417	412
417	412
419	412
420	412
420	412
421	412
421	412
415	413
415	413
415	413
416	413
427	413
430	413
454	413
410	414
416	414
416	414
416	414
417	414
417	414
419	414
435	414
417	415
417	415
420	415
422	415
428	415
428	415
428	415
419	416
420	416
421	416
422	416
423	416
432	416
421	417
421	418
420	419
421	419
422	419
427	419
422	420
432	420
436	420
424	421
424	421
425	421
424	422
424	422
427	422
429	422
434	422
424	423
425	423
426	423
426	423
428	423
428	423
448	423
427	424
430	424
430	424
427	425
430	425
428	426
429	426
431	426
428	427
430	428
431	428
432	428
435	428
436	428
430	429
433	429
433	430
433	430
460	430
433	431
433	431
434	431
435	431
435	431
436	431
434	432
435	432
455	432
435	433
435	434
437	434
436	435
437	435
438	435
441	435
440	436
440	437
493	437
440	438
441	438
441	439
445	441
445	441
450	442
405	443
446	444
447	445
447	445
459	445
483	445
455	449
453	450
460	452
459	453
458	456
460	456
471	470
480	473
484	482
554	552
449	599
