# Supplementary material for: The Drosophila Individual Activity Monitoring and Detection System (DIAMonDS)
Source: eLife. 2020 Nov 10;9:e58630. doi: 10.7554/eLife.58630 (PMC7655107; doi:10.7554/eLife.58630)
Supplement: Figure 2—source data 2. [file elife-58630-fig2-data2.xlsx]

## Sheet: Fig.2D, Fig.2-Sup.2B
Manual	Sapphire
803	717
813	733
829	741
817	751
854	785
773	790
792	793
794	798
796	798
799	798
793	799
795	799
801	799
799	802
802	802
790	803
797	803
797	803
804	803
793	804
794	804
795	806
796	806
805	806
801	807
806	807
808	807
807	809
809	809
803	810
810	810
801	811
806	811
812	811
812	811
807	813
812	813
813	813
813	813
815	813
808	814
813	816
814	816
818	816
818	816
807	817
815	818
816	818
816	818
820	818
817	819
819	819
820	819
821	819
822	820
813	821
819	821
820	821
822	821
802	822
810	822
816	822
823	822
824	822
802	823
818	823
823	823
816	824
825	824
865	824
811	825
816	825
825	825
827	825
827	825
819	826
825	826
825	826
826	826
807	827
813	827
819	827
824	827
826	828
827	828
827	828
828	828
829	828
821	829
823	829
824	829
824	829
827	829
831	829
828	830
831	830
832	830
832	830
821	831
821	831
822	831
826	831
828	831
829	831
830	831
830	831
832	831
836	831
814	832
824	832
830	832
830	832
830	832
831	832
832	832
831	833
833	833
825	834
830	834
833	834
833	834
836	834
824	835
832	835
829	836
832	836
836	836
827	837
829	837
832	837
833	837
837	837
830	838
830	838
831	838
832	838
833	838
835	838
837	838
837	838
839	838
829	839
835	839
835	839
838	839
825	840
831	840
833	840
838	840
839	840
840	840
838	841
834	842
836	842
837	842
834	843
835	843
841	843
842	843
845	843
836	844
840	844
844	844
835	845
842	845
832	846
838	846
839	846
841	846
848	846
839	847
840	847
846	847
846	847
849	847
849	847
859	847
838	848
840	848
842	848
845	848
846	848
850	848
829	849
835	849
844	849
842	850
846	850
850	851
842	852
847	852
839	853
843	853
849	854
851	854
850	855
852	855
857	857
858	857
852	859
861	859
854	860
856	861
863	861
850	862
851	862
862	862
861	863
853	864
861	864
867	865
859	866
854	867
863	867
867	867
857	869
863	871
867	871
865	873
872	873
864	874
871	874
877	875
875	876
877	876
877	878
873	879
818	883
844	887
890	889
825	896
846	896
894	898
900	905
863	910
912	912
883	934
836	935
865	1054
833	1591
