# Supplementary material for: The Drosophila Individual Activity Monitoring and Detection System (DIAMonDS)
Source: eLife. 2020 Nov 10;9:e58630. doi: 10.7554/eLife.58630 (PMC7655107; doi:10.7554/eLife.58630)
Supplement: Figure 2—source data 3. [file elife-58630-fig2-data3.xlsx]

## Sheet: Fig.2E,2F,2G
Male	Pupariation	Eclosion		Female	Pupariation	Eclosion		Pupariation	Female	Male		Eclosion	Female	Male
M	127	231.5		F	133.5	233.75			133.5	127			233.75	231.5
M	127	234.75		F	141.25	240.5			141.25	127			240.5	234.75
M	129.25	233.75		F	126.5	226			126.5	129.25			226	233.75
M	125.5	229.25		F	130.75	231.5			130.75	125.5			231.5	229.25
M	127	225.75		F	129.75	229.25			129.75	127			229.25	225.75
M	126.5	230.75		F	139.25	238.75			139.25	126.5			238.75	230.75
M	135.75	239		F	126.5	225			126.5	135.75			225	239
M	133.75	238		F	137.5	235.5			137.5	133.75			235.5	238
M	134	236.5		F	127	226.75			127	134			226.75	236.5
M	131.25	235		F	150.75	252.5			150.75	131.25			252.5	235
M	128.25	231.25		F	127.5	226.5			127.5	128.25			226.5	231.25
M	134.5	238.75		F	135.75	233.5			135.75	134.5			233.5	238.75
M	134.25	238.5		F	135.75	235.5			135.75	134.25			235.5	238.5
M	131.5	235		F	136.25	234			136.25	131.5			234	235
M	130	233.5		F	133.5	233.5			133.5	130			233.5	233.5
M	134.25	235.75		F	132.25	231			132.25	134.25			231	235.75
M	142.5	240		F	128.25	230.75			128.25	142.5			230.75	240
M	134.5	240		F	131.25	228.5			131.25	134.5			228.5	240
M	137.75	243.75		F	129.25	229			129.25	137.75			229	243.75
M	141.25	246.25		F	136.5	235.75			136.5	141.25			235.75	246.25
M	127	235.25		F	130	227.75			130	127			227.75	235.25
M	125.5	230.5		F	130.5	230.5			130.5	125.5			230.5	230.5
M	130	234.25		F	131.5	232			131.5	130			232	234.25
M	127.25	231.75		F	132.5	232.25			132.5	127.25			232.25	231.75
M	128.25	234.5		F	128.75	236.25			128.75	128.25			236.25	234.5
M	126	233.5		F	134	232			134	126			232	233.5
M	134.5	240		F	135.25	239.75			135.25	134.5			239.75	240
M	132	237.75		F	127.25	228			127.25	132			228	237.75
M	130	233.75		F	129.5	229.25			129.5	130			229.25	233.75
M	134.25	237		F	129	230.5			129	134.25			230.5	237
M	125.75	234.75		F	128.5	227.75			128.5	125.75			227.75	234.75
M	130.5	234.25		F	132.75	234.75			132.75	130.5			234.75	234.25
M	139.5	246.75		F	148.25	255.5			148.25	139.5			255.5	246.75
M	124.5	226.75		F	130.5	231.75			130.5	124.5			231.75	226.75
M	131.75	234.5		F	130.75	230.75			130.75	131.75			230.75	234.5
M	139	240.75		F	129.5	228.25			129.5	139			228.25	240.75
M	130.5	234.75		F	131.75	233.75			131.75	130.5			233.75	234.75
M	128.75	236.5		F	126.25	226.25			126.25	128.75			226.25	236.5
M	131.75	236.5		F	127	226.25			127	131.75			226.25	236.5
M	131.5	236.25		F	131.75	237			131.75	131.5			237	236.25
M	127	235.5		F	123.5	220.75			123.5	127			220.75	235.5
M	129.5	235.25		F	126	225.75			126	129.5			225.75	235.25
M	134.5	241.75		F	130.5	233.75			130.5	134.5			233.75	241.75
M	129.75	236		F	130.25	228			130.25	129.75			228	236
M	130.75	244.25		F	135.75	235.25			135.75	130.75			235.25	244.25
M	130.5	234		F	137.5	242.25			137.5	130.5			242.25	234
M	136	243		F	133.5	232.75			133.5	136			232.75	243
M	135.25	242.75		F	130	231			130	135.25			231	242.75
M	134.75	241		F	132.75	238			132.75	134.75			238	241
M	133.5	238		F	135	237.5			135	133.5			237.5	238
M	136.75	240.25		F	130.25	230.75			130.25	136.75			230.75	240.25
M	131.75	236.75		F	138.75	241			138.75	131.75			241	236.75
M	131.75	238		F	136.5	237.25			136.5	131.75			237.25	238
M	145.25	250		F	128.25	227.25			128.25	145.25			227.25	250
M	132	237		F	128	230			128	132			230	237
M	127.5	234.75		F	134.5	235			134.5	127.5			235	234.75
M	131.75	236.5		F	136.25	238.5			136.25	131.75			238.5	236.5
M	129.25	234.25		F	126.5	225.5			126.5	129.25			225.5	234.25
M	128.25	232.75		F	133.5	234.25			133.5	128.25			234.25	232.75
M	126	231.5		F	134.5	235.75			134.5	126			235.75	231.5
M	129.5	232.75		F	126.5	228.25			126.5	129.5			228.25	232.75
M	131.25	237.5		F	131.25	232.25			131.25	131.25			232.25	237.5
M	136.5	241.5		F	129	229.5			129	136.5			229.5	241.5
M	137	243.5		F	130.75	233			130.75	137			233	243.5
M	132.25	237.25		F	129.25	232.25			129.25	132.25			232.25	237.25
M	133	237.5		F	131.75	231.5			131.75	133			231.5	237.5
M	134.5	243.25		F	137.75	242.75			137.75	134.5			242.75	243.25
M	130.75	235.75		F	130.5	231.5			130.5	130.75			231.5	235.75
M	131.5	236.25		F	129.25	229.5			129.25	131.5			229.5	236.25
M	127	230.75		F	130	231.25			130	127			231.25	230.75
M	134.5	238		F	132.5	235.25			132.5	134.5			235.25	238
M	133.5	239		F	133	236.75			133	133.5			236.75	239
M	133.5	237.25		F	134.25	235.75			134.25	133.5			235.75	237.25
M	130	235.25		F	142	242			142	130			242	235.25
M	127.75	233.5		F	132.5	235.75			132.5	127.75			235.75	233.5
M	135	239		F	125.5	229			125.5	135			229	239
M	128.5	234.25		F	134.75	234.75			134.75	128.5			234.75	234.25
M	139.75	248.25		F	142.25	244.25			142.25	139.75			244.25	248.25
M	137.5	244.25		F	132.25	232.5			132.25	137.5			232.5	244.25
M	127	233.5		F	136.25	235.5			136.25	127			235.5	233.5
M	126.25	234		F	127.75	228			127.75	126.25			228	234
M	129.25	235		F	127.75	226.5			127.75	129.25			226.5	235
M	141	243.25		F	147.5	251			147.5	141			251	243.25
M	137.75	246.75		F	136.25	237.75			136.25	137.75			237.75	246.75
M	139.25	245.25		F	132	233			132	139.25			233	245.25
M	125.25	230		F	133	233.25			133	125.25			233.25	230
M	130.25	235		F	128	229.25			128	130.25			229.25	235
M	130	239.25		F	132.5	243.75			132.5	130			243.75	239.25
M	129.25	232.75		F	135	235.5			135	129.25			235.5	232.75
M	131.75	236.25		F	129.75	230.25			129.75	131.75			230.25	236.25
M	135	239.5		F	130.5	229.75			130.5	135			229.75	239.5
M	129	236.5		F	125.5	226			125.5	129			226	236.5
M	129.75	235.5		F	129	232			129	129.75			232	235.5
M	130.25	235.25		F	136	238.25			136	130.25			238.25	235.25
M	131.25	235.5		F	130.25	234.25			130.25	131.25			234.25	235.5
M	130	235		F	135.5	239			135.5	130			239	235
M	128.5	233.25		F	132.75	233.25			132.75	128.5			233.25	233.25
M	130.75	236.75		F	126.75	227.25			126.75	130.75			227.25	236.75
M	134.25	241		F	136.5	235			136.5	134.25			235	241
M	130	235		F	136.25	237			136.25	130			237	235
M	132.25	239		F	130	232.5			130	132.25			232.5	239
M	133.25	240		F	131.75	233.75			131.75	133.25			233.75	240
M	130.5	237.5		F	129.25	228.75			129.25	130.5			228.75	237.5
M	135.25	243.25		F	133	233.75			133	135.25			233.75	243.25
M	135.5	243.25		F	136.25	237			136.25	135.5			237	243.25
M	132	239.75		F	128.5	227.75			128.5	132			227.75	239.75
M	130.5	236.75		F	132.75	232			132.75	130.5			232	236.75
M	135.5	246.75		F	131	232.25			131	135.5			232.25	246.75
M	135	241.75		F	131.5	232.5			131.5	135			232.5	241.75
M	129.25	235.5		F	140.75	245.75			140.75	129.25			245.75	235.5
M	136.75	245.5		F	142.25	242.75			142.25	136.75			242.75	245.5
M	131	235.5		F	133.75	234.5			133.75	131			234.5	235.5
M	132.75	239.75		F	140	240.5			140	132.75			240.5	239.75
M	132.5	237.25		F	132.75	236.25			132.75	132.5			236.25	237.25
M	132.25	238.5		F	134.25	236.25			134.25	132.25			236.25	238.5
M	131.5	236.5		F	142.5	243.75			142.5	131.5			243.75	236.5
M	131.5	237.25		F	130.75	230.75			130.75	131.5			230.75	237.25
M	129.5	234.75		F	133.75	235.75			133.75	129.5			235.75	234.75
M	127.75	235.25								127.75				235.25
M	136.25	240.25								136.25				240.25
M	130.5	236								130.5				236
M	135.75	242.25								135.75				242.25
