# Supplementary material for: The Drosophila Individual Activity Monitoring and Detection System (DIAMonDS)
Source: eLife. 2020 Nov 10;9:e58630. doi: 10.7554/eLife.58630 (PMC7655107; doi:10.7554/eLife.58630)
Supplement: Figure 3—figure supplement 1—source data 1. [file elife-58630-fig3-figsupp1-data1.xlsx]

## Sheet: Fig.3-Sup.1
	Manual	Sapphire
	268	237
	238	220
	323	316
	262	247
	286	275
	259	248
	293	272
	227	202
	248	220
	251	241
	250	238
	297	278
	287	234
	270	250
	271	250
	332	309
	397	356
	340	333
	281	265
	321	317
	307	287
	305	254
	231	218
	445	433
	274	259
	273	254
	283	273
	266	258
	254	242
	235	220
	270	261
	252	230
	286	251
	273	258
	236	229
	233	213
	243	228
	301	283
	442	411
	376	365
	399	366
	460	439
	312	294
	431	419
	482	462
	316	342
	404	391
	537	491
	422	363
	611	463
	397	376
	353	337
	397	386
	525	505
	389	362
	396	384
	363	348
	461	441
	389	346
	470	459
	416	390
	345	341
	454	428
	383	368
	419	397
	499	457
	391	367
	463	423
	410	395
	411	394
	370	352
	565	515
	359	346
	475	451
	418	363
	427	401
	454	450
	325	263
	293	270
	388	298
	364	318
	380	355
	373	351
	326	304
	358	328
	356	335
	364	358
	299	289
	377	359
	342	316
	627	574
	322	314
	430	404
	407	382
	406	330
	394	384
	338	328
	376	367
	394	358
	384	316
	408	389
	693	673
	510	497
	467	440
	412	400
	553	532
	383	361
	456	437
	584	564
	518	499
	377	374
	480	465
	356	345
	512	494
	427	408
	368	360
	374	359
	364	296
	396	377
	363	315
	381	343
	402	392
	263	256
	278	268
	360	307
	249	232
	292	280
	244	217
	264	242
	272	254
	226	217
	271	261
	227	219
	348	315
	289	240
	244	232
	245	230
	238	220
	284	272
	296	272
	257	236
	292	247
	411	355
	298	267
	300	289
	253	237
	249	243
	327	314
	259	221
	255	250
	291	272
	239	201
	288	277
	306	286
	239	234
	368	328
	290	282
	389	375
	435	421
	501	475
	392	373
	377	335
	317	286
	481	465
	484	461
	457	436
	517	467
	478	460
	386	376
	398	383
	487	452
	207	200
	328	298
	489	484
	291	264
	259	253
	326	316
	330	300
	298	294
	288	263
	267	251
	253	242
	266	244
	283	268
	294	279
	408	364
	287	274
	284	283
	262	243
	463	339
	261	255
	282	271
	244	227
	291	283
	362	319
	273	262
	395	356
	322	300
	290	285
	227	221
	268	245
	474	461
	400	338
	395	376
	407	391
	527	508
	583	559
	402	393
	409	404
	413	401
	465	431
	419	399
	360	300
	382	362
	420	386
	520	484
	249	147
	139	121
	232	207
	195	167
	136	132
	201	189
	122	118
	213	209
	260	241
	153	142
	323	280
	180	145
	274	252
	216	210
	104	94
	204	189
	180	162
	225	220
	224	206
	213	203
	136	121
	139	97
	150	136
	229	195
	196	189
	262	242
	133	96
	203	186
	272	253
	168	149
	344	330
	231	215
	183	171
	205	188
	176	155
	204	188
	271	266
	254	227
	231	220
	198	182
	326	379
	303	289
	176	159
	184	178
	186	159
	192	157
	195	114
	175	160
	227	206
	150	118
	261	251
	159	154
	182	164
	176	154
	219	192
	159	121
	157	149
	154	142
	167	152
	210	188
	166	159
	154	132
	164	81
	143	126
	177	156
	291	270
	254	162
	166	136
	123	97
	303	278
	105	39
	159	138
	377	297
	163	156
	200	174
	200	190
	228	211
	151	129
	199	178
	237	217
	259	194
	177	162
	228	216
	215	208
	260	237
	188	165
	221	215
	159	150
	187	162
	210	191
	154	136
	168	152
	246	225
	174	148
	160	136
	182	160
	153	142
	133	127
	195	187
	152	138
	202	195
	153	76
	198	179
	191	175
	196	160
	112	105
	208	192
	194	180
	165	154
	163	141
	141	101
	264	250
	174	167
	190	169
	196	158
	175	166
	281	245
	237	220
	193	176
	186	168
	187	168
	202	184
	263	260
	183	166
	180	171
	211	196
	278	265
	165	153
	155	146
	233	221
	177	160
	254	195
	257	239
	236	205
	170	164
	170	149
	200	190
	131	123
	185	171
	225	210
	281	240
	148	147
	417	388
	180	154
	231	213
	169	164
	260	245
	189	177
	198	179
	77	65
	195	173
	200	185
	302	275
	234	213
	162	129
	130	116
	213	190
	255	226
	334	299
	210	200
	203	191
	165	129
	225	221
	196	131
	190	184
	344	324
	211	199
	130	111
	306	265
	156	136
	211	208
	170	156
	230	205
	100	97
	279	242
	243	233
	188	168
	210	196
	201	196
	209	198
	200	177
	243	237
	235	218
	119	107
	254	234
	135	122
	153	123
	307	280
	325	300
	158	127
	351	306
	210	109
	233	205
	278	250
	258	240
	233	212
	327	312
	176	153
	209	198
	195	186
	200	184
	231	227
	132	112
	205	185
	200	182
	338	289
	229	207
	205	184
	150	122
	251	228
	200	173
	221	208
	259	234
	203	176
	183	175
	202	170
	192	181
	189	185
	184	155
	205	188
	295	279
	297	271
	355	348
	279	277
	302	278
	341	321
	271	263
	322	312
	307	301
	314	300
	375	390
	362	336
	445	411
	348	317
	318	304
	323	315
	366	354
	301	294
	384	358
	315	301
	321	311
	284	266
	332	327
	286	277
	295	269
	446	434
	345	331
	391	352
	434	424
	379	361
	295	268
	313	308
	312	289
	303	269
	329	318
	366	354
	341	333
	341	333
	432	403
	371	365
	269	253
	313	296
	322	306
	325	308
	333	280
	156	152
	141	120
	360	339
	285	276
	218	203
	297	276
	302	275
	312	292
	316	300
	256	242
	322	256
	297	282
	382	365
	362	321
	314	302
	310	293
	339	315
	305	299
	268	266
	406	379
	600	267
	277	222
	441	405
	297	279
	233	229
	340	304
	267	264
	347	332
	302	287
	351	345
	307	278
	232	218
	237	229
	331	323
	360	296
	279	258
	332	306
	350	325
	303	282
	317	309
	363	344
	339	306
	365	319
	325	309
	377	365
	425	380
	474	449
	376	344
	368	338
	380	376
	344	312
	395	386
	513	494
	394	365
	338	319
	344	328
	528	503
	390	373
	317	301
	238	225
	362	342
	305	289
	369	354
	316	297
	417	412
	304	289
	334	296
	295	235
	305	294
	431	413
	514	495
	463	386
	337	322
	414	395
	464	446
	490	469
	600	584
	552	504
	435	427
	339	325
	389	368
	472	442
	376	368
	376	347
	330	315
	419	407
	405	383
	387	373
	365	346
	568	528
	576	513
	386	372
	370	356
	449	441
	362	342
	473	459
	462	454
	479	467
	339	332
	497	479
	438	411
	283	367
	487	463
	410	390
	271	261
	295	282
	533	472
	383	323
	489	368
	391	372
	406	340
	319	327
	344	323
	397	391
	492	483
	308	292
	344	336
	455	429
	373	354
	351	337
	394	368
	413	292
	421	398
	374	372
	396	372
	275	261
	314	290
	377	358
	415	392
	365	345
	328	324
	346	339
	380	365
	366	361
	408	394
	404	376
	332	327
	402	354
	474	463
	429	414
	355	348
	408	402
	453	425
	402	398
	346	344
	377	349
	485	465
	413	395
	374	367
	377	386
	351	347
	409	380
	361	353
	546	518
	423	399
	510	499
	447	442
	410	363
	450	446
	360	343
	533	504
	366	351
	410	397
	364	359
	373	370
	430	413
	366	349
	412	402
	438	423
	460	439
	405	393
	441	423
	399	375
	532	516
	470	432
	551	509
	419	398
	382	361
	405	390
	333	324
	322	312
	422	415
	296	289
	355	345
	319	315
	308	303
	383	369
	318	313
	261	238
	336	317
	350	331
	386	367
	274	266
	292	284
	321	315
	336	329
	348	338
	329	299
	386	364
	457	412
	270	266
	480	459
	289	282
	388	370
	344	293
	369	366
	375	357
	342	325
	354	349
	891	1022
	367	330
	528	481
	446	410
	362	355
	545	529
	360	359
	404	397
	405	364
	475	457
	404	398
	421	414
	370	365
	400	393
	380	374
	404	368
	478	465
	357	347
	367	346
	429	425
	372	348
	515	494
	444	426
	370	361
	594	576
	346	332
	581	545
	366	355
	493	475
	366	364
	344	324
	413	389
	506	493
	353	342
	394	384
	381	366
	455	449
	435	401
	442	421
	314	310
	297	289
	287	279
	335	329
	328	323
	354	338
	273	262
	359	338
	325	311
	192	182
	367	322
	231	226
	470	453
	251	242
	357	351
	303	297
	395	394
	286	283
	360	353
	282	276
	297	288
	298	292
	382	361
	242	240
	366	355
	348	340
	439	417
	359	320
	271	262
	386	376
	317	297
	378	352
	438	430
	364	356
	275	269
	360	347
	248	295
	330	323
	382	371
	447	438
	418	400
	618	607
	875	840
	413	402
	477	470
	501	482
	473	461
	347	340
	504	498
	501	476
	398	372
	397	384
	513	499
	371	325
	409	403
	421	399
	447	436
	388	551
	406	385
	675	650
	416	412
	479	457
	389	368
	523	500
	529	507
	480	454
	429	374
	434	417
	398	383
	442	419
	351	346
	444	428
	375	338
	382	369
	375	332
	397	388
	506	483
	392	374
	667	651
	880	861
	368	349
	378	370
	386	371
	443	424
	319	315
	378	351
	387	369
	311	295
	331	326
	406	396
	308	338
	374	370
	301	293
	323	308
	294	274
	347	336
	333	327
	348	333
	683	619
	366	358
	403	387
	270	260
	369	367
	250	241
	384	374
	365	351
	347	342
	330	311
	373	346
	354	338
	335	318
	357	341
	310	286
	321	309
	372	330
	219	214
	390	370
	495	485
	313	308
	313	291
	263	243
