# Supplementary material for: The Drosophila Individual Activity Monitoring and Detection System (DIAMonDS)
Source: eLife. 2020 Nov 10;9:e58630. doi: 10.7554/eLife.58630 (PMC7655107; doi:10.7554/eLife.58630)
Supplement: Figure 3—source data 1. [file elife-58630-fig3-data1.xlsx]

## Sheet: Fig.3A
R29H01-GAL4> TeTxLC
Wandering 3rd	7.19139	9.18444	10.8306	12.5642	12.8239	12.9967	13.0833	13.2572	13.3425	14.2108	15.1614	15.4214	16.1172	16.3775	16.6339	17.1569	19.1461	19.5794	19.6703	19.7569	19.8394	19.8436	19.9303	20.0992	20.1903	20.3589	20.5322	20.6192	20.8836	21.0567	21.3117	22.3569	22.4436	22.6978	23.1375	23.2175	23.2175	23.5711	23.8308	23.9175	23.9972	24.0042	24.0042	24.0042	24.2569	24.2644	24.5169	24.5169	24.6978
Early 3rd	32.6608	34.1453	36.2253	38.5669	38.8114	40.3008	40.9078	41.5147	41.8444	42.5375	43.3169	45.4831	46.8022	47.7556	48.6225	49.2086	49.4036	53.3669	53.4786	55.0131	59.345	61.5969	63.2736	63.5892	69.3419
2nd	63.8492	67.5756	57.8719	66.1028	64.9758	69.6547	70.7814	77.8864	77.1931	51.4847	57.4653	70.0358	66.0467	54.6919
R29H01-GAL4>w (control)
Wandering 3rd	2.68556	0	0.0869444	0.26	0.26	0.260278	0.346667	0.346667	0.346944	0.433333	0.433333	0.693333	0.866667	1.03972	1.12611	1.21306	1.21306	1.38611	1.47278	1.64611	1.64639	1.90611	2.07944	2.51278	2.59917	2.77222	2.77278	2.85944	3.03222	3.20556	3.37917	3.89861	4.50611	4.67917	5.1125	5.19833	5.54472	5.80472	5.80472	5.80583	5.80583	5.89139	7.10583	8.31778	10.7444	11.4369	13.6022	18.1067	27.2981
Early 3rd	16.2039	5.11167	9.61806	12.1306	12.2175	12.3033	12.5642	12.5642	12.65	12.6508	13.5178	13.5178	13.6022	14.1242	14.6442	14.9881	15.0747	15.2508	15.3378	16.2908	16.6375	16.7242	16.8106	16.8106	16.8106	16.9836	17.0675	17.2403	17.5036	18.28	18.4533	18.7131	19.2328	19.4061	19.7569	20.0169	20.0169	20.1903	21.2253	21.2253	22.0106	22.3511	22.3511	22.6111	22.9575	23.3042	23.5642	23.8242	23.9972
2nd	50.6814	42.9878	44.01	45.0497	45.3964	45.8294	46.5422	46.5422	46.6094	47.2158	47.8222	47.9292	48.6019	48.6886	48.8619	48.8619	49.3819	49.75	50.4211	50.6178	50.7681	50.7681	51.2244	51.5478	51.6344	51.7211	51.7453	51.9811	52.0675	52.3519	53.2803	53.4786	53.7136	53.7386	53.7386	53.9119	53.9733	54.0853	54.3453	54.4064	54.4319	54.7786	54.865	55.0997	55.1864	55.2114	55.2981	55.2981	55.3844
[truncated: 33 more columns]
