# Supplementary material for: The Drosophila Individual Activity Monitoring and Detection System (DIAMonDS)
Source: eLife. 2020 Nov 10;9:e58630. doi: 10.7554/eLife.58630 (PMC7655107; doi:10.7554/eLife.58630)
Supplement: Figure 3—source data 2. [file elife-58630-fig3-data2.xlsx]

## Sheet: Fig.3C
sex (M or F)	Pupariation timing	eclosion timing
		1M	0.89M	0.79M	0.68M	0.58M	0.47M	0.36M	0.27M	0.15M
M	251	360.25
M	251.25	360.5
M	245.75	353.5
M	258.5	368.25
M	245.5	368.5
M	249	358
M	248.25	359.5
M	249.75	369.5
M	255.25	367.25
M	249.5	359
M	247.25	357.25
M	245.75	354.75
M	245.5	354.75
M	251	362.5
M	234.5		342.5
M	232.25		337.75
M	240.25		350.5
M	242		350.75
M	273.75		385.75
M	243.75		354.25
M	257.75		367.75
M	236.5		343.25
M	235.25		343.25
M	242.25		352.25
M	249		359.5
M	243.25		353.25
M	250.75		363.5
M	250		360.75
M	238		347.5
M	244.75		353.5
M	241.25		350.25
M	248			357.25
M	236.5			346.75
M	227.25			335.75
M	233.25			342.5
M	229.5			334
M	235.5			345.25
M	241.75			346.5
M	245.5			358.25
M	240.25			348.75
M	241			342.5
M	229.75			338.25
M	238.75			347
M	242.75			353.25
M	237.75				350.5
M	247.75				367.75
M	229				337.5
M	228.75				336.75
M	229.25				339.5
M	243.5				358.25
M	238.5				348
M	237				346.75
M	234				345.25
M	237.25				348
M	235.25				345.75
M	234				343.5
M	233.75				347
M	247					358.5
M	230.75					342
M	232.75					345.5
M	238.75					349
M	232.75					344
M	236.75					346.25
M	228					343.75
M	233.5					345.75
M	234.75					345.25
M	225.5					336.5
M	232.75					341.25
M	233.5					343.75
M	235.25					345.25
M	237					349.25
M	235.5					347
M	225.75						336
M	216.75						326.75
M	241.5						354
M	233.5						344.75
M	229.75						339.5
M	235						345
M	228.75						339.5
M	234.5						345
M	225						336.75
M	240.25						343.25
M	229						339.75
M	224.5						336
M	231						341.25
M	226.5						342
M	231							344.75
M	224.75							338.5
M	223.25							339
M	229.5							341.25
M	224.75							337.5
M	224.75							336
M	221.75							335.25
M	221.5							337.25
M	224							336.25
M	222								333.5
M	216.75								326.75
M	286.25								404
M	224.5								339.75
M	222								333.25
M	219								330.75
M	221								332.25
M	227.25								339.5
M	224								335
M	229.25								341.5
M	213								321.75
M	227.75								339.75
M	223.5								333.75
M	232								344
M	227.75								340.25
M	220.25									332
M	226.25									340
M	217.75									327.25
M	219									331.25
M	221.5									334
M	218									327.5
M	233.5									345.5
M	225.25									338.75
M	221.25									334.5
M	226.75									341
M	225.75									339.25
M	219.75									332.75
M	223.5									337.25
F	261	366.25
F	258.75	362.75
F	261.5	370.5
F	276.25	383.5
F	255.75	360
F	268.25	372.75
F	271.75	377.75
F	261.5	366.5
F	264.25	370.25
F	257	363.25
F	249.25	354.75
F	249.5		351.75
F	265.75		371.25
F	257.25		362.75
F	255		363.5
F	245.75		350.5
F	253.25		360
F	255		363.5
F	245.75		347.25
F	244.5		348.5
F	249.25			351.75
F	253.5			358.5
F	237.75			344.5
F	250.5			354.5
F	243.25			345.25
F	243.25			344.5
F	240.5			347.25
F	254.25			357.5
F	233.75			334
F	247			351.75
F	236.25			341.5
F	240.5			343.75
F	247.25			356.5
F	242				350.5
F	243.75				349.75
F	244.25				354.25
F	246				354.75
F	244.5				351.25
F	235.75				343.5
F	242				361
F	245.25				352.5
F	241				347
F	241.5				351.75
F	236.25				347.25
F	263				373.5
F	237				342.75
F	241.25				351.5
F	236.25					343.5
F	235.5					340.5
F	239.75					346.5
F	242.5					348.75
F	232.75					337
F	230.75					334.5
F	237.75					346.25
F	236.5					344.25
F	233.25					338.75
F	230.75						334.25
F	242.25						349
F	248.75						357.5
F	226.5						329.75
F	228						331.75
F	233.25						339.75
F	235.5						343
F	239.75						345.75
F	235.75						341.75
F	248.5							361.5
F	231							340
F	230							338.25
F	234							340.75
F	217.25							319.75
F	229							335.5
F	228.75							335.25
F	229.25							336.75
F	219							325.5
F	231.5							340.5
F	226.25							334.25
F	222.25							330.5
F	240.25							349.75
F	233.25							340.5
F	234.5							345.75
F	225.75							335
F	230.25							338.5
F	228								334.5
F	227								335.75
F	229								335
F	228.5								337
F	220.75								327.5
F	225								333.25
F	224.25								329.5
F	226.5								338.75
F	225								334.25
F	230.25								337.75
F	226.5								332
F	220.5								325.75
F	223.5									330.25
F	226.75									334.5
F	228.75									337.25
F	234									340.75
F	221.5									327.25
F	243									352
F	225.5									331.25
F	239									345
F	223.5									329.25
F	224.75									330.25
F	229.25									338.75
F	227.5									335.25
F	225.75									335
F	227.25									336.75
F	227.5									335.25
F	231.25									337.5

## Sheet: Fig.3D,3E,3F
	Pupariation	Female																				Male
	1M	261	258.75	261.5	276.25	255.75	268.25	271.75	261.5	264.25	257	249.25										251	251.25	245.75	258.5	245.5	249	248.25	249.75	255.25	249.5	247.25	245.75	245.5	251
	0.89M	249.5	265.75	257.25	255	245.75	253.25	255	245.75	244.5												234.5	232.25	240.25	242	273.75	243.75	257.75	236.5	235.25	242.25	249	243.25	250.75	250	238	244.75	241.25
	0.79M	249.25	253.5	237.75	250.5	243.25	243.25	240.5	254.25	233.75	247	236.25	240.5	247.25								248	236.5	227.25	233.25	229.5	235.5	241.75	245.5	240.25	241	229.75	238.75	242.75
	0.68M	242	243.75	244.25	246	244.5	235.75	242	245.25	241	241.5	236.25	263	237	241.25							237.75	247.75	229	228.75	229.25	243.5	238.5	237	234	237.25	235.25	234	233.75
	0.58M	236.25	235.5	239.75	242.5	232.75	230.75	237.75	236.5	233.25	242											247	230.75	232.75	238.75	232.75	236.75	228	233.5	234.75	225.5	232.75	233.5	235.25	237	235.5
	0.47M	230.75	242.25	248.75	226.5	228	233.25	235.5	239.75	235.75												225.75	216.75	241.5	233.5	229.75	235	228.75	234.5	225	240.25	229	224.5	231	226.5
	0.36M	248.5	231	230	234	217.25	229	228.75	229.25	219	231.5	226.25	222.25	240.25	233.25	234.5	225.75	230.25				231	224.75	223.25	229.5	224.75	224.75	221.75	221.5	224
	0.27M	228	227	229	228.5	220.75	225	224.25	226.5	225	230.25	226.5	220.5	230.5								222	216.75	286.25	224.5	222	219	221	227.25	224	229.25	213	227.75	223.5	232	227.75
	0.15M	223.5	226.75	228.75	234	221.5	243	225.5	239	223.5	224.75	229.25	227.5	225.75	227.25	227.5	231.25					220.25	226.25	217.75	219	221.5	218	233.5	225.25	221.25	226.75	225.75	219.75	223.5
	Eclosion	Female																				Male
	1M	366.25	362.75	370.5	383.5	360	372.75	377.75	366.5	370.25	363.25	354.75										360.25	360.5	353.5	368.25	368.5	358	359.5	369.5	367.25	359	357.25	354.75	354.75	362.5
	0.89M	351.75	371.25	362.75	363.5	350.5	360	363.5	347.25	348.5												342.5	337.75	350.5	350.75	385.75	354.25	367.75	343.25	343.25	352.25	359.5	353.25	363.5	360.75	347.5	353.5	350.25
	0.79M	351.75	358.5	344.5	354.5	345.25	344.5	347.25	357.5	334	351.75	341.5	343.75	356.5								357.25	346.75	335.75	342.5	334	345.25	346.5	358.25	348.75	342.5	338.25	347	353.25
	0.68M	350.5	349.75	354.25	354.75	351.25	343.5	361	352.5	347	351.75	347.25	373.5	342.75	351.5							350.5	367.75	337.5	336.75	339.5	358.25	348	346.75	345.25	348	345.75	343.5	347
	0.58M	343.5	340.5	346.5	348.75	337	334.5	346.25	344.25	338.75												358.5	342	345.5	349	344	346.25	343.75	345.75	345.25	336.5	341.25	343.75	345.25	349.25	347
	0.47M	334.25	349	357.5	329.75	331.75	339.75	343	345.75	341.75												336	326.75	354	344.75	339.5	345	339.5	345	336.75	343.25	339.75	336	341.25	342
	0.36M	361.5	340	338.25	340.75	319.75	335.5	335.25	336.75	325.5	340.5	334.25	330.5	349.75	340.5	345.75	335	338.5				344.75	338.5	339	341.25	337.5	336	335.25	337.25	336.25
	0.27M	334.5	335.75	335	337	327.5	333.25	329.5	338.75	334.25	337.75	332	325.75									333.5	326.75	404	339.75	333.25	330.75	332.25	339.5	335	341.5	321.75	339.75	333.75	344	340.25
	0.15M	330.25	334.5	337.25	340.75	327.25	352	331.25	345	329.25	330.25	338.75	335.25	335	336.75	335.25	337.5					332	340	327.25	331.25	334	327.5	345.5	338.75	334.5	341	339.25	332.75	337.25
	Pupal duration	Female																				Male
	1M	105.25	104	109	107.25	104.25	104.5	106	105	106	106.25	105.5										109.25	109.25	107.75	109.75	123	109	111.25	119.75	112	109.5	110	109	109.25	111.5
	0.89M	102.25	105.5	105.5	108.5	104.75	106.75	108.5	101.5	104												108	105.5	110.25	108.75	112	110.5	110	106.75	108	110	110.5	110	112.75	110.75	109.5	108.75	109
	0.79M	102.5	105	106.75	104	102	101.25	106.75	103.25	100.25	104.75	105.25	103.25	109.25								109.25	110.25	108.5	109.25	104.5	109.75	104.75	112.75	108.5	101.5	108.5	108.25	110.5
	0.68M	108.5	106	110	108.75	106.75	107.75	119	107.25	106	110.25	111	110.5	105.75	110.25							112.75	120	108.5	108	110.25	114.75	109.5	109.75	111.25	110.75	110.5	109.5	113.25
	0.58M	107.25	105	106.75	106.25	104.25	103.75	108.5	107.75	105.5												111.5	111.25	112.75	110.25	111.25	109.5	115.75	112.25	110.5	111	108.5	110.25	110	112.25	111.5
	0.47M	103.5	106.75	108.75	103.25	103.75	106.5	107.5	106	106												110.25	110	112.5	111.25	109.75	110	110.75	110.5	111.75	103	110.75	111.5	110.25	115.5
	0.36M	113	109	108.25	106.75	102.5	106.5	106.5	107.5	106.5	109	108	108.25	109.5	107.25	111.25	109.25	108.25				113.75	113.75	115.75	111.75	112.75	111.25	113.5	115.75	112.25
	0.27M	106.5	108.75	106	108.5	106.75	108.25	105.25	112.25	109.25	107.5	105.5	105.25									111.5	110	117.75	115.25	111.25	111.75	111.25	112.25	111	112.25	108.75	112	110.25	112	112.5
	0.15M	106.75	107.75	108.5	106.75	105.75	109	105.75	106	105.75	105.5	109.5	107.75	109.25	109.5	107.75	106.25					111.75	113.75	109.5	112.25	112.5	109.5	112	113.5	113.25	114.25	113.5	113	113.75
	N	Female	Male
	1M	11	14
	0.89M	9	17
	0.79M	13	13
	0.68M	14	13
	0.58M	9	15
	0.47M	9	14
	0.36M	17	9
	0.27M	12	15
	0.15M	16	13
