# Supplementary material for: The Drosophila Individual Activity Monitoring and Detection System (DIAMonDS)
Source: eLife. 2020 Nov 10;9:e58630. doi: 10.7554/eLife.58630 (PMC7655107; doi:10.7554/eLife.58630)
Supplement: Figure 4—figure supplement 1—source data 1. [file elife-58630-fig4-figsupp1-data1.xlsx]

## Sheet: Fig.4-Sup.1
	Visual handling	Sapphire
Frame	88	87
	80	87
	164	163
	96	99
	164	163
	188	170
	224	221
	112	112
	188	185
	200	193
	192	190
	176	172
	136	134
	232	225
	68	63
	96	96
	204	198
	204	198
	132	134
	156	153
	196	195
	128	122
	156	150
	152	150
	184	182
	176	183
	168	172
	152	146
	128	127
	152	152
	192	193
	120	118
	168	170
	112	115
	108	107
	172	163
	100	96
	176	179
	92	78
	228	222
	172	166
	176	169
	128	118
	201	193
	88	89
	188	183
	100	99
	108	112
	176	177
	176	177
	144	143
	148	150
	216	211
	136	132
	144	144
	176	165
	140	136
	196	188
	168	164
	168	163
	205	194
	192	183
	164	157
	164	159
	132	134
	72	71
	44	46
	148	150
	172	164
	144	142
	232	228
	200	192
	156	159
	132	124
	192	185
	96	96
	88	89
	140	140
	108	115
	168	165
	192	185
	224	220
	176	181
	88	87
	176	169
	176	177
	88	84
	144	140
	152	152
	84	81
	184	180
	140	137
	196	192
	224	221
	80	80
	160	161
	160	142
	168	162
	224	224
	144	149
	184	171
	192	188
	208	201
	58	42
	160	144
	160	163
	208	205
	80	78
	152	149
	200	198
	208	207
	136	133
	216	207
	176	172
	62	53
	230	223
	92	79
	196	187
	192	182
	88	79
	228	221
	132	131
	195	178
	192	189
	200	203
	80	59
	204	199
	208	200
	224	221
	180	165
	172	165
	112	107
	136	136
	156	151
	184	176
	176	162
	112	114
	216	216
	204	193
	108	106
	56	50
	80	74
	160	154
	76	78
	128	128
	184	180
	128	125
	148	149
	116	112
	192	185
	216	214
	196	193
	176	173
	168	166
	128	124
	176	168
	192	186
	196	194
	88	87
	144	139
	212	210
	208	206
	180	173
	91	70
	152	151
	76	73
	96	95
	152	140
	140	147
	192	189
	156	145
	124	123
	176	174
	152	153
	104	100
	192	191
	192	183
	184	173
	144	136
	208	203
	136	129
	224	217
	172	169
	208	200
	112	114
	184	174
	168	153
	96	96
	152	148
	168	163
	180	174
	132	131
	140	135
	136	134
	168	166
	60	61
	168	171
	176	169
	184	180
	88	82
	152	149
	208	198
	176	177
	192	189
	180	178
	171	153
	184	187
	160	159
	116	114
	60	48
	176	168
	192	189
	206	204
	160	161
	128	122
	176	175
	132	133
	144	147
	144	137
	192	184
	144	148
	156	157
	168	169
	172	175
	140	142
	200	197
	184	189
	192	189
	148	149
	144	144
	192	184
	176	179
	184	177
	184	168
	192	188
	68	69
	136	135
	88	92
	196	191
	176	170
	148	149
	140	131
	216	218
	96	95
	156	154
	184	183
	152	153
	136	135
	156	157
	216	210
	192	191
	128	127
	192	188
	184	181
	184	176
	92	93
	172	168
	116	107
	122	112
	184	190
	132	132
	156	153
	176	175
	128	124
	136	134
	184	180
	80	74
	87	72
	164	163
	128	124
	192	193
	124	121
	156	147
	128	126
	176	179
	168	171
	88	89
	180	179
	144	148
	200	190
	188	182
	160	158
	176	166
	140	136
	136	136
	160	156
	168	163
	168	166
	212	216
	108	102
	164	165
	60	62
	156	155
	116	112
	176	167
	128	128
	144	143
	88	85
	100	102
	152	151
	80	77
	180	175
	84	79
	252	247
	184	178
	184	179
	136	132
	192	184
	100	96
	204	197
	188	175
	108	107
	104	101
	108	108
	148	148
	164	156
	148	149
	88	86
	140	133
	168	155
	136	134
	243	235
	96	91
	136	139
	100	97
	144	141
	184	179
	140	143
	216	218
	184	180
	168	174
	168	164
	192	189
	216	208
	132	130
	60	60
	128	132
	96	100
	108	102
	144	141
	208	197
	92	91
	180	181
	100	100
	156	159
	168	170
	124	127
	68	69
	156	159
	184	184
	148	144
	172	165
	97	85
	192	188
	80	74
	112	111
	144	149
	68	69
	168	168
	164	159
	99	92
	96	92
	200	197
	92	99
	135	129
	224	213
	160	160
	108	111
	184	174
	146	134
	128	127
	220	215
	156	154
	188	184
	188	188
	108	108
	132	118
	96	93
	92	85
	188	187
	164	164
	152	148
