# Supplementary material for: The Drosophila Individual Activity Monitoring and Detection System (DIAMonDS)
Source: eLife. 2020 Nov 10;9:e58630. doi: 10.7554/eLife.58630 (PMC7655107; doi:10.7554/eLife.58630)
Supplement: Figure 4—figure supplement 2—source data 1. [file elife-58630-fig4-figsupp2-data1.xlsx]

## Sheet: Fig4-Sup.2A,2B,2C
n	96	96	96	96		n	48	48	48	48	48	48	48	48		n	48	48	48	48	48	48	48	48
	i	ii	iii	iv			i	ii	iii	iv	v	vi	vii	viii			i	ii	iii	iv	v	vi	vii	viii
	22.9	48.2	51.2	46.9			22.9	34.8	44.1	37.1	51.2	47.6	45.1	34.5			22.9	42.4	42.6	58.2	48.2	49.4	34.5	17.4
	23.9	50.2	51.7	47.4			23.9	19.1	30.2	41.8	51.7	57.7	45.4	53.7			52.2	42.6	28.7	39.1	42.4	55	27.5	19.7
	42.4	49.4	34.8	46.1			42.4	12.6	28	58.2	34.8	46.6	36.8	44.6			24.7	29	48.9	40.3	32.5	46.9	19.7	32.5
	25.7	44.6	39.8	37.8			25.7	38.8	42.9	38.6	39.8	22.9	38.6	14.4			34.8	12.6	42.9	59	41.3	48.2	22.9	29.7
	42.6	34.5	49.9	32.3			42.6	42.9	25.7	45.9	49.9	43.9	54.2	57.5			33.8	35.8	16.6	44.1	22.7	51.7	48.9	39.8
	44.9	59	32	39.1			44.9	37.1	46.1	48.4	32	46.1	34.5	20.7			34.5	34.3	24.4	25.7	45.9	56.2	45.1	48.9
	58.2	17.4	39.6	49.9			58.2	59	22.2	52.2	39.6	22.4	37.3	48.7			44.1	28	25.7	22.2	43.6	30.8	23.4	26.5
	29.5	24.9	39.1	30.8			29.5	50.9	58.2	6.03	39.1	36	42.4	48.9			36	53.4	19.9	19.1	38.1	48.4	32.3	39.8
	44.1	43.6	45.1	36			48.2	41.3	43.6	10.3	46.9	39.3	36	21.2			42.1	55.2	42.9	40.6	43.4	37.6	27.2	20.4
	30.2	44.1	45.4	48.9			50.2	32.5	44.1	38.1	47.4	21.4	48.9	57.2			37.1	58.2	45.9	52.2	10.3	42.1	20.7	51.7
	28	30.8	36.8	42.6			49.4	48.2	30.8	42.1	46.1	46.4	42.6	34.5			44.9	50.7	49.4	37.6	46.4	43.6	18.6	24.4
	42.9	49.9	38.6	42.4			44.6	25.5	49.9	53.4	37.8	36.3	42.4	45.9			37.6	25.2	20.2	38.8	43.9	24.4	51.7	33.8
	25.7	23.4	54.2	50.4			34.5	22.9	23.4	20.7	32.3	49.9	50.4	49.2			51.2	34.8	49.9	39.6	46.9	46.1	32.3	49.9
	46.1	47.6	34.5	47.4			59	37.6	47.6	38.6	39.1	57.2	47.4	52.4			20.9	47.1	38.6	48.7	49.4	43.4	43.9	49.9
	22.2	26.5	37.3	40.8			17.4	29.7	26.5	51.7	49.9	21.4	40.8	16.6			31.5	33	45.1	46.9	38.1	47.6	43.1	35
	58.2	29	42.4	41.1			24.9	43.1	29	53.4	30.8	41.8	41.1	51.7			47.6	46.6	43.9	22.4	39.3	46.4	49.9	21.4
	34.8	41.3	47.6	39.3			52.2	33.8	36	44.9	20.9	41.1	49.7	44.1			41.1	13.3	48.2	41.3	45.6	38.3	47.6	40.3
	19.1	32.5	57.7	21.4			57.2	35.3	54.7	37.1	33.5	30	47.4	38.8			33.8	34.3	27	51.4	46.6	41.8	33	41.1
	12.6	48.2	46.6	46.4			42.6	35.8	53.4	50.7	47.1	13.3	44.9	34.3			45.1	36.8	54.2	37.3	36	42.6	50.4	40.8
	38.8	25.5	22.9	36.3			43.4	43.1	45.1	48.4	32.5	43.6	35.3	56			49.7	44.9	51.9	56	51.9	45.1	25.5	41.6
	42.9	22.9	43.9	49.9			28.7	16.6	19.9	49.4	38.6	48.2	51.9	24.4			20.7	46.4	34.8	25.5	47.1	26.5	38.3	38.6
	37.1	37.6	46.1	57.2			35.8	44.4	39.3	38.8	29.2	53.2	34	40.3			34.5	44.6	57.5	48.7	21.2	34.5	49.2	16.6
	59	29.7	22.4	21.4			39.1	44.1	19.1	37.6	48.7	41.3	56	47.9			44.1	34.3	24.4	47.9	35	54.5	32.8	46.9
	50.9	43.1	36	41.8			45.6	46.4	24.9	47.9	55	31.3	43.9	40.1			41.1	45.1	33	40.6	47.4	31	22.7	42.6
	37.1	10.3	34.5	21.2			42.4	22.7	38.1	46.4	49.4	45.6	51.9	35			23.9	25.7	44.9	29.5	50.2	44.6	59	24.9
	41.8	38.1	53.7	57.2			29.7	38.6	38.3	47.1	44.6	34.8	30.5	40.6			57.2	43.4	35.8	45.6	29.7	52.4	14.4	39.6
	58.2	42.1	44.6	34.5			55	51.7	48.4	43.6	43.4	38.3	45.1	54.5			43.6	28.2	34.5	46.1	35	20.7	42.9	50.2
	38.6	53.4	14.4	45.9			52.4	46.1	39.1	48.9	32.5	36	39.6	49.7			19.1	38.8	37.1	50.9	32.5	25.5	37.6	43.1
	45.9	20.7	57.5	49.2			27.5	48.9	32.3	18.6	43.9	47.6	25.5	32.8			35.3	43.1	44.4	46.4	38.6	46.1	46.1	48.4
	48.4	38.6	20.7	52.4			14.4	46.1	45.1	35.3	47.9	38.1	39.1	48.2			40.3	61	36.3	37.1	37.1	46.1	42.9	54
	52.2	51.7	48.7	16.6			19.7	39.8	39.8	24.4	49.9	40.3	41.6	46.9			30.2	42.9	46.1	58.2	44.1	49.9	47.6	29
	6.03	53.4	48.9	51.7			39.6	48.4	26.5	49.7	23.4	44.1	45.4	45.9			54.7	45.1	39.3	24.9	38.3	39.1	45.1	26.5
	52.2	42.4	20.9	49.4			24.7	34.5	42.1	37.6	31.5	33.8	20.7	41.1			43.1	26.7	16.6	29	33.3	22.7	39.3	46.1
	57.2	29.7	33.5	44.6			43.6	40.3	43.1	42.9	38.3	16.4	63.3	29			41.8	38.6	48.4	6.03	38.1	53.4	38.6	53.4
	42.6	55	47.1	43.4			29	34.3	55.2	25.2	33	34.3	46.4	45.1			37.1	48.4	38.8	47.9	47.1	48.9	35.3	49.7
	43.4	52.4	32.5	32.5			28.2	61	26.7	49.9	46.9	26.5	46.9	34.3			42.9	49.9	29.5	18.9	41.8	24.4	25.5	55
	28.7	27.5	38.6	43.9			48.9	24.4	42.9	20.2	45.1	27	34.8	33			51.7	39.8	32	39.1	47.4	37.8	39.1	30.8
	35.8	14.4	29.2	47.9			34.5	36.3	16.6	29.5	23.4	36.8	48.7	55.2			33.5	32.5	29.2	55	44.6	32.5	47.9	23.4
	39.1	19.7	48.7	49.9			40.3	25.7	40.6	38.8	46.9	51.4	25.5	40.6			38.3	46.9	23.4	5.28	49.4	41.3	35	40.3
	45.6	39.6	55	23.4			46.1	37.1	29	18.9	5.28	24.7	51.4	47.6			57.7	22.9	46.1	36	21.4	36.3	57.2	41.8
	36	38.1	49.7	51.9			32.5	45.9	43.4	43.9	38.1	46.6	47.1	47.4			30	43.6	53.2	31.3	34.8	36	38.1	44.1
	54.7	38.3	47.4	30.5			35	37.1	33.3	41.8	49.4	26.2	27.7	28.5			16.4	26.5	36.8	24.7	26.2	44.1	18.6	47.9
	53.4	48.4	44.9	45.1			46.9	56.2	37.6	24.4	47.6	41.8	26.5	31			45.4	38.6	34.5	42.4	48.9	42.4	47.4	41.1
	45.1	39.1	35.3	39.6			20.7	46.1	22.7	24.4	41.3	44.1	28.5	24.4			47.4	35.3	34	43.9	30.5	39.6	39.1	45.4
	19.9	32.3	51.9	25.5			19.7	45.1	27.2	51.7	43.1	33	38.3	22.7			63.3	46.9	48.7	51.4	27.7	28.5	41.3	23.2
	39.3	45.1	34	39.1			42.9	42.9	39.3	25.5	35	18.6	41.3	47.9			53.7	14.4	20.7	48.9	57.2	45.9	52.4	51.7
	19.1	39.8	56	41.6			32.5	48.9	20.4	33.8	35	41.1	38.6	42.6			38.8	56	40.3	40.1	40.6	49.7	48.2	45.9
	24.9	26.5	43.9	45.4			50.2	54	46.1	55	40.3	47.9	23.2	38.6			29	34.3	55.2	47.6	28.5	24.4	47.9	38.6
	33.8	22.7	41.1	45.6
	35.3	38.6	30	34.8
	35.8	51.7	13.3	38.3
	43.1	46.1	43.6	36
	16.6	48.9	48.2	47.6
	44.4	46.1	53.2	38.1
	44.1	39.8	41.3	40.3
	46.4	48.4	31.3	44.1
	44.9	46.4	44.1	35
	37.1	47.1	38.8	40.6
	50.7	43.6	34.3	54.5
	48.4	48.9	56	49.7
	49.4	18.6	24.4	32.8
	38.8	35.3	40.3	48.2
	37.6	24.4	47.9	46.9
	47.9	49.7	40.1	45.9
	24.7	32.5	31.5	38.1
	43.6	35	38.3	49.4
	29	46.9	33	47.6
	28.2	20.7	46.9	41.3
	48.9	19.7	45.1	43.1
	34.5	42.9	23.4	35
	40.3	32.5	46.9	35
	46.1	50.2	5.28	40.3
	42.1	43.4	20.7	47.1
	43.1	33.3	63.3	27.7
	55.2	37.6	46.4	26.5
	26.7	22.7	46.9	28.5
	42.9	27.2	34.8	38.3
	16.6	39.3	48.7	41.3
	40.6	20.4	25.5	38.6
	29	46.1	51.4	23.2
	34.5	45.9	33.8	46.6
	40.3	37.1	16.4	26.2
	34.3	56.2	34.3	41.8
	61	46.1	26.5	44.1
	24.4	45.1	27	33
	36.3	42.9	36.8	18.6
	25.7	48.9	51.4	41.1
	37.1	54	24.7	47.9
	37.6	43.9	41.1	47.4
	42.9	41.8	29	28.5
	25.2	24.4	45.1	31
	49.9	24.4	34.3	24.4
	20.2	51.7	33	22.7
	29.5	25.5	55.2	47.9
	38.8	33.8	40.6	42.6
	18.9	55	47.6	38.6
