# Supplementary material for: The Drosophila Individual Activity Monitoring and Detection System (DIAMonDS)
Source: eLife. 2020 Nov 10;9:e58630. doi: 10.7554/eLife.58630 (PMC7655107; doi:10.7554/eLife.58630)
Supplement: Figure 4—figure supplement 3—source data 1. [file elife-58630-fig4-figsupp3-data1.xlsx]

## Sheet: Fig4-Sup.3
	Fig.4-Sup3A and 3B				Fig.4-Sup3C
	(Frame)				(Hours)
	manual	Sapphire			sapphire	Visual handling
	1793	1791			36.1	36.1408
	3048	3043			61.37	61.4697
	3698	3933			79.35	74.6039
	2704	2751			55.47	54.5258
	3253	3230			65.15	65.6103
	2315	2299			46.35	46.6761
	2458	2457			49.54	49.5628
	4133	4117			83.07	83.3958
	4429	4426			89.32	89.38
	4523	4430			89.4	91.2811
	3977	3948			79.66	80.2431
	3964	4175			84.25	79.9806
	4025	3913			78.95	81.2122
	3963	3792			76.5	79.9603
	3569	3567			71.95	71.9939
	216	126			2.522	4.33694
	4336	4083			82.38	87.5008
	3131	3058			61.67	63.1478
	4609	4602			92.88	93.0194
	4643	4642			93.69	93.7064
	5022	4996			100.8	101.374
	4606	4510			91.02	92.9586
	2863	2861			57.7	57.7358
	2748	2683			54.1	55.4142
	3243	3184			64.22	65.4081
	3800	4057			81.86	76.6647
	3873	3818			77.03	78.1406
	3273	3262			65.79	66.0139
	3321	3280			66.16	66.9836
	3820	3729			75.23	77.0683
	5523	5326			107.5	111.507
	3581	3572			72.05	72.2369
	3815	3796			76.58	76.9675
	3160	3064			61.79	63.7328
	3210	3208			64.7	64.7419
	3983	3960			79.9	80.3644
	2624	2552			51.46	52.9108
	4001	3855			77.78	80.7281
	2693	2617			52.77	54.3036
	2154	2931			59.11	43.425
	2210	2203			44.41	44.5556
	3661	3658			73.79	73.8547
	4718	4555			91.93	95.2239
	2046	2528			50.97	41.245
	3324	3313			66.82	67.0442
	3326	3186			64.26	67.0844
	2293	1845			37.19	46.2317
