# Supplementary material for: The Drosophila Individual Activity Monitoring and Detection System (DIAMonDS)
Source: eLife. 2020 Nov 10;9:e58630. doi: 10.7554/eLife.58630 (PMC7655107; doi:10.7554/eLife.58630)
Supplement: Figure 4—source data 1. [file elife-58630-fig4-data1.xlsx]

## Sheet: Fig.4B,4C,4D
Fig.4B					Fig.4C,4D
	Visual handling	Sapphire			Visual handling	Sapphire
21.9225	1			Frame	88	87
19.9047	1				80	87
41.0914	1				164	163
23.94	1				96	99
41.0914	1				164	163
47.1447	1				188	170
56.2247	1				224	221
27.9756	1				112	112
47.1447	1				188	185
50.1714	1				200	193
48.1536	1				192	190
44.1181	1				176	172
34.0289	1				136	134
58.2425	1				232	225
16.8781	1				68	63
23.94	1				96	96
51.1803	1				204	198
51.1803	1				204	198
33.02	1				132	134
39.0736	1				156	153
49.1625	1				196	195
32.0111	1				128	122
39.0736	1				156	150
38.0647	1				152	150
46.1358	1				184	182
44.1181	1				176	183
42.1003	1				168	172
38.0647	1				152	146
32.0111	1				128	127
38.0647	1				152	152
48.1536	1				192	193
29.9933	1				120	118
42.1003	1				168	170
27.9756	1				112	115
26.9667	1				108	107
43.1092	1				172	163
24.9489	1				100	96
44.1181	1				176	179
22.9314	1				92	78
57.2336	1				228	222
43.1092	1				172	166
44.1181	1				176	169
32.0111	1				128	118
50.4233	1				201	193
21.9225	1				88	89
47.1447	1				188	183
24.9489	1				100	99
26.9667	1				108	112
44.1181	1				176	177
44.1181	1				176	177
36.0467	1				144	143
37.0558	1				148	150
54.2069	1				216	211
34.0289	1				136	132
36.0467	1				144	144
44.1181	1				176	165
35.0378	1				140	136
49.1625	1				196	188
42.1003	1				168	164
42.1003	1				168	163
51.4322	1				205	194
48.1536	1				192	183
41.0914	1				164	157
41.0914	1				164	159
33.02	1				132	134
17.8869	1				72	71
10.8247	1				44	46
37.0558	1				148	150
43.1092	1				172	164
36.0467	1				144	142
58.2425	1				232	228
50.1714	1				200	192
39.0736	1				156	159
33.02	1				132	124
48.1536	1				192	185
23.94	1				96	96
21.9225	1				88	89
35.0378	1				140	140
26.9667	1				108	115
42.1003	1				168	165
48.1536	1				192	185
56.2247	1				224	220
44.1181	1				176	181
21.9225	1				88	87
44.1181	1				176	169
44.1181	1				176	177
21.9225	1				88	84
36.0467	1				144	140
38.0647	1				152	152
20.9136	1				84	81
46.1358	1				184	180
35.0378	1				140	137
49.1625	1				196	192
56.2247	1				224	221
19.9047	1				80	80
40.0825	1				160	161
40.0825	1				160	142
42.1003	1				168	162
56.2247	1				224	224
36.0467	1				144	149
46.1358	1				184	171
48.1536	1				192	188
52.1892	1				208	201
14.3558	1
40.0825	1				58	42
40.0825	1				160	144
52.1892	1				160	163
19.9047	1				208	205
38.0647	1				80	78
50.1714	1				152	149
52.1892	1				200	198
34.0289	1				208	207
54.2069	1				136	133
44.1181	1				216	207
15.3647	1				176	172
57.7381	1				62	53
22.9314	1				230	223
49.1625	1				92	79
48.1536	1				196	187
21.9225	1				192	182
57.2336	1				88	79
33.02	1				228	221
48.9103	1				132	131
48.1536	1				195	178
50.1714	1				192	189
19.9047	1				200	203
51.1803	1				80	59
52.1892	1				204	199
56.2247	1				208	200
45.1269	1				224	221
43.1092	1				180	165
27.9756	1				172	165
34.0289	1				112	107
39.0736	1				136	136
46.1358	1				156	151
44.1181	1				184	176
27.9756	1				176	162
54.2069	1				112	114
51.1803	1				216	216
26.9667	1				204	193
13.8514	1				108	106
19.9047	1				56	50
40.0825	1				80	74
18.8958	1				160	154
32.0111	1				76	78
46.1358	1				128	128
32.0111	1				184	180
37.0558	1				128	125
28.9847	1				148	149
48.1536	1				116	112
54.2069	1				192	185
49.1625	1				216	214
44.1181	1				196	193
42.1003	1				176	173
32.0111	1				168	166
44.1181	1				128	124
48.1536	1				176	168
49.1625	1				192	186
21.9225	1				196	194
36.0467	1				88	87
53.1981	1				144	139
52.1892	1				212	210
45.1269	1				208	206
22.6792	1				180	173
38.0647	1				91	70
18.8958	1				152	151
23.94	1				76	73
38.0647	1				96	95
35.0378	1				152	140
48.1536	1				140	147
39.0736	1				192	189
31.0022	1				156	145
44.1181	1				124	123
38.0647	1				176	174
25.9578	1				152	153
48.1536	1				104	100
48.1536	1				192	191
46.1358	1				192	183
36.0467	1				184	173
52.1892	1				144	136
34.0289	1				208	203
56.2247	1				136	129
43.1092	1				224	217
52.1892	1				172	169
27.9756	1				208	200
46.1358	1				112	114
42.1003	1				184	174
23.94	1				168	153
38.0647	1				96	96
42.1003	1				152	148
45.1269	1				168	163
33.02	1				180	174
35.0378	1				132	131
34.0289	1				140	135
42.1003	1				136	134
14.86	1				168	166
42.1003	1				60	61
44.1181	1				168	171
46.1358	1				176	169
21.9225	1				184	180
38.0647	1				88	82
52.1892	1				152	149
44.1181	1				208	198
48.1536	1				176	177
45.1269	1				192	189
42.8567	1				180	178
46.1358	1				171	153
40.0825	1				184	187
28.9847	1				160	159
14.86	1				116	114
44.1181	1				60	48
48.1536	1				176	168
51.6847	1				192	189
40.0825	1				206	204
32.0111	1				160	161
44.1181	1				128	122
33.02	1				176	175
36.0467	1				132	133
36.0467	1				144	147
48.1536	1				144	137
36.0467	1				192	184
39.0736	1				144	148
42.1003	1				156	157
43.1092	1				168	169
35.0378	1				172	175
50.1714	1				140	142
46.1358	1				200	197
48.1536	1				184	189
37.0558	1				192	189
36.0467	1				148	149
48.1536	1				144	144
44.1181	1				192	184
46.1358	1				176	179
46.1358	1				184	177
48.1536	1				184	168
16.8781	1				192	188
34.0289	1				68	69
21.9225	1				136	135
49.1625	1				88	92
44.1181	1				196	191
37.0558	1				176	170
35.0378	1				148	149
54.2069	1				140	131
23.94	1				216	218
39.0736	1				96	95
46.1358	1				156	154
38.0647	1				184	183
34.0289	1				152	153
39.0736	1				136	135
54.2069	1				156	157
48.1536	1				216	210
32.0111	1				192	191
48.1536	1				128	127
46.1358	1				192	188
46.1358	1				184	181
22.9314	1				184	176
43.1092	1				92	93
28.9847	1				172	168
30.4978	1				116	107
46.1358	1				122	112
33.02	1				184	190
39.0736	1				132	132
44.1181	1				156	153
32.0111	1				176	175
34.0289	1				128	124
46.1358	1				136	134
19.9047	1				184	180
21.6703	1				80	74
41.0914	1				87	72
32.0111	1				164	163
48.1536	1				128	124
31.0022	1				192	193
39.0736	1				124	121
32.0111	1				156	147
44.1181	1				128	126
42.1003	1				176	179
21.9225	1				168	171
45.1269	1				88	89
36.0467	1				180	179
50.1714	1
47.1447	1				144	148
40.0825	1				200	190
44.1181	1				188	182
35.0378	1				160	158
34.0289	1				176	166
40.0825	1				140	136
42.1003	1				136	136
42.1003	1				160	156
53.1981	1				168	163
26.9667	1				168	166
41.0914	1				212	216
14.86	1				108	102
39.0736	1				164	165
28.9847	1				60	62
44.1181	1				156	155
32.0111	1				116	112
36.0467	1				176	167
21.9225	1				128	128
24.9489	1				144	143
38.0647	1				88	85
19.9047	1				100	102
45.1269	1				152	151
20.9136	1				80	77
63.2869	1				180	175
46.1358	1				84	79
46.1358	1				252	247
34.0289	1				184	178
48.1536	1				184	179
24.9489	1				136	132
51.1803	1				192	184
47.1447	1				100	96
26.9667	1				204	197
25.9578	1				188	175
26.9667	1				108	107
37.0558	1				104	101
41.0914	1				108	108
37.0558	1				148	148
21.9225	1				164	156
35.0378	1				148	149
42.1003	1				88	86
34.0289	1				140	133
61.0169	1				168	155
23.94	1				136	134
34.0289	1				243	235
24.9489	1				96	91
36.0467	1				136	139
46.1358	1				100	97
35.0378	1				144	141
54.2069	1				184	179
46.1358	1				140	143
42.1003	1				216	218
42.1003	1				184	180
48.1536	1				168	174
54.2069	1				168	164
33.02	1				192	189
14.86	1				216	208
32.0111	1				132	130
23.94	1				60	60
26.9667	1				128	132
36.0467	1				96	100
52.1892	1				108	102
22.9314	1				144	141
45.1269	1				208	197
24.9489	1				92	91
39.0736	1				180	181
42.1003	1				100	100
31.0022	1				156	159
16.8781	1				168	170
39.0736	1				124	127
46.1358	1				68	69
37.0558	1				156	159
43.1092	1				184	184
24.1925	1				148	144
48.1536	1				172	165
19.9047	1				97	85
27.9756	1				192	188
36.0467	1				80	74
16.8781	1				112	111
42.1003	1				144	149
41.0914	1				68	69
24.6969	1				168	168
23.94	1				164	159
50.1714	1				99	92
22.9314	1				96	92
33.7769	1				200	197
56.2247	1				92	99
40.0825	1				135	129
26.9667	1				224	213
46.1358	1				160	160
36.5511	1				108	111
32.0111	1				184	174
55.2158	1				146	134
39.0736	1				128	127
47.1447	1				220	215
47.1447	1				156	154
26.9667	1				188	184
33.02	1				188	188
23.94	1				108	108
22.9314	1				132	118
47.1447	1				96	93
41.0914	1				92	85
38.0647	1				188	187
21.6703		1			164	164
21.6703		1			152	148
40.8389		1
24.6969		1
40.8389		1
42.6047		1
55.4678		1
27.9756		1
46.3878		1
48.4058		1
47.6492		1
43.1092		1
33.5244		1
56.4767		1
15.6167		1
23.94		1
49.6669		1
49.6669		1
33.5244		1
38.3169		1
48.9103		1
30.4978		1
37.5603		1
37.5603		1
45.6314		1
45.8836		1
43.1092		1
36.5511		1
31.7592		1
38.0647		1
48.4058		1
29.4889		1
42.6047		1
28.7325		1
26.7147		1
40.8389		1
23.94		1
44.8744		1
19.4003		1
55.7203		1
41.5958		1
42.3525		1
29.4889		1
48.4058		1
22.1747		1
45.8836		1
24.6969		1
27.9756		1
44.37		1
44.37		1
35.7947		1
37.5603		1
52.9456		1
33.02		1
36.0467		1
41.3433		1
34.0289		1
47.1447		1
41.0914		1
40.8389		1
48.6581		1
45.8836		1
39.3256		1
39.83		1
33.5244		1
17.6344		1
11.3292		1
37.5603		1
41.0914		1
35.5425		1
57.2336		1
48.1536		1
39.83		1
31.0022		1
46.3878		1
23.94		1
22.1747		1
35.0378		1
28.7325		1
41.3433		1
46.3878		1
55.2158		1
45.3789		1
21.6703		1
42.3525		1
44.37		1
20.9136		1
35.0378		1
38.0647		1
20.1567		1
45.1269		1
34.2814		1
48.1536		1
55.4678		1
19.9047		1
40.3344		1
35.5425		1
40.5869		1
56.2247		1
37.3081		1
42.8567		1
47.1447		1
50.4233		1
10.32		1
36.0467		1
40.8389		1
51.4322		1
19.4003		1
37.3081		1
49.6669		1
51.9367		1
33.2725		1
51.9367		1
43.1092		1
13.0947		1
55.9722		1
19.6525		1
46.8925		1
45.6314		1
19.6525		1
55.4678		1
32.7681		1
44.6225		1
47.3969		1
50.9278		1
14.6081		1
49.9192		1
50.1714		1
55.4678		1
41.3433		1
41.3433		1
26.7147		1
34.0289		1
37.8125		1
44.1181		1
40.5869		1
28.48		1
54.2069		1
48.4058		1
26.4625		1
12.3381		1
18.3914		1
38.5692		1
19.4003		1
32.0111		1
45.1269		1
31.2547		1
37.3081		1
27.9756		1
46.3878		1
53.7025		1
48.4058		1
43.3611		1
41.5958		1
31.0022		1
42.1003		1
46.6403		1
48.6581		1
21.6703		1
34.7858		1
52.6936		1
51.6847		1
43.3611		1
17.3825		1
37.8125		1
18.1392		1
23.6881		1
35.0378		1
36.8036		1
47.3969		1
36.2992		1
30.7503		1
43.6136		1
38.3169		1
24.9489		1
47.9014		1
45.8836		1
43.3611		1
34.0289		1
50.9278		1
32.2636		1
54.4589		1
42.3525		1
50.1714		1
28.48		1
43.6136		1
38.3169		1
23.94		1
37.0558		1
40.8389		1
43.6136		1
32.7681		1
33.7769		1
33.5244		1
41.5958		1
15.1125		1
42.8567		1
42.3525		1
45.1269		1
20.4092		1
37.3081		1
49.6669		1
44.37		1
47.3969		1
44.6225		1
38.3169		1
46.8925		1
39.83		1
28.48		1
11.8333		1
42.1003		1
47.3969		1
51.1803		1
40.3344		1
30.4978		1
43.8656		1
33.2725		1
36.8036		1
34.2814		1
46.1358		1
37.0558		1
39.3256		1
42.3525		1
43.8656		1
35.5425		1
49.4144		1
47.3969		1
47.3969		1
37.3081		1
36.0467		1
46.1358		1
44.8744		1
44.37		1
42.1003		1
47.1447		1
17.1303		1
33.7769		1
22.9314		1
47.9014		1
42.6047		1
37.3081		1
32.7681		1
54.7114		1
23.6881		1
38.5692		1
45.8836		1
38.3169		1
33.7769		1
39.3256		1
52.6936		1
47.9014		1
31.7592		1
47.1447		1
45.3789		1
44.1181		1
23.1836		1
42.1003		1
26.7147		1
27.9756		1
47.6492		1
33.02		1
38.3169		1
43.8656		1
31.0022		1
33.5244		1
45.1269		1
18.3914		1
17.8869		1
40.8389		1
31.0022		1
48.4058		1
30.2458		1
36.8036		1
31.5067		1
44.8744		1
42.8567		1
22.1747		1
44.8744		1
37.0558		1
47.6492		1
45.6314		1
39.5781		1
41.5958		1
34.0289		1
34.0289		1
39.0736		1
40.8389		1
41.5958		1
54.2069		1
25.4536		1
41.3433		1
15.3647		1
38.8211		1
27.9756		1
41.8478		1
32.0111		1
35.7947		1
21.1656		1
25.4536		1
37.8125		1
19.1481		1
43.8656		1
19.6525		1
62.0258		1
44.6225		1
44.8744		1
33.02		1
46.1358		1
23.94		1
49.4144		1
43.8656		1
26.7147		1
25.2014		1
26.9667		1
37.0558		1
39.0736		1
37.3081		1
21.4181		1
33.2725		1
38.8211		1
33.5244		1
58.9992		1
22.6792		1
34.7858		1
24.1925		1
35.2903		1
44.8744		1
35.7947		1
54.7114		1
45.1269		1
43.6136		1
41.0914		1
47.3969		1
52.1892		1
32.5156		1
14.86		1
33.02		1
24.9489		1
25.4536		1
35.2903		1
49.4144		1
22.6792		1
45.3789		1
24.9489		1
39.83		1
42.6047		1
31.7592		1
17.1303		1
39.83		1
46.1358		1
36.0467		1
41.3433		1
21.1656		1
47.1447		1
18.3914		1
27.7236		1
37.3081		1
17.1303		1
42.1003		1
39.83		1
22.9314		1
22.9314		1
49.4144		1
24.6969		1
32.2636		1
53.45		1
40.0825		1
27.7236		1
43.6136		1
33.5244		1
31.7592		1
53.9544		1
38.5692		1
46.1358		1
47.1447		1
26.9667		1
29.4889		1
23.1836		1
21.1656		1
46.8925		1
41.0914		1
37.0558		1

## Sheet: Fig.4E
N	384	383	373
	Plate 1	Plate 2	Plate 3
0.968056	1
0.968056		1
0.968056			1
5.5475			1
7.07361		1
7.5825		1
7.83694			1
13.18	1
14.4517	1
17.2497	1
18.5219	1
18.5219		1
20.8117	1
20.8117		1
21.0658		1
21.3203		1
22.3378		1
22.3378			1
23.6094		1
23.6094		1
23.6094			1
23.8639	1
23.8639			1
23.8639			1
24.1181	1
24.1181			1
24.1181			1
24.3725		1
24.3725			1
24.6267		1
24.8811	1
24.8811			1
25.3897			1
25.6442			1
25.8986		1
25.8986		1
26.1528			1
26.6617			1
26.9161	1
27.4247	1
27.4247		1
27.6792	1
27.6792		1
27.6792		1
28.1883	1
28.4425	1
28.4425		1
28.6969	1
28.6969			1
28.9511	1
28.9511	1
29.2056	1
29.2056		1
29.2056		1
29.2056		1
29.2056			1
29.4597	1
29.4597		1
29.4597			1
29.4597			1
29.7139		1
29.7139			1
29.7139			1
29.9683	1
29.9683			1
30.2228	1
30.4772	1
30.4772	1
30.4772		1
30.4772		1
30.7314		1
30.7314			1
30.9858	1
30.9858		1
31.2403	1
31.2403	1
31.2403	1
31.2403		1
31.2403		1
31.2403			1
31.4944	1
31.4944	1
31.4944			1
31.7489	1
31.7489		1
31.7489		1
31.7489		1
31.7489			1
31.7489			1
31.7489			1
32.0033	1
32.0033	1
32.0033		1
32.0033		1
32.0033		1
32.0033			1
32.0033			1
32.0033			1
32.0033			1
32.2578	1
32.2578		1
32.2578			1
32.2578			1
32.2578			1
32.2578			1
32.5122	1
32.5122	1
32.5122	1
32.5122	1
32.5122	1
32.5122			1
32.7667	1
32.7667	1
32.7667		1
32.7667			1
33.0211	1
33.0211		1
33.0211		1
33.0211		1
33.0211			1
33.0211			1
33.0211			1
33.2756	1
33.2756	1
33.2756		1
33.2756		1
33.2756		1
33.2756			1
33.2756			1
33.2756			1
33.2756			1
33.2756			1
33.53	1
33.53			1
33.7842		1
33.7842			1
33.7842			1
34.0386	1
34.0386	1
34.0386	1
34.0386	1
34.0386	1
34.0386	1
34.0386	1
34.0386			1
34.0386			1
34.0386			1
34.0386			1
34.2931	1
34.2931		1
34.2931		1
34.2931		1
34.2931			1
34.5475	1
34.5475		1
34.5475		1
34.5475			1
34.8019	1
34.8019		1
34.8019		1
35.0564	1
35.0564	1
35.0564	1
35.0564			1
35.0564			1
35.0564			1
35.3108	1
35.3108	1
35.3108	1
35.3108	1
35.3108	1
35.3108			1
35.3108			1
35.3108			1
35.5653	1
35.5653	1
35.5653	1
35.5653		1
35.5653		1
35.5653		1
35.5653			1
35.5653			1
35.5653			1
35.82	1
35.82	1
35.82	1
35.82	1
35.82	1
35.82	1
35.82	1
35.82	1
35.82	1
35.82		1
35.82		1
35.82		1
35.82		1
35.82			1
35.82			1
35.82			1
35.82			1
35.82			1
36.0742	1
36.0742	1
36.0742		1
36.0742			1
36.0742			1
36.0742			1
36.0742			1
36.3286	1
36.3286	1
36.3286	1
36.3286		1
36.3286			1
36.3286			1
36.3286			1
36.3286			1
36.3286			1
36.5831	1
36.5831	1
36.5831	1
36.5831	1
36.5831	1
36.5831			1
36.5831			1
36.5831			1
36.5831			1
36.8375	1
36.8375	1
36.8375	1
36.8375		1
36.8375		1
36.8375		1
36.8375		1
36.8375		1
36.8375		1
36.8375		1
36.8375			1
36.8375			1
36.8375			1
36.8375			1
36.8375			1
36.8375			1
37.0919	1
37.0919	1
37.0919	1
37.0919	1
37.0919		1
37.0919		1
37.0919		1
37.0919		1
37.0919			1
37.0919			1
37.0919			1
37.3464	1
37.3464	1
37.3464	1
37.3464	1
37.3464	1
37.3464	1
37.3464	1
37.3464		1
37.3464		1
37.3464		1
37.3464			1
37.3464			1
37.3464			1
37.6006	1
37.6006	1
37.6006	1
37.6006	1
37.6006	1
37.6006	1
37.6006	1
37.6006		1
37.6006		1
37.6006		1
37.6006		1
37.6006		1
37.6006		1
37.6006		1
37.6006		1
37.6006			1
37.855	1
37.855	1
37.855	1
37.855		1
37.855			1
37.855			1
37.855			1
37.855			1
37.855			1
37.855			1
38.1094	1
38.1094	1
38.1094	1
38.1094	1
38.1094	1
38.1094	1
38.1094	1
38.1094	1
38.1094		1
38.1094		1
38.1094		1
38.1094		1
38.1094			1
38.1094			1
38.3639	1
38.3639		1
38.3639		1
38.3639		1
38.3639		1
38.3639		1
38.3639			1
38.3639			1
38.6183	1
38.6183	1
38.6183	1
38.6183		1
38.6183		1
38.6183		1
38.6183		1
38.6183		1
38.6183		1
38.6183		1
38.6183			1
38.6183			1
38.6183			1
38.6183			1
38.8728	1
38.8728	1
38.8728	1
38.8728	1
38.8728	1
38.8728	1
38.8728	1
38.8728	1
38.8728	1
38.8728	1
38.8728		1
38.8728		1
38.8728		1
38.8728			1
38.8728			1
38.8728			1
38.8728			1
39.1272	1
39.1272	1
39.1272	1
39.1272	1
39.1272	1
39.1272	1
39.1272	1
39.1272	1
39.1272	1
39.1272		1
39.1272		1
39.1272			1
39.1272			1
39.3817	1
39.3817	1
39.3817	1
39.3817	1
39.3817	1
39.3817	1
39.3817	1
39.3817			1
39.3817			1
39.3817			1
39.3817			1
39.3817			1
39.3817			1
39.6361	1
39.6361	1
39.6361	1
39.6361	1
39.6361	1
39.6361	1
39.6361		1
39.6361		1
39.6361		1
39.6361			1
39.6361			1
39.6361			1
39.6361			1
39.6361			1
39.8906	1
39.8906	1
39.8906	1
39.8906		1
39.8906		1
39.8906		1
39.8906		1
39.8906			1
39.8906			1
39.8906			1
40.145	1
40.145	1
40.145	1
40.145	1
40.145	1
40.145		1
40.145		1
40.145			1
40.145			1
40.145			1
40.3992	1
40.3992	1
40.3992		1
40.3992		1
40.3992		1
40.3992		1
40.3992		1
40.3992			1
40.3992			1
40.3992			1
40.3992			1
40.6536	1
40.6536	1
40.6536	1
40.6536		1
40.6536		1
40.6536		1
40.6536			1
40.6536			1
40.6536			1
40.6536			1
40.6536			1
40.9081	1
40.9081	1
40.9081	1
40.9081	1
40.9081	1
40.9081	1
40.9081		1
40.9081		1
40.9081			1
40.9081			1
40.9081			1
41.1628	1
41.1628	1
41.1628		1
41.1628		1
41.1628		1
41.1628			1
41.1628			1
41.1628			1
41.1628			1
41.1628			1
41.4169	1
41.4169	1
41.4169	1
41.4169	1
41.4169	1
41.4169	1
41.4169	1
41.4169	1
41.4169		1
41.4169		1
41.4169			1
41.4169			1
41.4169			1
41.4169			1
41.4169			1
41.4169			1
41.6714	1
41.6714	1
41.6714	1
41.6714	1
41.6714	1
41.6714	1
41.6714	1
41.6714		1
41.6714		1
41.6714		1
41.6714		1
41.6714			1
41.6714			1
41.6714			1
41.6714			1
41.6714			1
41.9258	1
41.9258	1
41.9258		1
41.9258		1
41.9258		1
41.9258		1
41.9258			1
41.9258			1
41.9258			1
41.9258			1
41.9258			1
41.9258			1
42.1803	1
42.1803	1
42.1803	1
42.1803		1
42.1803		1
42.1803		1
42.1803		1
42.1803		1
42.1803		1
42.1803		1
42.1803			1
42.1803			1
42.1803			1
42.1803			1
42.1803			1
42.1803			1
42.1803			1
42.1803			1
42.4344	1
42.4344	1
42.4344	1
42.4344	1
42.4344	1
42.4344	1
42.4344	1
42.4344	1
42.4344		1
42.4344		1
42.4344		1
42.4344		1
42.4344		1
42.4344		1
42.4344		1
42.4344			1
42.4344			1
42.6889	1
42.6889	1
42.6889		1
42.6889		1
42.6889		1
42.6889		1
42.6889		1
42.6889			1
42.6889			1
42.9433	1
42.9433	1
42.9433	1
42.9433	1
42.9433	1
42.9433	1
42.9433	1
42.9433	1
42.9433	1
42.9433	1
42.9433		1
42.9433		1
42.9433		1
42.9433		1
42.9433		1
42.9433		1
42.9433			1
42.9433			1
42.9433			1
42.9433			1
43.1978	1
43.1978	1
43.1978	1
43.1978		1
43.1978		1
43.1978		1
43.1978		1
43.1978			1
43.1978			1
43.1978			1
43.4519	1
43.4519	1
43.4519		1
43.4519		1
43.4519			1
43.4519			1
43.4519			1
43.4519			1
43.4519			1
43.4519			1
43.4519			1
43.4519			1
43.7067	1
43.7067	1
43.7067	1
43.7067	1
43.7067	1
43.7067		1
43.7067		1
43.7067		1
43.7067		1
43.7067			1
43.7067			1
43.7067			1
43.9608	1
43.9608	1
43.9608	1
43.9608	1
43.9608		1
43.9608		1
43.9608		1
43.9608		1
43.9608		1
43.9608		1
43.9608		1
43.9608		1
43.9608			1
43.9608			1
43.9608			1
43.9608			1
43.9608			1
43.9608			1
44.2153	1
44.2153		1
44.2153		1
44.2153		1
44.2153		1
44.2153			1
44.2153			1
44.2153			1
44.2153			1
44.4694	1
44.4694	1
44.4694	1
44.4694	1
44.4694	1
44.4694		1
44.4694		1
44.4694		1
44.4694		1
44.4694			1
44.4694			1
44.4694			1
44.4694			1
44.4694			1
44.4694			1
44.4694			1
44.4694			1
44.4694			1
44.7239	1
44.7239	1
44.7239	1
44.7239	1
44.7239	1
44.7239	1
44.7239		1
44.7239		1
44.7239		1
44.7239		1
44.7239		1
44.7239		1
44.7239		1
44.7239		1
44.7239		1
44.7239			1
44.7239			1
44.7239			1
44.7239			1
44.9781	1
44.9781	1
44.9781	1
44.9781	1
44.9781	1
44.9781		1
44.9781		1
44.9781		1
44.9781			1
44.9781			1
44.9781			1
45.2325	1
45.2325	1
45.2325	1
45.2325	1
45.2325	1
45.2325	1
45.2325		1
45.2325		1
45.2325		1
45.2325		1
45.2325			1
45.2325			1
45.2325			1
45.2325			1
45.4867	1
45.4867	1
45.4867	1
45.4867	1
45.4867	1
45.4867		1
45.4867			1
45.4867			1
45.4867			1
45.4867			1
45.4867			1
45.4867			1
45.4867			1
45.7411	1
45.7411	1
45.7411	1
45.7411		1
45.7411		1
45.7411		1
45.7411		1
45.7411		1
45.7411		1
45.7411		1
45.7411		1
45.7411		1
45.7411		1
45.7411		1
45.7411			1
45.7411			1
45.9956	1
45.9956	1
45.9956	1
45.9956		1
45.9956		1
45.9956		1
45.9956		1
45.9956			1
45.9956			1
45.9956			1
45.9956			1
46.25	1
46.25	1
46.25	1
46.25	1
46.25	1
46.25		1
46.25		1
46.25		1
46.25		1
46.25		1
46.25		1
46.25		1
46.25			1
46.25			1
46.25			1
46.25			1
46.5044	1
46.5044	1
46.5044	1
46.5044	1
46.5044	1
46.5044		1
46.5044		1
46.5044		1
46.5044		1
46.5044		1
46.5044			1
46.5044			1
46.5044			1
46.7589	1
46.7589	1
46.7589	1
46.7589	1
46.7589	1
46.7589		1
46.7589		1
46.7589		1
46.7589			1
46.7589			1
46.7589			1
47.0133	1
47.0133	1
47.0133	1
47.0133	1
47.0133	1
47.0133		1
47.0133		1
47.0133		1
47.0133		1
47.0133		1
47.0133		1
47.0133			1
47.0133			1
47.0133			1
47.0133			1
47.0133			1
47.0133			1
47.0133			1
47.2678	1
47.2678	1
47.2678	1
47.2678		1
47.2678		1
47.2678		1
47.2678		1
47.2678		1
47.2678		1
47.2678			1
47.2678			1
47.2678			1
47.5222	1
47.5222	1
47.5222	1
47.5222		1
47.5222		1
47.5222		1
47.5222		1
47.5222		1
47.5222		1
47.5222			1
47.5222			1
47.5222			1
47.5222			1
47.7764	1
47.7764	1
47.7764	1
47.7764		1
47.7764		1
47.7764		1
47.7764		1
47.7764			1
47.7764			1
47.7764			1
47.7764			1
47.7764			1
48.0308	1
48.0308	1
48.0308	1
48.0308	1
48.0308	1
48.0308	1
48.0308		1
48.0308		1
48.0308		1
48.0308			1
48.0308			1
48.0308			1
48.0308			1
48.0308			1
48.285	1
48.285	1
48.285		1
48.285		1
48.285		1
48.285			1
48.285			1
48.285			1
48.285			1
48.285			1
48.5394	1
48.5394		1
48.5394		1
48.5394		1
48.5394			1
48.5394			1
48.5394			1
48.5394			1
48.5394			1
48.7936	1
48.7936	1
48.7936	1
48.7936	1
48.7936	1
48.7936		1
48.7936		1
48.7936		1
48.7936		1
48.7936		1
48.7936			1
49.0481	1
49.0481	1
49.0481	1
49.0481	1
49.0481		1
49.0481			1
49.0481			1
49.0481			1
49.0481			1
49.3025	1
49.3025	1
49.3025	1
49.3025	1
49.3025	1
49.3025	1
49.3025		1
49.3025		1
49.3025		1
49.3025			1
49.3025			1
49.3025			1
49.5569	1
49.5569	1
49.5569	1
49.5569	1
49.5569		1
49.5569		1
49.5569		1
49.5569			1
49.5569			1
49.5569			1
49.8111	1
49.8111	1
49.8111	1
49.8111	1
49.8111		1
49.8111		1
49.8111		1
49.8111		1
49.8111			1
49.8111			1
49.8111			1
49.8111			1
49.8111			1
49.8111			1
50.0656	1
50.0656	1
50.0656	1
50.0656	1
50.0656		1
50.0656		1
50.0656		1
50.0656		1
50.0656		1
50.0656			1
50.0656			1
50.0656			1
50.0656			1
50.0656			1
50.32	1
50.32	1
50.32		1
50.32		1
50.32		1
50.32		1
50.32		1
50.32		1
50.32		1
50.32			1
50.32			1
50.32			1
50.5744	1
50.5744	1
50.5744	1
50.5744	1
50.5744	1
50.5744		1
50.5744		1
50.5744		1
50.5744			1
50.8286	1
50.8286	1
50.8286	1
50.8286	1
50.8286		1
50.8286		1
50.8286			1
50.8286			1
50.8286			1
50.8286			1
50.8286			1
50.8286			1
51.0831	1
51.0831	1
51.0831	1
51.0831		1
51.0831		1
51.0831		1
51.0831		1
51.0831			1
51.3375	1
51.3375	1
51.3375		1
51.3375		1
51.3375		1
51.3375			1
51.3375			1
51.5919	1
51.5919		1
51.5919		1
51.8461	1
51.8461	1
51.8461		1
51.8461		1
51.8461		1
51.8461		1
51.8461			1
51.8461			1
52.1006	1
52.1006	1
52.1006	1
52.1006	1
52.1006	1
52.1006		1
52.1006		1
52.1006			1
52.1006			1
52.355	1
52.355	1
52.355		1
52.355		1
52.355		1
52.355		1
52.355		1
52.355			1
52.355			1
52.6092	1
52.6092		1
52.6092		1
52.6092		1
52.6092		1
52.6092		1
52.6092			1
52.6092			1
52.6092			1
52.6092			1
52.8636	1
52.8636	1
52.8636		1
52.8636		1
52.8636			1
52.8636			1
52.8636			1
52.8636			1
52.8636			1
53.1181	1
53.1181	1
53.1181	1
53.1181		1
53.1181		1
53.1181		1
53.1181		1
53.1181		1
53.1181		1
53.1181		1
53.1181		1
53.3725	1
53.3725	1
53.3725	1
53.3725	1
53.3725	1
53.3725		1
53.3725		1
53.3725		1
53.3725		1
53.3725			1
53.3725			1
53.6269	1
53.6269		1
53.6269		1
53.8814		1
53.8814		1
53.8814		1
53.8814			1
53.8814			1
53.8814			1
54.1358	1
54.1358	1
54.1358		1
54.1358			1
54.3903		1
54.3903		1
54.3903		1
54.3903			1
54.3903			1
54.6447	1
54.6447		1
54.6447			1
54.6447			1
54.8992	1
54.8992	1
54.8992	1
54.8992		1
54.8992		1
54.8992		1
55.1536	1
55.1536		1
55.1536			1
55.4081	1
55.4081		1
55.4081			1
55.6625		1
55.6625			1
55.9169		1
55.9169		1
55.9169		1
55.9169		1
55.9169			1
56.1714	1
56.1714		1
56.1714		1
56.1714			1
56.1714			1
56.4258			1
56.4258			1
56.4258			1
56.4258			1
56.4258			1
56.9347		1
56.9347			1
57.1892	1
57.1892		1
57.1892		1
57.1892			1
57.4436	1
57.4436			1
57.6978	1
57.6978		1
57.6978		1
57.6978			1
58.2067	1
58.2067		1
58.2067		1
58.2067			1
58.4611		1
58.4611			1
58.7153		1
58.7153		1
58.7153			1
58.9697		1
59.2242		1
59.4786		1
59.7331		1
59.7331		1
59.7331			1
59.7331			1
59.9875			1
60.4964		1
60.4964			1
60.7508	1
60.7508	1
60.7508	1
60.7508		1
60.7508		1
60.7508			1
61.0053		1
61.0053		1
61.0053			1
61.5142		1
62.2775	1
62.5319			1
62.7864			1
62.7864			1
64.3125			1
64.5669			1
66.0925	1
67.3644			1
70.6717	1
71.6892		1
72.9611		1
73.7242		1
82.1192	1

## Sheet: Fig.4F
N	96	96	96
	Plate 1	plate 2	Plate 3
41.1	1
51.45	1
47.45	1
51.72	1
45.45	1
36.77	1
44.85	1
48.23	1
34.5	1
48.75	1
40.93	1
58.23	1
40.67	1
53.18	1
44.23	1
29.12	1
44.23	1
45.88	1
47.28	1
55.1	1
61.45	1
70.13	1
48.85	1
42.77	1
49.45	1
56.67	1
48.75	1
44.93	1
38.77	1
51.28	1
43.02	1
36.93	1
46.07	1
45.53	1
57.53	1
46.58	1
46.58	1
43.98	1
47.02	1
57.18	1
41.2	1
42.5	1
38.93	1
43.72	1
55.18	1
33.72	1
63.8	1
47.97	1
42.42	1
23.72	1
41.28	1
41.28	1
48.93	1
34.93	1
47.72	1
46.15	1
60.05	1
48.5	1
48.67	1
30.68	1
47.72	1
48.4	1
66.05	1
77.7	1
55.02	1
38.67	1
41.55	1
42.85	1
43.8	1
41.1	1
56.93	1
50.4	1
59.37	1
44.67	1
58.93	1
50.15	1
53.97	1
54.32	1
61.88	1
52.58	1
47.72	1
40.58	1
50.75	1
53.53	1
54.75	1
44.75	1
41.63	1
59.45	1
61.45	1
53.8	1
44.42	1
32.07	1
53.8	1
50.93	1
40.42	1
56.32	1
57.02		1
57.27		1
53.37		1
56.83		1
36.42		1
45.97		1
53.28		1
46.93		1
53.53		1
45.28		1
50.32		1
63.02		1
38.58		1
44.15		1
39.12		1
49.97		1
47.45		1
52.75		1
43.63		1
46.42		1
48.15		1
40.5		1
39.12		1
61.02		1
56.58		1
51.37		1
47.97		1
17.2		1
57.72		1
48.32		1
59.62		1
58.75		1
47.02		1
50.67		1
46.15		1
44.5		1
43.63		1
39.37		1
60.15		1
58.23		1
48.15		1
43.45		1
49.45		1
48.15		1
38.85		1
35.37		1
63.8		1
38.42		1
52.07		1
51.45		1
38.33		1
40.32		1
49.72		1
47.88		1
50.4		1
45.97		1
34.15		1
33.28		1
37.55		1
37.12		1
47.28		1
55.18		1
43.45		1
40.85		1
49.45		1
48.4		1
41.8		1
58.48		1
42.42		1
45.88		1
41.2		1
47.18		1
49.72		1
45.02		1
54.15		1
51.62		1
38.07		1
43.63		1
48.75		1
8.683		1
40.77		1
47.28		1
31.45		1
51.8		1
51.28		1
56.4		1
57.1		1
34.33		1
37.28		1
42.32		1
20.85		1
48.75		1
41.1		1
46.85		1
49.45		1
39.28		1
49.28			1
51.45			1
59.27			1
41.1			1
55.8			1
47.8			1
42.58			1
51.1			1
44.93			1
47.18			1
41.2			1
21.28			1
48.85			1
40.93			1
47.72			1
45.45			1
53.45			1
47.1			1
44.75			1
33.28			1
55.37			1
53.72			1
58.48			1
52.15			1
55.8			1
56.83			1
32.77			1
40.07			1
46.15			1
48.4			1
50.23			1
48.85			1
58.83			1
56.93			1
49.37			1
34.23			1
38.07			1
53.72			1
52.93			1
30.68			1
28.07			1
49.97			1
54.4			1
44.42			1
38.58			1
47.72			1
40.93			1
46.42			1
47.72			1
43.72			1
49.02			1
43.8			1
45.45			1
45.28			1
43.53			1
56.5			1
43.63			1
52.4			1
36.77			1
46.32			1
38.58			1
48.32			1
44.67			1
46.85			1
43.88			1
38.85			1
58.67			1
49.72			1
45.97			1
45.88			1
43.45			1
40.58			1
46.42			1
45.63			1
25.82			1
43.2			1
50.93			1
31.98			1
47.97			1
33.98			1
68.83			1
51.1			1
49.8			1
58.83			1
29.98			1
48.58			1
41.28			1
51.8			1
47.72			1
43.02			1
55.62			1
37.12			1
48.58			1
56.05			1
41.88			1
53.8			1
