# Supplementary material for: The Drosophila Individual Activity Monitoring and Detection System (DIAMonDS)
Source: eLife. 2020 Nov 10;9:e58630. doi: 10.7554/eLife.58630 (PMC7655107; doi:10.7554/eLife.58630)
Supplement: Figure 5—source data 1. [file elife-58630-fig5-data1.xlsx]

## Sheet: Fig.5B, Fig.5-Sup1A
CF	192	192			TH	192	192
	Male	Female				Male	Female
54	1				54.1283	1
55	1				55.4006	1
62	1				63.0339	1
39	1				38.8617	1
53	1				54.1283	1
49	1				50.0569	1
48	1				47.5128	1
45	1				44.9683	1
55	1				55.1461	1
53	1				52.6017	1
41	1				41.4058	1
55	1				54.8914	1
58	1				58.9625	1
51	1				52.3469	1
46	1				47.2581	1
47	1				47.7672	1
48	1				47.5128	1
61	1				62.525	1
53	1				56.4183	1
64	1				64.0517	1
62	1				62.525	1
51	1				50.8206	1
48	1				47.7672	1
67	1				67.3594	1
58	1				58.4539	1
56	1				56.1639	1
62	1				61.7614	1
62	1				62.525	1
50	1				50.0569	1
47	1				47.0039	1
67	1				67.3594	1
59	1				58.7083	1
48	1				48.5306	1
48	1				48.2761	1
59	1				59.7261	1
57	1				58.1994	1
44	1				44.7139	1
47	1				47.5128	1
63	1				63.0339	1
49	1				49.0394	1
56	1				56.9272	1
50	1				50.8206	1
55	1				56.1639	1
55	1				55.4006	1
44	1				44.4592	1
44	1				43.6961	1
57	1				55.655	1
55	1				56.1639	1
40	1				40.3883	1
40	1				41.1514	1
55	1				55.655	1
48	1				48.2761	1
59	1				59.2169	1
60	1				59.9806	1
56	1				56.6725	1
54	1				55.1461	1
58	1				58.9625	1
50	1				50.8206	1
52	1				52.3469	1
45	1				46.2406	1
43	1				43.9506	1
58	1				58.4539	1
55	1				55.655	1
56	1				56.4183	1
48	1				47.0039	1
31	1				31.4825	1
45	1				44.9683	1
59	1				60.7436	1
59	1				60.235	1
50	1				50.5661	1
45	1				45.7317	1
60	1				60.4892	1
56	1				56.1639	1
52	1				52.8561	1
57	1				57.4361	1
54	1				54.1283	1
59	1				59.2169	1
44	1				45.2228	1
57	1				56.9272	1
49	1				49.2939	1
54	1				54.8914	1
64	1				64.8147	1
63	1				63.0339	1
55	1				56.1639	1
65	1				65.5783	1
45	1				45.4772	1
51	1				51.5839	1
43	1				42.9325	1
57	1				57.4361	1
60	1				60.9983	1
56	1				56.4183	1
62	1				62.2706	1
51	1				51.0747	1
57	1				57.6906	1
36	1				38.8617	1
58	1				58.7083	1
54	1				54.8914	1
47	1				48.2761	1
52	1				52.0928	1
49	1				49.8025	1
50	1				50.3117	1
42	1				42.6781	1
54	1				55.1461	1
57	1				58.1994	1
48	1				48.5306	1
53	1				53.3647	1
56	1				56.6725	1
48	1				48.2761	1
48	1				48.2761	1
48	1				47.5128	1
40	1				41.1514	1
54	1				55.1461	1
56	1				56.4183	1
49	1				48.785	1
54	1				54.3828	1
47	1				47.5128	1
53	1				53.1106	1
55	1				55.4006	1
55	1				55.9094	1
60	1				60.235	1
55	1				55.1461	1
39	1				40.1339	1
67	1				68.3772	1
55	1				55.655	1
45	1				45.7317	1
59	1				59.4714	1
48	1				48.785	1
47	1				47.0039	1
65	1				66.0872	1
49	1				49.0394	1
32	1				27.1564	1
67	1				67.8683	1
49	1				49.2939	1
53	1				52.0928	1
49	1				49.5483	1
51	1				51.5839	1
50	1				50.0569	1
43	1				43.6961	1
57	1				57.945	1
65	1				66.3417	1
55	1				55.655	1
57	1				57.4361	1
52	1				51.8383	1
50	1				50.0569	1
53	1				52.8561	1
46	1				46.7494	1
64	1				64.0517	1
64	1				64.5606	1
52	1				51.8383	1
72	1				72.4483	1
53	1				53.8739	1
58	1				58.7083	1
67	1				67.105	1
56	1				56.4183	1
58	1				58.7083	1
56	1				56.9272	1
65	1				65.0692	1
49	1				50.0569	1
59	1				59.4714	1
45	1				45.7317	1
50	1				50.8206	1
61	1				61.5072	1
62	1				61.7614	1
46	1				46.495	1
57	1				56.9272	1
48	1				49.2939	1
55	1				55.655	1
51	1				51.8383	1
46	1				46.495	1
36	1				36.3172	1
54	1				54.6372	1
51	1				51.8383	1
59	1				60.4892	1
43	1				43.6961	1
47	1				47.5128	1
49	1				49.5483	1
57	1				57.945	1
55	1				55.9094	1
54	1				54.6372	1
39	1				39.3703	1
43	1				43.1872	1
60	1				60.9983	1
67	1				67.6139	1
57	1				56.9272	1
58	1				59.2169	1
47	1				47.7672	1
58	1				58.7083	1
53	1				53.3647	1
54	1				53.8739	1
59	1				59.4714	1
49	1				49.0394	1
58	1				57.945	1
68		1			68.6317		1
64		1			65.0692		1
77		1			77.0283		1
68		1			68.8861		1
55		1			55.655		1
57		1			57.4361		1
60		1			60.4892		1
60		1			60.235		1
75		1			76.0106		1
60		1			60.7436		1
85		1			85.9339		1
61		1			61.7614		1
66		1			66.3417		1
64		1			64.8147		1
61		1			63.0339		1
57		1			56.9272		1
56		1			56.9272		1
75		1			75.7561		1
49		1			49.8025		1
58		1			58.9625		1
75		1			76.0106		1
54		1			55.1461		1
66		1			66.3417		1
56		1			56.1639		1
47		1			47.2581		1
63		1			63.5425		1
77		1			77.2825		1
61		1			62.7794		1
82		1			82.6261		1
61		1			62.0161		1
57		1			57.1817		1
63		1			63.2883		1
48		1			49.0394		1
68		1			68.3772		1
61		1			61.7614		1
61		1			61.7614		1
44		1			44.4592		1
37		1			37.8439		1
55		1			55.4006		1
60		1			61.5072		1
62		1			63.0339		1
49		1			49.5483		1
75		1			76.0106		1
61		1			62.2706		1
60		1			59.9806		1
61		1			60.9983		1
63		1			63.7969		1
69		1			70.6672		1
65		1			66.3417		1
70		1			70.4128		1
46		1			46.2406		1
66		1			66.3417		1
75		1			75.2472		1
78		1			79.5728		1
68		1			68.8861		1
66		1			66.5961		1
66		1			65.3236		1
67		1			67.105		1
65		1			65.5783		1
67		1			67.8683		1
70		1			74.4839		1
57		1			57.4361		1
56		1			56.4183		1
80		1			80.5903		1
70		1			71.1758		1
68		1			68.8861		1
67		1			67.8683		1
62		1			61.7614		1
58		1			58.1994		1
58		1			58.9625		1
65		1			66.3417		1
58		1			58.7083		1
53		1			53.6194		1
86		1			86.9517		1
55		1			55.655		1
71		1			71.4306		1
54		1			54.8914		1
66		1			66.8503		1
62		1			62.2706		1
67		1			67.3594		1
76		1			76.5192		1
55		1			55.1461		1
67		1			67.105		1
54		1			54.6372		1
63		1			64.8147		1
56		1			57.1817		1
78		1			78.8094		1
69		1			70.1581		1
63		1			64.0517		1
58		1			58.9625		1
59		1			59.2169		1
73		1			73.7206		1
57		1			58.1994		1
65		1			65.0692		1
61		1			62.2706		1
61		1			61.2528		1
69		1			68.3772		1
55		1			55.9094		1
51		1			51.3292		1
60		1			60.9983		1
60		1			60.7436		1
56		1			56.6725		1
51		1			51.3292		1
54		1			53.8739		1
46		1			47.0039		1
95		1			95.6028		1
58		1			58.9625		1
47		1			47.5128		1
56		1			57.4361		1
55		1			55.4006		1
68		1			69.3947		1
76		1			76.7739		1
70		1			70.6672		1
47		1			47.2581		1
68		1			67.8683		1
60		1			61.5072		1
70		1			70.1581		1
46		1			46.495		1
63		1			63.7969		1
58		1			58.9625		1
93		1			94.5853		1
64		1			63.7969		1
61		1			62.0161		1
84		1			84.4072		1
48		1			48.0217		1
54		1			54.1283		1
70		1			70.4128		1
75		1			76.0106		1
62		1			62.2706		1
67		1			68.3772		1
54		1			54.3828		1
70		1			70.1581		1
49		1			49.0394		1
63		1			63.5425		1
68		1			68.8861		1
67		1			67.105		1
72		1			74.9928		1
92		1			92.8042		1
64		1			62.7794		1
75		1			76.0106		1
48		1			48.2761		1
79		1			80.5903		1
39		1			39.6247		1
50		1			50.8206		1
71		1			71.1758		1
56		1			56.6725		1
59		1			59.2169		1
72		1			73.4661		1
63		1			64.3061		1
78		1			78.0461		1
61		1			61.7614		1
33		1			32.755		1
83		1			83.8983		1
76		1			76.265		1
65		1			66.0872		1
47		1			46.7494		1
62		1			62.7794		1
48		1			42.6781		1
59		1			60.4892		1
66		1			67.105		1
79		1			79.5728		1
58		1			58.4539		1
57		1			57.4361		1
61		1			61.7614		1
57		1			57.945		1
66		1			66.8503		1
66		1			66.3417		1
73		1			73.7206		1
63		1			64.0517		1
66		1			66.3417		1
62		1			62.0161		1
82		1			83.6436		1
66		1			66.0872		1
62		1			61.7614		1
69		1			69.9039		1
81		1			81.0994		1
57		1			57.945		1
69		1			68.8861		1
55		1			55.1461		1
66		1			66.3417		1
31		1			31.7369		1
75		1			76.0106		1
61		1			61.7614		1
67		1			67.105		1
60		1			60.4892		1
53		1			53.6194		1
53		1			53.3647		1
55		1			56.1639		1
54		1			54.6372		1
59		1			59.4714		1
65		1			65.3236		1
64		1			65.0692		1

## Sheet: Fig.5D, Fig5.-Sup.1C
CF	48	48	48	48	48			TH	48	48	48	48	48
	0%	0.005%	0.01%	0.05%	0.1%				0%	0.005%	0.01%	0.05%	0.1%
162.085	0							162.085	0
162.085	0							162.085	0
136.386	1							136.386	1
162.085	0							162.085	0
162.085	0							162.085	0
162.085	0							162.085	0
162.085	0							162.085	0
162.085	0							162.085	0
162.085	0							162.085	0
162.085	0							162.085	0
162.085	0							162.085	0
19.3408	1							22.1397	1
162.085	0							162.085	0
162.085	0							162.085	0
162.085	0							162.085	0
162.085	0							162.085	0
162.085	0							162.085	0
162.085	0							162.085	0
162.085	0							162.085	0
162.085	0							162.085	0
162.085	0							162.085	0
145.037	1							145.546	1
84.2253	1							84.7339	1
162.085	0							162.085	0
162.085	0							161.831	0
162.085	0							162.085	0
162.085	0							162.085	0
33.3361	0							162.085	0
162.085	0							162.085	0
22.6489	1							22.1397	1
162.085	0							162.085	0
162.085	0							162.085	0
113.995	1							113.486	1
162.085	0							162.085	0
162.085	0							162.085	0
162.085	0							162.085	0
162.085	0							162.085	0
162.085	0							162.085	0
162.085	0							162.085	0
162.085	0							162.085	0
162.085	0							162.085	0
162.085	0							162.085	0
162.085	0							162.085	0
162.085	0							162.085	0
162.085	0							162.085	0
162.085	0							162.085	0
162.085	0							162.085	0
162.085	0							162.085	0
103.563		1						103.817		1
78.8817		1						79.6453		1
66.6683		1						59.035		1
53.1831		1						53.1831		1
133.842		1						135.114		1
51.4019		1						52.4197		1
75.5739		1						75.3194		1
66.9231		1						67.1775		1
57.2539		1						57.5086		1
48.8575		1						49.8753		1
67.9406		1						64.1239		1
62.5972		1						62.5972		1
62.0883		1						59.035		1
50.1297		1						50.3839		1
121.374		1						122.138		1
162.085		0						162.085		0
97.4561		1						98.2197		1
55.2183		1						55.9819		1
74.5564		1						75.3194		1
55.2183		1						55.4728		1
60.0528		1						60.0528		1
57.2539		1						58.0175		1
69.7217		1						70.485		1
44.2772		1						44.5317		1
65.3961		1						66.1597		1
41.9872		1						42.7508		1
67.4319		1						68.195		1
80.4083		1						80.6628		1
51.4019		1						51.9108		1
51.4019		1						51.6561		1
143.002		1						144.02		1
85.4972		1						85.7517		1
105.089		1						105.598		1
140.967		1						141.475		1
62.0883		1						62.3428		1
94.9117		1						95.4206		1
98.9828		1						99.4917		1
62.8517		1						62.5972		1
79.6453		1						80.1539		1
65.3961		1						65.6506		1
57.2539		1						58.0175		1
95.675		1						95.9297		1
41.4786		1						41.7328		1
84.4794		1						83.2072		1
66.1597		1						66.4142		1
40.2061		1						40.715		1
144.783		1						145.292		1
162.085		0						162.085		0
45.5494			1					46.0583			1
62.0883			1					62.3428			1
36.8983			1					37.4072			1
43.005			1					42.2419			1
52.165			1					51.4019			1
97.7106			1					97.7106			1
34.0994			1					34.6083			1
23.1575			1					23.9211			1
57.5086			1					59.2894			1
24.9386			1					25.1931			1
41.9872			1					42.2419			1
36.3897			1					36.6439			1
35.1175			1					34.0994			1
47.0764			1					47.8394			1
25.7019			1					24.6844			1
33.845			1					37.6619			1
61.8342			1					62.3428			1
68.4497			1					68.7039			1
47.3308			1					47.0764			1
81.4261			1					81.6806			1
59.2894			1					59.2894			1
52.4197			1					52.4197			1
50.1297			1					50.8928			1
62.0883			1					62.0883			1
46.5672			1					45.8042			1
41.7328			1					41.7328			1
25.1931			1					24.4297			1
44.5317			1					43.5142			1
35.8806			1					35.8806			1
46.5672			1					46.8219			1
34.3539			1					34.3539			1
60.8161			1					61.0706			1
55.4728			1					55.7275			1
26.2111			1					26.2111			1
37.9161			1					38.6794			1
56.4906			1					49.1119			1
37.6619			1					38.9342			1
26.72			1					27.4833			1
57.7631			1					58.7806			1
43.7686			1					44.5317			1
39.1883			1					39.6972			1
37.6619			1					38.6794			1
62.0883			1					61.8342			1
33.0817			1					33.3361			1
36.3897			1					36.6439			1
39.4431			1					40.4606			1
91.095			1					83.9708			1
87.0239			1					87.0239			1
27.9919				1				29.0103				1
24.6844				1				24.9386				1
32.5725				1				32.8272				1
31.0458				1				31.3006				1
33.845				1				34.0994				1
26.72				1				26.72				1
31.3006				1				32.8272				1
43.2597				1				43.2597				1
26.4656				1				26.2111				1
24.4297				1				23.9211				1
22.1397				1				22.3944				1
19.5953				1				19.3408				1
30.0281				1				30.2825				1
19.3408				1				20.1039				1
26.2111				1				26.9744				1
30.2825				1				30.5367				1
11.1981				1				13.2342				1
19.0864				1				19.0864				1
33.845				1				34.3539				1
31.3006				1				30.2825				1
22.9033				1				22.3944				1
20.6131				1				20.6131				1
26.72				1				27.4833				1
26.2111				1				26.4656				1
21.8856				1				21.8856				1
31.555				1				32.0636				1
27.9919				1				26.4656				1
29.7736				1				30.5367				1
30.7914				1				31.0458				1
25.1931				1				24.6844				1
36.8983				1				37.4072				1
33.845				1				34.0994				1
11.7072				1				12.2161				1
28.7556				1				29.0103				1
38.425				1				38.425				1
34.0994				1				34.8628				1
25.7019				1				26.72				1
28.7556				1				29.2647				1
29.0103				1				29.0103				1
30.0281				1				29.7736				1
26.72				1				28.7556				1
31.3006				1				30.5367				1
25.9564				1				25.1931				1
27.7375				1				27.9919				1
22.9033				1				24.4297				1
31.555				1				31.8094				1
35.3717				1				35.3717				1
35.8806				1				36.6439				1
20.6131					1			20.8675					1
21.3764					1			21.8856					1
15.7783					1			15.5239					1
18.8319					1			19.3408					1
16.7961					1			18.5775					1
20.6131					1			20.6131					1
19.5953					1			19.0864					1
19.0864					1			18.5775					1
18.5775					1			18.3228					1
16.7961					1			17.0506					1
20.1039					1			19.8494					1
19.8494					1			19.5953					1
18.0686					1			18.0686					1
21.3764					1			21.6308					1
24.4297					1			24.4297					1
24.6844					1			24.4297					1
17.3053					1			17.8142					1
23.6667					1			23.1575					1
31.0458					1			32.0636					1
21.6308					1			21.3764					1
17.3053					1			17.5597					1
22.3944					1			22.6489					1
14.2517					1			14.7608					1
19.5953					1			19.8494					1
16.7961					1			16.5417					1
17.8142					1			17.3053					1
9.67056					1			10.4344					1
17.5597					1			16.5417					1
18.3228					1			19.0864					1
19.8494					1			19.8494					1
17.3053					1			17.8142					1
17.5597					1			17.5597					1
25.4478					1			26.4656					1
24.1756					1			24.6844					1
25.4478					1			25.7019					1
16.2872					1			16.0331					1
21.3764					1			22.1397					1
22.6489					1			22.9033					1
16.7961					1			16.7961					1
23.1575					1			23.4119					1
15.5239					1			16.0331					1
19.5953					1			14.5061					1
24.4297					1			24.6844					1
20.3586					1			20.1039					1
26.72					1			26.72					1
27.7375					1			27.9919					1
27.9919					1			27.2289					1
28.7556					1			28.2464					1

## Sheet: Fig.5F
paraquate		0mM				5mM				10mM				20mM
	N	32	32		N	32	32		N	32	32		N	32	32
		mth1	w1118			mth1	w1118			mth1	w1118			mth1	w1118
	229.8		0		113.75		1		51		1		43.25		1
	230		0		46.5		1		44		1		37.75		1
	230.3		0		70.25		1		64.3		1		29.5		1
	230.3		0		171.25		1		45.5		1		38		1
	228.8		0		102.25		1		22.3		1		42		1
	230.3		0		67.25		1		82.5		1		38.75		1
	230.3		0		90.5		1		52.5		1		43.75		1
	230.3		0		153		1		57.8		1		49.75		1
	230.3		0		67		1		34		1		56		1
	230.3		0		67		1		37.5		1		40		1
	230.3		0		73.5		1		51.5		1		33.25		1
	230.3		0		35		1		72		1		42		1
	230		0		82.5		1		51.8		1		42.25		1
	228.5		0		86.5		1		74.8		1		84.25		1
	228.8		0		110.75		1		40		1		49.25		1
	230.3		0		60.25		1		45.3		1		29.5		1
	229.8		0		59.5		1		41.5		1		48		1
	230		0		79		1		44.8		1		46		1
	229.3		0		58.25		1		40.3		1		38		1
	230.3		0		65		1		56		1		37		1
	230		0		104		1		35.5		1		33.5		1
	230.3		0		168		1		45.8		1		31.5		1
	230.3		0		67.5		1		30.8		1		37.25		1
	225.5		1		74.75		1		74.8		1		49		1
	230.3		0		76.5		1		61.5		1		24.5		1
	228.8		0		24		1		78.5		1		25.75		1
	229.3		0		148		1		27		1		31.75		1
	230		0		154.5		1		45		1		51.75		1
	224.8		0		68		1		54.3		1		41.75		1
	228.5		0		61.5		1		39.8		1		36.25		1
	229.8		0		135		1		35.5		1		53.75		1
	230.3		0		60.5		1		61.5		1		33.75		1
	230.3	0			193.25	1			83.3	1			28.75	1
	211	1			77.5	1			100	1			16.75	1
	230.3	0			156	1			54.8	1			22.25	1
	194.8	1			187.25	1			68.3	1			22	1
	230.3	0			134.5	1			92.5	1			55.75	1
	177.5	1			211.75	1			58	1			40.75	1
	230.3	0			111.25	1			86.5	1			38.25	1
	230.3	0			49	1			61.8	1			23.25	1
	230.3	0			54	1			42.5	1			31.75	1
	221	1			71.25	1			62	1			35.5	1
	228.3	1			90.75	1			61.5	1			55.25	1
	230.3	0			68	1			74.8	1			33	1
	203.5	1			144.25	1			103.3	1			36.75	1
	211.8	1			153.75	1			81.8	1			38.5	1
	202.3	1			75.75	1			62.3	1			20.25	1
	183.3	1			68.75	1			81.5	1			24.25	1
	230.3	0			156.25	1			110.8	1			47.75	1
	212.3	1			77.5	1			27.8	1			29.75	1
	229.8	0			101.75	1			48.8	1			42.75	1
	139.5	1			163.5	1			48.8	1			39	1
	204.5	1			73.5	1			78.5	1			54.75	1
	230.3	0			109.5	1			42.8	1			21	1
	229.8	0			76.25	1			46	1			35	1
	230	0			79.75	1			50	1			16	1
	183.3	1			99.5	1			66.3	1			22	1
	224.5	1			195.75	1			91	1			31.75	1
	191.5	1			174.75	1			56.5	1			35	1
	187.8	1			229	1			133	1			22	1
	216.3	0			71.25	1			92	1			37.75	1
	229	0			163.25	1			58	1			37.75	1
	223	0			110.5	1			47.3	1			36.25	1
	210.5	1			110	1			74.3	1			31.5	1
