# Supplementary material for: The Drosophila Individual Activity Monitoring and Detection System (DIAMonDS)
Source: eLife. 2020 Nov 10;9:e58630. doi: 10.7554/eLife.58630 (PMC7655107; doi:10.7554/eLife.58630)
Supplement: Figure 6—figure supplement 1—source data 1. [file elife-58630-fig6-figsupp1-data1.xlsx]

## Sheet: Fig.6-Sup.1
w1118
	1st week						2nd weeks						3rd weeks						4th weeks
96-well	100	96	100	96	100	100	100	96	91	83	100	96	100	96	91	83	95	96	95	96	91	78	86	91
48-well	100	100	96	96	100	100	100	100	92	96	100	100	100	100	88	91	100	100	100	100	88	87	100	96
24-well	100	100	100	100	100	100	100	100	100	100	100	100	100	95	95	90	100	100	100	95	95	80	100	100
Oregon-R
	1st week						2nd weeks						3rd weeks						4th weeks
96-well	96	90	83	91	88	96	92	90	83	70	83	91	75	80	71	65	70	78	71	70	63	61	70	74
48-well	79	71	70	71	70	75	63	63	57	58	61	63	46	42	35	38	45	33	42	42	26	29	41	25
24-well	85	85	95	90	95	80	60	74	55	63	53	55	40	30	35	28	37	15	10	5	15	11	5.3	5
96-well (transfer every 2-3 days)	91.6667	100	91.6667	100	83.3333	91.6667	83.3333	100	91.6667	100	83.3333	83.3333	83.3333	91.6667	91.6667	100	83.3333	83.3333	75	91.6667	83.3333	72.7273	83.3333	75
Canton-S
	1st week						2nd weeks						3rd weeks						4th weeks
96-well	46	55	42	64	61	61	25	50	42	55	39	52	13	18	8	14	22	30	4	14	0	0	4	9
48-well	88	88	92	96	96	88	48	63	63	48	42	63	22	25	8	0	21	8	0	4	0	0	4	0
24-well	56	56	68	65	65	79	6	6	11	25	20	21	0	0	0	0	0	0	0	0	0	0	0	0
96-well (transfer every 2-3 days)	100	100	100	100	100	90.9091	91.6667	100	91.6667	90.9091	90.9091	90.9091	83.3333	91.6667	75	63.6364	81.8182	72.7273	50	41.6667	33.3333	18.1818	54.5455	45.4545
