# Supplementary material for: The Drosophila Individual Activity Monitoring and Detection System (DIAMonDS)
Source: eLife. 2020 Nov 10;9:e58630. doi: 10.7554/eLife.58630 (PMC7655107; doi:10.7554/eLife.58630)
Supplement: Figure 6—source data 1. [file elife-58630-fig6-data1.xlsx]

## Sheet: Fig.6
Fig.6A				Fig.6B					Fig.6C,E,F				Fig.6G,H,I
pupariation and eclosion				lifespan					Female				Male
n	75	59			59	75			59	59	59		75	75	75
pupariation	eclosion				Female	Male			Adult lifespan	Larval duration	Pupal duration		Adult lifespan	Larval duration	Pupal duration
	female	Male		51.8624	1				51.8624	4.05204	3.78913		6.0048	3.94406	4.12318
3.94406	8.06725			60.1145	1				60.1145	3.94828	3.80176		18.5963	3.86053	4.19248
3.86053	8.05301			45.9471	1				45.9471	3.88753	3.80471		24.2048	3.53017	4.20897
3.53017	7.73914			52.3684	1				52.3684	3.9787	3.80896		29.2906	4.08414	4.27317
4.08414	8.35731			60.6071	1				60.6071	3.97954	3.82067		30.006	3.97109	4.19845
3.97109	8.16954			59.1604	1				59.1604	4.23095	3.8363		34.6012	4.04108	4.18875
4.04108	8.22983			67.4002	1				67.4002	4.11788	3.85719		36.905	4.47832	4.24841
4.47832	8.72674			58.922	1				58.922	4.14491	3.8603		37.4434	4.1356	4.24436
4.1356	8.37997			66.4995	1				66.4995	3.79391	3.86909		40.2615	3.66837	4.27325
3.66837	7.94162			54.1663	1				54.1663	4.39645	3.87105		45.6204	3.56895	4.71032
3.56895	8.27927			68.408	1				68.408	3.90947	3.87233		46.6596	3.96601	4.20353
3.96601	8.16954			51.593	1				51.593	3.81245	3.87811		46.9023	3.52766	4.16039
3.52766	7.68806			79.3628	1				79.3628	3.89765	3.87828		47.9529	3.94406	3.96657
3.94406	7.91064			47.9157	1				47.9157	4.21998	3.88332		49.6713	4.65985	4.30063
4.65985	8.96047			47.42	1				47.42	4.01499	3.89315		50.7264	3.99304	4.24182
3.99304	8.23486			53.6087	1				53.6087	4.08244	3.89514		50.8703	4.1888	4.15931
4.1888	8.3481			37.7927	1				37.7927	4.04781	3.89968		51.0495	4.20985	4.09297
4.20985	8.30282			44.5676	1				44.5676	4.00906	3.90576		51.2877	3.86222	4.16983
3.86222	8.03205			38.2397	1				38.2397	3.86306	3.90869		51.4008	4.12801	4.15295
4.12801	8.28096			65.1395	1				65.1395	4.14323	3.90978		51.914	4.01413	4.36918
4.01413	8.38331			53.0541	1				53.0541	3.912	3.91411		53.2209	3.86983	4.10441
3.86983	7.97424			65.8531	1				65.8531	3.85547	3.91461		53.2613	3.98628	4.20838
3.98628	8.19466			61.0939	1				61.0939	4.27146	3.91484		54.0256	4.10437	4.13716
4.10438	8.24154			63.3585	1				63.3585	4.12801	3.92167		54.5347	3.72148	4.10882
3.72148	7.8303			48.5668	1				48.5668	3.63803	3.92633		54.7455	3.63043	4.15556
3.63043	7.78598			53.9327	1				53.9327	3.86983	3.9287		54.9235	3.74506	4.29036
3.74506	8.03542			33.8186	1				33.8186	4.02341	3.93744		56.3506	4.30609	4.219
4.30609	8.52509			65.4004	1				65.4004	4.16178	3.94152		56.4876	4.21661	4.09543
4.21661	8.31204			57.6633	1				57.6633	4.16685	3.95742		56.8514	4.24531	4.09017
4.24531	8.33549			68.1634	1				68.1634	3.65571	3.95799		57.1325	3.89513	4.22075
3.89513	8.11588			46.5245	1				46.5245	4.10185	3.97126		58.5743	4.0192	4.16375
4.0192	8.18295			52.2806	1				52.2806	3.81245	3.98692		58.6492	3.88079	4.3792
3.88079	8.25999			45.7225	1				45.7225	4.19552	3.99245		58.6597	3.5681	4.3015
3.5681	7.86961			54.4912	1				54.4912	4.17192	4.00601		58.8295	4.10185	4.17321
4.10185	8.27506			73.7229	1				73.7229	4.36521	4.00635		58.8953	4.1255	4.19241
4.1255	8.31791			59.4376	1				59.4376	4.24446	4.00883		58.9846	3.69453	4.08894
3.69453	7.78346			67.4583	1				67.4583	3.98123	4.01898		59.4995	3.73328	4.0853
3.73328	7.81858			50.7316	1				50.7316	3.97363	4.02073		60.9623	4.03352	4.10252
4.03352	8.13604			59.9433	1				59.9433	3.55887	4.02222		61.2872	3.96601	4.18262
3.96601	8.14862			60.9085	1				60.9085	3.99558	4.03142		61.3384	4.03772	4.36734
4.03772	8.40506			43.8778	1				43.8778	4.2816	4.04468		61.8993	3.67344	4.22132
3.67344	7.89476			64.2371	1				64.2371	3.58499	4.05296		62.4065	4.1297	4.13362
4.1297	8.26332			61.3447	1				61.3447	4.22589	4.06428		62.5187	3.7038	4.06378
3.7038	7.76758			74.5841	1				74.5841	3.92803	4.06633		62.7236	3.99558	4.2619
3.99558	8.25748			33.836	1				33.836	4.21998	4.06685		63.3162	3.95419	4.16672
3.95419	8.12091			48.0583	1				48.0583	3.96516	4.10042		63.4621	4.21153	4.28836
4.21153	8.49988			46.2016	1				46.2016	4.37028	4.11618		63.5071	3.80402	4.0681
3.80402	7.87212			67.0081	1				67.0081	4.50198	4.12223		63.9623	4.17023	4.32881
4.17023	8.49904			50.9598	1				50.9598	4.43021	4.14699		64.1878	3.96009	3.91537
3.96009	7.87546			52.3394	1				52.3394	3.93394	4.15426		65.0804	4.17023	4.19881
4.17023	8.36904			22.3334	1				22.3334	4.01667	4.17046		65.3433	3.86983	4.31229
3.86983	8.18212			57.7471	1				57.7471	4.51551	4.17257		65.3696	4.47243	4.28791
4.47243	8.76034			66.6009	1				66.6009	3.57317	4.1802		65.9279	4.01075	4.23833
4.01075	8.24909			64.0935	1				64.0935	4.16516	4.19551		67.2024	4.02846	4.23486
4.02846	8.26332			54.1869	1				54.1869	4.52564	4.22463		67.2425	4.4665	4.31064
4.4665	8.77714			54.3804	1				54.3804	4.37872	4.23961		67.3867	4.07315	4.26655
4.07315	8.3397			51.1783	1				51.1783	3.95334	4.32929		67.5879	3.86053	4.10785
3.86053	7.96838			66.7579	1				66.7579	3.60181	4.49059		68.6958	4.07907	4.18258
4.07907	8.26166			62.2853	1				62.2853	4.19383	4.89285		68.8491	3.52431	4.11698
3.52431	7.64128			6.0048		1							68.9989	3.55802	4.11083
3.55802	7.66885			18.5963		1							69.2253	3.77874	4.02981
3.77874	7.80855			24.2048		1							69.8419	3.79139	4.08323
3.79139	7.87462			29.2906		1							70.0404	3.7198	4.32485
3.7198	8.04465			30.006		1							70.6146	3.62455	4.19987
3.62455	7.82442			34.6012		1							70.8372	4.2284	4.26559
4.2284	8.49399			36.905		1							71.225	3.8791	4.24517
3.8791	8.12427			37.4434		1							72.1994	4.03016	4.22145
4.03016	8.25161			40.2615		1							72.7428	3.90779	4.10749
3.90779	8.01528			45.6204		1							73.5523	3.81836	4.03034
3.81836	7.84869			46.6596		1							75.0798	3.86645	4.14883
3.86645	8.01528			46.9023		1							76.9274	4.14153	4.17721
4.14153	8.31874			47.9529		1							77.7772	4.04191	4.28102
4.04191	8.32293			49.6713		1							78.1609	3.83354	4.1491
3.83354	7.98264			50.7264		1							78.8533	4.02595	4.13272
4.02595	8.15867			50.8703		1							80.5498	4.19638	4.19863
4.19638	8.39501			51.0495		1
4.05204		7.84117		51.2877		1
3.94828		7.75003		51.4008		1
3.88753		7.69225		51.914		1
3.9787		7.78766		53.2209		1
3.97954		7.80021		53.2613		1
4.23095		8.06725		54.0256		1
4.11788		7.97507		54.5347		1
4.14491		8.00521		54.7455		1
3.79391		7.663		54.9235		1
4.39645		8.2675		56.3506		1
3.90947		7.78179		56.4876		1
3.81245		7.69057		56.8514		1
3.89765		7.77593		57.1325		1
4.21998		8.1033		58.5743		1
4.01499		7.90814		58.6492		1
4.08244		7.97758		58.6597		1
4.04781		7.94749		58.8295		1
4.00906		7.91483		58.8953		1
3.86306		7.77175		58.9846		1
4.14323		8.05301		59.4995		1
3.912		7.82611		60.9623		1
3.85547		7.77008		61.2872		1
4.27146		8.1863		61.3384		1
4.12801		8.04968		61.8993		1
3.63803		7.56436		62.4065		1
3.86983		7.79853		62.5187		1
4.02341		7.96086		62.7236		1
4.16178		8.1033		63.3162		1
4.16685		8.12427		63.4621		1
3.65571		7.61369		63.5071		1
4.10185		8.07311		63.9623		1
3.81245		7.79938		64.1878		1
4.19552		8.18797		65.0804		1
4.17192		8.17793		65.3433		1
4.36521		8.37156		65.3696		1
4.24446		8.25329		65.9279		1
3.98123		8.00021		67.2024		1
3.97363		7.99436		67.2425		1
3.55887		7.58109		67.3867		1
3.99558		8.027		67.5879		1
4.2816		8.32627		68.6958		1
3.58499		7.63795		68.8491		1
4.22589		8.29017		68.9989		1
3.92803		7.99436		69.2253		1
4.21998		8.28683		69.8419		1
3.96516		8.06558		70.0404		1
4.37028		8.48646		70.6146		1
4.50198		8.62421		70.8372		1
4.43021		8.5772		71.225		1
3.93394		8.08819		72.1994		1
4.01667		8.18713		72.7428		1
4.51551		8.68808		73.5523		1
3.57317		7.75337		75.0798		1
4.16516		8.36067		76.9274		1
4.52564		8.75027		77.7772		1
4.37872		8.61832		78.1609		1
3.95334		8.28264		78.8533		1
3.60181		8.0924		80.5498		1
4.19383		9.08668
