# Supplementary material for: Mammal Teeth: Origin, Evolution, and Diversity
Source: eLife journal article supplement (doi:10.7554/elife.58630), 2010-10-01
Supplement: supp1 [file DIAMonDS(Death_event, 384well)-template.ver.1.1.2.xlsx]

## Sheet: From deathTime_auto
Copy and paste your data from deathTime_auto.																													Copy and paste your data from deathTime_auto.
			1	2	3	4	5	6	7	8	9	10	11	12	13	14	15	16	17	18	19	20	21	22	23	24					1	2	3	4	5	6	7	8	9	10	11	12	13	14	15	16	17	18	19
1	Plate 1	A																										1	Plate 1	A
2		B																										2		B
3		C																										3		C
4		D																										4		D
5		E																										5		E
6		F																										6		F
7		G																										7		G
8		H																										8		H
9		I																										9		I
10		J																										10		J
11		K																										11		K
12		L																										12		L
13		M																										13		M
14		N																										14		N
15		O																										15		O
16		P																										16		P
17	Plate 2	A																										17	Plate 2	A
18		B																										18		B
19		C																										19		C
20		D																										20		D
21		E																										21		E
22		F																										22		F
23		G																										23		G
24		H																										24		H
25		I																										25		I
26		J																										26		J
27		K																										27		K
28		L																										28		L
29		M																										29		M
30		N																										30		N
31		O																										31		O
32		P																										32		P
33	Plate 3	A																										33	Plate 3	A
34		B																										34		B
35		C																										35		C
36		D																										36		D
37		E																										37		E
38		F																										38		F
39		G																										39		G
40		H																										40		H
41		I																										41		I
42		J																										42		J
43		K																										43		K
44		L																										44		L
45		M																										45		M
46		N																										46		N
47		O																										47		O
48		P																										48		P
Copy and paste your data from Blacklist
			1	2	3	4	5	6	7	8	9	10	11	12	13	14	15	16	17	18	19	20	21	22	23	24
1	Plate 1	A
2		B
3		C
4		D
5		E
6		F
7		G
8		H
9		I
10		J
11		K
12		L
13		M
14		N
15		O
16		P
17	Plate 2	A
18		B
19		C
20		D
21		E
22		F
23		G
24		H
25		I
26		J
27		K
28		L
29		M
30		N
31		O
32		P
33	Plate 3	A
34		B
35		C
36		D
37		E
38		F
39		G
40		H
41		I
42		J
43		K
44		L
45		M
46		N
47		O
48		P
[truncated: 5 more columns]

## Sheet: Input Date of cleation
				”=(C4-C$4)*24*60”	”=(C4-C$4)*24”	”=(C4-C$4)”
	00:00:00
Serial Number	Date of Creation		Serial No.	Elapsed time			Remarks
	YYYY/MM/DD HH:MM:SS			（Minuts)	（Hours)	（Days)
Starting time→
			1	0	0	0
			2	0	0	0
			3	0	0	0
			4	0	0	0
			5	0	0	0
			6	0	0	0
			7	0	0	0
			8	0	0	0
			9	0	0	0
			10	0	0	0
			11	0	0	0
			12	0	0	0
			13	0	0	0
			14	0	0	0
			15	0	0	0
			16	0	0	0
			17	0	0	0
			18	0	0	0
			19	0	0	0
			20	0	0	0
			21	0	0	0
			22	0	0	0
			23	0	0	0
			24	0	0	0
			25	0	0	0
			26	0	0	0
			27	0	0	0
			28	0	0	0
			29	0	0	0
			30	0	0	0
			31	0	0	0
			32	0	0	0
			33	0	0	0
			34	0	0	0
			35	0	0	0
			36	0	0	0
			37	0	0	0
			38	0	0	0
			39	0	0	0
			40	0	0	0
			41	0	0	0
			42	0	0	0
			43	0	0	0
			44	0	0	0
			45	0	0	0
			46	0	0	0
			47	0	0	0
			48	0	0	0
			49	0	0	0
			50	0	0	0
			51	0	0	0
			52	0	0	0
			53	0	0	0
			54	0	0	0
			55	0	0	0
			56	0	0	0
			57	0	0	0
			58	0	0	0
			59	0	0	0
			60	0	0	0
			61	0	0	0
			62	0	0	0
			63	0	0	0
			64	0	0	0
			65	0	0	0
			66	0	0	0
			67	0	0	0
			68	0	0	0
			69	0	0	0
			70	0	0	0
			71	0	0	0
			72	0	0	0
			73	0	0	0
			74	0	0	0
			75	0	0	0
			76	0	0	0
			77	0	0	0
			78	0	0	0
			79	0	0	0
			80	0	0	0
			81	0	0	0
			82	0	0	0
			83	0	0	0
			84	0	0	0
			85	0	0	0
			86	0	0	0
			87	0	0	0
			88	0	0	0
			89	0	0	0
			90	0	0	0
			91	0	0	0
			92	0	0	0
			93	0	0	0
			94	0	0	0
			95	0	0	0
			96	0	0	0
			97	0	0	0
			98	0	0	0
			99	0	0	0
			100	0	0	0
			101	0	0	0
			102	0	0	0
			103	0	0	0
			104	0	0	0
			105	0	0	0
			106	0	0	0
			107	0	0	0
			108	0	0	0
			109	0	0	0
			110	0	0	0
			111	0	0	0
			112	0	0	0
			113	0	0	0
			114	0	0	0
			115	0	0	0
			116	0	0	0
			117	0	0	0
			118	0	0	0
			119	0	0	0
			120	0	0	0
			121	0	0	0
			122	0	0	0
			123	0	0	0
			124	0	0	0
			125	0	0	0
			126	0	0	0
			127	0	0	0
			128	0	0	0
			129	0	0	0
			130	0	0	0
			131	0	0	0
			132	0	0	0
			133	0	0	0
			134	0	0	0
			135	0	0	0
			136	0	0	0
			137	0	0	0
			138	0	0	0
			139	0	0	0
			140	0	0	0
			141	0	0	0
			142	0	0	0
			143	0	0	0
			144	0	0	0
			145	0	0	0
			146	0	0	0
			147	0	0	0
			148	0	0	0
			149	0	0	0
			150	0	0	0
			151	0	0	0
			152	0	0	0
			153	0	0	0
			154	0	0	0
			155	0	0	0
			156	0	0	0
			157	0	0	0
			158	0	0	0
			159	0	0	0
			160	0	0	0
			161	0	0	0
			162	0	0	0
			163	0	0	0
			164	0	0	0
			165	0	0	0
			166	0	0	0
			167	0	0	0
			168	0	0	0
			169	0	0	0
			170	0	0	0
			171	0	0	0
			172	0	0	0
			173	0	0	0
			174	0	0	0
			175	0	0	0
			176	0	0	0
			177	0	0	0
			178	0	0	0
			179	0	0	0
			180	0	0	0
			181	0	0	0
			182	0	0	0
			183	0	0	0
			184	0	0	0
			185	0	0	0
			186	0	0	0
			187	0	0	0
			188	0	0	0
			189	0	0	0
			190	0	0	0
			191	0	0	0
			192	0	0	0
			193	0	0	0
			194	0	0	0
			195	0	0	0
			196	0	0	0
			197	0	0	0
			198	0	0	0
			199	0	0	0
			200	0	0	0
			201	0	0	0
			202	0	0	0
			203	0	0	0
			204	0	0	0
			205	0	0	0
			206	0	0	0
			207	0	0	0
			208	0	0	0
			209	0	0	0
			210	0	0	0
			211	0	0	0
			212	0	0	0
			213	0	0	0
			214	0	0	0
			215	0	0	0
			216	0	0	0
			217	0	0	0
			218	0	0	0
			219	0	0	0
			220	0	0	0
			221	0	0	0
			222	0	0	0
			223	0	0	0
			224	0	0	0
			225	0	0	0
			226	0	0	0
			227	0	0	0
			228	0	0	0
			229	0	0	0
			230	0	0	0
			231	0	0	0
			232	0	0	0
			233	0	0	0
			234	0	0	0
			235	0	0	0
			236	0	0	0
			237	0	0	0
			238	0	0	0
			239	0	0	0
			240	0	0	0
			241	0	0	0
			242	0	0	0
			243	0	0	0
			244	0	0	0
			245	0	0	0
			246	0	0	0
			247	0	0	0
			248	0	0	0
			249	0	0	0
			250	0	0	0
			251	0	0	0
			252	0	0	0
			253	0	0	0
			254	0	0	0
			255	0	0	0
			256	0	0	0
			257	0	0	0
			258	0	0	0
			259	0	0	0
			260	0	0	0
			261	0	0	0
			262	0	0	0
			263	0	0	0
			264	0	0	0
			265	0	0	0
			266	0	0	0
			267	0	0	0
			268	0	0	0
			269	0	0	0
			270	0	0	0
			271	0	0	0
			272	0	0	0
			273	0	0	0
			274	0	0	0
			275	0	0	0
			276	0	0	0
			277	0	0	0
			278	0	0	0
			279	0	0	0
			280	0	0	0
			281	0	0	0
			282	0	0	0
			283	0	0	0
			284	0	0	0
			285	0	0	0
			286	0	0	0
			287	0	0	0
			288	0	0	0
			289	0	0	0
			290	0	0	0
			291	0	0	0
			292	0	0	0
			293	0	0	0
			294	0	0	0
			295	0	0	0
			296	0	0	0
			297	0	0	0
			298	0	0	0
			299	0	0	0
			300	0	0	0
			301	0	0	0
			302	0	0	0
			303	0	0	0
			304	0	0	0
			305	0	0	0
			306	0	0	0
			307	0	0	0
			308	0	0	0
			309	0	0	0
			310	0	0	0
			311	0	0	0
			312	0	0	0
			313	0	0	0
			314	0	0	0
			315	0	0	0
			316	0	0	0
			317	0	0	0
			318	0	0	0
			319	0	0	0
			320	0	0	0
			321	0	0	0
			322	0	0	0
			323	0	0	0
			324	0	0	0
			325	0	0	0
			326	0	0	0
			327	0	0	0
			328	0	0	0
			329	0	0	0
			330	0	0	0
			331	0	0	0
			332	0	0	0
			333	0	0	0
			334	0	0	0
			335	0	0	0
			336	0	0	0
			337	0	0	0
			338	0	0	0
			339	0	0	0
			340	0	0	0
			341	0	0	0
			342	0	0	0
			343	0	0	0
			344	0	0	0
			345	0	0	0
			346	0	0	0
			347	0	0	0
			348	0	0	0
			349	0	0	0
			350	0	0	0
			351	0	0	0
			352	0	0	0
			353	0	0	0
			354	0	0	0
			355	0	0	0
			356	0	0	0
			357	0	0	0
			358	0	0	0
			359	0	0	0
			360	0	0	0
			361	0	0	0
			362	0	0	0
			363	0	0	0
			364	0	0	0
			365	0	0	0
			366	0	0	0
			367	0	0	0
			368	0	0	0
			369	0	0	0
			370	0	0	0
			371	0	0	0
			372	0	0	0
			373	0	0	0
			374	0	0	0
			375	0	0	0
			376	0	0	0
			377	0	0	0
			378	0	0	0
			379	0	0	0
			380	0	0	0
			381	0	0	0
			382	0	0	0
			383	0	0	0
			384	0	0	0
			385	0	0	0
			386	0	0	0
			387	0	0	0
			388	0	0	0
			389	0	0	0
			390	0	0	0
			391	0	0	0
			392	0	0	0
			393	0	0	0
			394	0	0	0
			395	0	0	0
			396	0	0	0
			397	0	0	0
			398	0	0	0
			399	0	0	0
			400	0	0	0
			401	0	0	0
			402	0	0	0
			403	0	0	0
			404	0	0	0
			405	0	0	0
			406	0	0	0
			407	0	0	0
			408	0	0	0
			409	0	0	0
			410	0	0	0
			411	0	0	0
			412	0	0	0
			413	0	0	0
			414	0	0	0
			415	0	0	0
			416	0	0	0
			417	0	0	0
			418	0	0	0
			419	0	0	0
			420	0	0	0
			421	0	0	0
			422	0	0	0
			423	0	0	0
			424	0	0	0
			425	0	0	0
			426	0	0	0
			427	0	0	0
			428	0	0	0
			429	0	0	0
			430	0	0	0
			431	0	0	0
			432	0	0	0
			433	0	0	0
			434	0	0	0
			435	0	0	0
			436	0	0	0
			437	0	0	0
			438	0	0	0
			439	0	0	0
			440	0	0	0
			441	0	0	0
			442	0	0	0
			443	0	0	0
			444	0	0	0
			445	0	0	0
			446	0	0	0
			447	0	0	0
			448	0	0	0
			449	0	0	0
			450	0	0	0
			451	0	0	0
			452	0	0	0
			453	0	0	0
			454	0	0	0
			455	0	0	0
			456	0	0	0
			457	0	0	0
			458	0	0	0
			459	0	0	0
			460	0	0	0
			461	0	0	0
			462	0	0	0
			463	0	0	0
			464	0	0	0
			465	0	0	0
			466	0	0	0
			467	0	0	0
			468	0	0	0
			469	0	0	0
			470	0	0	0
			471	0	0	0
			472	0	0	0
			473	0	0	0
			474	0	0	0
			475	0	0	0
			476	0	0	0
			477	0	0	0
			478	0	0	0
			479	0	0	0
			480	0	0	0
			481	0	0	0
			482	0	0	0
			483	0	0	0
			484	0	0	0
			485	0	0	0
			486	0	0	0
			487	0	0	0
			488	0	0	0
			489	0	0	0
			490	0	0	0
			491	0	0	0
			492	0	0	0
			493	0	0	0
			494	0	0	0
			495	0	0	0
			496	0	0	0
			497	0	0	0
			498	0	0	0
			499	0	0	0
			500	0	0	0
			501	0	0	0
			502	0	0	0
			503	0	0	0
			504	0	0	0
			505	0	0	0
			506	0	0	0
			507	0	0	0
			508	0	0	0
			509	0	0	0
			510	0	0	0
			511	0	0	0
			512	0	0	0
			513	0	0	0
			514	0	0	0
			515	0	0	0
			516	0	0	0
			517	0	0	0
			518	0	0	0
			519	0	0	0
			520	0	0	0
			521	0	0	0
			522	0	0	0
			523	0	0	0
			524	0	0	0
			525	0	0	0
			526	0	0	0
			527	0	0	0
			528	0	0	0
			529	0	0	0
			530	0	0	0
			531	0	0	0
			532	0	0	0
			533	0	0	0
			534	0	0	0
			535	0	0	0
			536	0	0	0
			537	0	0	0
			538	0	0	0
			539	0	0	0
			540	0	0	0
			541	0	0	0
			542	0	0	0
			543	0	0	0
			544	0	0	0
			545	0	0	0
			546	0	0	0
			547	0	0	0
			548	0	0	0
			549	0	0	0
			550	0	0	0
			551	0	0	0
			552	0	0	0
			553	0	0	0
			554	0	0	0
			555	0	0	0
			556	0	0	0
			557	0	0	0
			558	0	0	0
			559	0	0	0
			560	0	0	0
			561	0	0	0
			562	0	0	0
			563	0	0	0
			564	0	0	0
			565	0	0	0
			566	0	0	0
			567	0	0	0
			568	0	0	0
			569	0	0	0
			570	0	0	0
			571	0	0	0
			572	0	0	0
			573	0	0	0
			574	0	0	0
			575	0	0	0
			576	0	0	0
			577	0	0	0
			578	0	0	0
			579	0	0	0
			580	0	0	0
			581	0	0	0
			582	0	0	0
			583	0	0	0
			584	0	0	0
			585	0	0	0
			586	0	0	0
			587	0	0	0
			588	0	0	0
			589	0	0	0
			590	0	0	0
			591	0	0	0
			592	0	0	0
			593	0	0	0
			594	0	0	0
			595	0	0	0
			596	0	0	0
			597	0	0	0
			598	0	0	0
			599	0	0	0
			600	0	0	0
			601	0	0	0
			602	0	0	0
			603	0	0	0
			604	0	0	0
			605	0	0	0
			606	0	0	0
			607	0	0	0
			608	0	0	0
			609	0	0	0
			610	0	0	0
			611	0	0	0
			612	0	0	0
			613	0	0	0
			614	0	0	0
			615	0	0	0
			616	0	0	0
			617	0	0	0
			618	0	0	0
			619	0	0	0
			620	0	0	0
			621	0	0	0
			622	0	0	0
			623	0	0	0
			624	0	0	0
			625	0	0	0
			626	0	0	0
			627	0	0	0
			628	0	0	0
			629	0	0	0
			630	0	0	0
			631	0	0	0
			632	0	0	0
			633	0	0	0
			634	0	0	0
			635	0	0	0
			636	0	0	0
			637	0	0	0
			638	0	0	0
			639	0	0	0
			640	0	0	0
			641	0	0	0
			642	0	0	0
			643	0	0	0
			644	0	0	0
			645	0	0	0
			646	0	0	0
			647	0	0	0
			648	0	0	0
			649	0	0	0
			650	0	0	0
			651	0	0	0
			652	0	0	0
			653	0	0	0
			654	0	0	0
			655	0	0	0
			656	0	0	0
			657	0	0	0
			658	0	0	0
			659	0	0	0
			660	0	0	0
			661	0	0	0
			662	0	0	0
			663	0	0	0
			664	0	0	0
			665	0	0	0
			666	0	0	0
			667	0	0	0
			668	0	0	0
			669	0	0	0
			670	0	0	0
			671	0	0	0
			672	0	0	0
			673	0	0	0
			674	0	0	0
			675	0	0	0
			676	0	0	0
			677	0	0	0
			678	0	0	0
			679	0	0	0
			680	0	0	0
			681	0	0	0
			682	0	0	0
			683	0	0	0
			684	0	0	0
			685	0	0	0
			686	0	0	0
			687	0	0	0
			688	0	0	0
			689	0	0	0
			690	0	0	0
			691	0	0	0
			692	0	0	0
			693	0	0	0
			694	0	0	0
			695	0	0	0
			696	0	0	0
			697	0	0	0
			698	0	0	0
			699	0	0	0
			700	0	0	0
			701	0	0	0
			702	0	0	0
			703	0	0	0
			704	0	0	0
			705	0	0	0
			706	0	0	0
			707	0	0	0
			708	0	0	0
			709	0	0	0
			710	0	0	0
			711	0	0	0
			712	0	0	0
			713	0	0	0
			714	0	0	0
			715	0	0	0
			716	0	0	0
			717	0	0	0
			718	0	0	0
			719	0	0	0
			720	0	0	0
			721	0	0	0
			722	0	0	0
			723	0	0	0
			724	0	0	0
			725	0	0	0
			726	0	0	0
			727	0	0	0
			728	0	0	0
			729	0	0	0
			730	0	0	0
			731	0	0	0
			732	0	0	0
			733	0	0	0
			734	0	0	0
			735	0	0	0
			736	0	0	0
			737	0	0	0
			738	0	0	0
			739	0	0	0
			740	0	0	0
			741	0	0	0
			742	0	0	0
			743	0	0	0
			744	0	0	0
			745	0	0	0
			746	0	0	0
			747	0	0	0
			748	0	0	0
			749	0	0	0
			750	0	0	0
			751	0	0	0
			752	0	0	0
			753	0	0	0
			754	0	0	0
			755	0	0	0
			756	0	0	0
			757	0	0	0
			758	0	0	0
			759	0	0	0
			760	0	0	0
			761	0	0	0
			762	0	0	0
			763	0	0	0
			764	0	0	0
			765	0	0	0
			766	0	0	0
			767	0	0	0
			768	0	0	0
			769	0	0	0
			770	0	0	0
			771	0	0	0
			772	0	0	0
			773	0	0	0
			774	0	0	0
			775	0	0	0
			776	0	0	0
			777	0	0	0
			778	0	0	0
			779	0	0	0
			780	0	0	0
			781	0	0	0
			782	0	0	0
			783	0	0	0
			784	0	0	0
			785	0	0	0
			786	0	0	0
			787	0	0	0
			788	0	0	0
			789	0	0	0
			790	0	0	0
			791	0	0	0
			792	0	0	0
			793	0	0	0
			794	0	0	0
			795	0	0	0
			796	0	0	0
			797	0	0	0
			798	0	0	0
			799	0	0	0
			800	0	0	0
			801	0	0	0
			802	0	0	0
			803	0	0	0
			804	0	0	0
			805	0	0	0
			806	0	0	0
			807	0	0	0
			808	0	0	0
			809	0	0	0
			810	0	0	0
			811	0	0	0
			812	0	0	0
			813	0	0	0
			814	0	0	0
			815	0	0	0
			816	0	0	0
			817	0	0	0
			818	0	0	0
			819	0	0	0
			820	0	0	0
			821	0	0	0
			822	0	0	0
			823	0	0	0
			824	0	0	0
			825	0	0	0
			826	0	0	0
			827	0	0	0
			828	0	0	0
			829	0	0	0
			830	0	0	0
			831	0	0	0
			832	0	0	0
			833	0	0	0
			834	0	0	0
			835	0	0	0
			836	0	0	0
			837	0	0	0
			838	0	0	0
			839	0	0	0
			840	0	0	0
			841	0	0	0
			842	0	0	0
			843	0	0	0
			844	0	0	0
			845	0	0	0
			846	0	0	0
			847	0	0	0
			848	0	0	0
			849	0	0	0
			850	0	0	0
			851	0	0	0
			852	0	0	0
			853	0	0	0
			854	0	0	0
			855	0	0	0
			856	0	0	0
			857	0	0	0
			858	0	0	0
			859	0	0	0
			860	0	0	0
			861	0	0	0
			862	0	0	0
			863	0	0	0
			864	0	0	0
			865	0	0	0
			866	0	0	0
			867	0	0	0
			868	0	0	0
			869	0	0	0
			870	0	0	0
			871	0	0	0
			872	0	0	0
			873	0	0	0
			874	0	0	0
			875	0	0	0
			876	0	0	0
			877	0	0	0
			878	0	0	0
			879	0	0	0
			880	0	0	0
			881	0	0	0
			882	0	0	0
			883	0	0	0
			884	0	0	0
			885	0	0	0
			886	0	0	0
			887	0	0	0
			888	0	0	0
			889	0	0	0
			890	0	0	0
			891	0	0	0
			892	0	0	0
			893	0	0	0
			894	0	0	0
			895	0	0	0
			896	0	0	0
			897	0	0	0
			898	0	0	0
			899	0	0	0
			900	0	0	0
			901	0	0	0
			902	0	0	0
			903	0	0	0
			904	0	0	0
			905	0	0	0
			906	0	0	0
			907	0	0	0
			908	0	0	0
			909	0	0	0
			910	0	0	0
			911	0	0	0
			912	0	0	0
			913	0	0	0
			914	0	0	0
			915	0	0	0
			916	0	0	0
			917	0	0	0
			918	0	0	0
			919	0	0	0
			920	0	0	0
			921	0	0	0
			922	0	0	0
			923	0	0	0
			924	0	0	0
			925	0	0	0
			926	0	0	0
			927	0	0	0
			928	0	0	0
			929	0	0	0
			930	0	0	0
			931	0	0	0
			932	0	0	0
			933	0	0	0
			934	0	0	0
			935	0	0	0
			936	0	0	0
			937	0	0	0
			938	0	0	0
			939	0	0	0
			940	0	0	0
			941	0	0	0
			942	0	0	0
			943	0	0	0
			944	0	0	0
			945	0	0	0
			946	0	0	0
			947	0	0	0
			948	0	0	0
			949	0	0	0
			950	0	0	0
			951	0	0	0
			952	0	0	0
			953	0	0	0
			954	0	0	0
			955	0	0	0
			956	0	0	0
			957	0	0	0
			958	0	0	0
			959	0	0	0
			960	0	0	0
			961	0	0	0
			962	0	0	0
			963	0	0	0
			964	0	0	0
			965	0	0	0
			966	0	0	0
			967	0	0	0
			968	0	0	0
			969	0	0	0
			970	0	0	0
			971	0	0	0
			972	0	0	0
			973	0	0	0
			974	0	0	0
			975	0	0	0
			976	0	0	0
			977	0	0	0
			978	0	0	0
			979	0	0	0
			980	0	0	0
			981	0	0	0
			982	0	0	0
			983	0	0	0
			984	0	0	0
			985	0	0	0
			986	0	0	0
			987	0	0	0
			988	0	0	0
			989	0	0	0
			990	0	0	0
			991	0	0	0
			992	0	0	0
			993	0	0	0
			994	0	0	0
			995	0	0	0
			996	0	0	0
			997	0	0	0
			998	0	0	0
			999	0	0	0
			1000	0	0	0
			1001	0	0	0
			1002	0	0	0
			1003	0	0	0
			1004	0	0	0
			1005	0	0	0
			1006	0	0	0
			1007	0	0	0
			1008	0	0	0
			1009	0	0	0
			1010	0	0	0
			1011	0	0	0
			1012	0	0	0
			1013	0	0	0
			1014	0	0	0
			1015	0	0	0
			1016	0	0	0
			1017	0	0	0
			1018	0	0	0
			1019	0	0	0
			1020	0	0	0
			1021	0	0	0
			1022	0	0	0
			1023	0	0	0
			1024	0	0	0
			1025	0	0	0
			1026	0	0	0
			1027	0	0	0
			1028	0	0	0
			1029	0	0	0
			1030	0	0	0
			1031	0	0	0
			1032	0	0	0
			1033	0	0	0
			1034	0	0	0
			1035	0	0	0
			1036	0	0	0
			1037	0	0	0
			1038	0	0	0
			1039	0	0	0
			1040	0	0	0
			1041	0	0	0
			1042	0	0	0
			1043	0	0	0
			1044	0	0	0
			1045	0	0	0
			1046	0	0	0
			1047	0	0	0
			1048	0	0	0
			1049	0	0	0
			1050	0	0	0
			1051	0	0	0
			1052	0	0	0
			1053	0	0	0
			1054	0	0	0
			1055	0	0	0
			1056	0	0	0
			1057	0	0	0
			1058	0	0	0
			1059	0	0	0
			1060	0	0	0
			1061	0	0	0
			1062	0	0	0
			1063	0	0	0
			1064	0	0	0
			1065	0	0	0
			1066	0	0	0
			1067	0	0	0
			1068	0	0	0
			1069	0	0	0
			1070	0	0	0
			1071	0	0	0
			1072	0	0	0
			1073	0	0	0
			1074	0	0	0
			1075	0	0	0
			1076	0	0	0
			1077	0	0	0
			1078	0	0	0
			1079	0	0	0
			1080	0	0	0
			1081	0	0	0
			1082	0	0	0
			1083	0	0	0
			1084	0	0	0
			1085	0	0	0
			1086	0	0	0
			1087	0	0	0
			1088	0	0	0
			1089	0	0	0
			1090	0	0	0
			1091	0	0	0
			1092	0	0	0
			1093	0	0	0
			1094	0	0	0
			1095	0	0	0
			1096	0	0	0
			1097	0	0	0
			1098	0	0	0
			1099	0	0	0
			1100	0	0	0
			1101	0	0	0
			1102	0	0	0
			1103	0	0	0
			1104	0	0	0
			1105	0	0	0
			1106	0	0	0
			1107	0	0	0
			1108	0	0	0
			1109	0	0	0
			1110	0	0	0
			1111	0	0	0
			1112	0	0	0
			1113	0	0	0
			1114	0	0	0
			1115	0	0	0
			1116	0	0	0
			1117	0	0	0
			1118	0	0	0
			1119	0	0	0
			1120	0	0	0
			1121	0	0	0
			1122	0	0	0
			1123	0	0	0
			1124	0	0	0
			1125	0	0	0
			1126	0	0	0
			1127	0	0	0
			1128	0	0	0
			1129	0	0	0
			1130	0	0	0
			1131	0	0	0
			1132	0	0	0
			1133	0	0	0
			1134	0	0	0
			1135	0	0	0
			1136	0	0	0
			1137	0	0	0
			1138	0	0	0
			1139	0	0	0
			1140	0	0	0
			1141	0	0	0
			1142	0	0	0
			1143	0	0	0
			1144	0	0	0
			1145	0	0	0
			1146	0	0	0
			1147	0	0	0
			1148	0	0	0
			1149	0	0	0
			1150	0	0	0
			1151	0	0	0
			1152	0	0	0
			1153	0	0	0
			1154	0	0	0
			1155	0	0	0
			1156	0	0	0
			1157	0	0	0
			1158	0	0	0
			1159	0	0	0
			1160	0	0	0
			1161	0	0	0
			1162	0	0	0
			1163	0	0	0
			1164	0	0	0
			1165	0	0	0
			1166	0	0	0
			1167	0	0	0
			1168	0	0	0
			1169	0	0	0
			1170	0	0	0
			1171	0	0	0
			1172	0	0	0
			1173	0	0	0
			1174	0	0	0
			1175	0	0	0
			1176	0	0	0
			1177	0	0	0
			1178	0	0	0
			1179	0	0	0
			1180	0	0	0
			1181	0	0	0
			1182	0	0	0
			1183	0	0	0
			1184	0	0	0
			1185	0	0	0
			1186	0	0	0
			1187	0	0	0
			1188	0	0	0
			1189	0	0	0
			1190	0	0	0
			1191	0	0	0
			1192	0	0	0
			1193	0	0	0
			1194	0	0	0
			1195	0	0	0
			1196	0	0	0
			1197	0	0	0
			1198	0	0	0
			1199	0	0	0
			1200	0	0	0
			1201	0	0	0
			1202	0	0	0
			1203	0	0	0
			1204	0	0	0
			1205	0	0	0
			1206	0	0	0
			1207	0	0	0
			1208	0	0	0
			1209	0	0	0
			1210	0	0	0
			1211	0	0	0
			1212	0	0	0
			1213	0	0	0
			1214	0	0	0
			1215	0	0	0
			1216	0	0	0
			1217	0	0	0
			1218	0	0	0
			1219	0	0	0
			1220	0	0	0
			1221	0	0	0
			1222	0	0	0
			1223	0	0	0
			1224	0	0	0
			1225	0	0	0
			1226	0	0	0
			1227	0	0	0
			1228	0	0	0
			1229	0	0	0
			1230	0	0	0
			1231	0	0	0
			1232	0	0	0
			1233	0	0	0
			1234	0	0	0
			1235	0	0	0
			1236	0	0	0
			1237	0	0	0
			1238	0	0	0
			1239	0	0	0
			1240	0	0	0
			1241	0	0	0
			1242	0	0	0
			1243	0	0	0
			1244	0	0	0
			1245	0	0	0
			1246	0	0	0
			1247	0	0	0
			1248	0	0	0
			1249	0	0	0
			1250	0	0	0
			1251	0	0	0
			1252	0	0	0
			1253	0	0	0
			1254	0	0	0
			1255	0	0	0
			1256	0	0	0
			1257	0	0	0
			1258	0	0	0
			1259	0	0	0
			1260	0	0	0
			1261	0	0	0
			1262	0	0	0
			1263	0	0	0
			1264	0	0	0
			1265	0	0	0
			1266	0	0	0
			1267	0	0	0
			1268	0	0	0
			1269	0	0	0
			1270	0	0	0
			1271	0	0	0
			1272	0	0	0
			1273	0	0	0
			1274	0	0	0
			1275	0	0	0
			1276	0	0	0
			1277	0	0	0
			1278	0	0	0
			1279	0	0	0
			1280	0	0	0
			1281	0	0	0
			1282	0	0	0
			1283	0	0	0
			1284	0	0	0
			1285	0	0	0
			1286	0	0	0
			1287	0	0	0
			1288	0	0	0
			1289	0	0	0
			1290	0	0	0
			1291	0	0	0
			1292	0	0	0
			1293	0	0	0
			1294	0	0	0
			1295	0	0	0
			1296	0	0	0
			1297	0	0	0
			1298	0	0	0
			1299	0	0	0
			1300	0	0	0
			1301	0	0	0
			1302	0	0	0
			1303	0	0	0
			1304	0	0	0
			1305	0	0	0
			1306	0	0	0
			1307	0	0	0
			1308	0	0	0
			1309	0	0	0
			1310	0	0	0
			1311	0	0	0
			1312	0	0	0
			1313	0	0	0
			1314	0	0	0
			1315	0	0	0
			1316	0	0	0
			1317	0	0	0
			1318	0	0	0
			1319	0	0	0
			1320	0	0	0
			1321	0	0	0
			1322	0	0	0
			1323	0	0	0
			1324	0	0	0
			1325	0	0	0
			1326	0	0	0
			1327	0	0	0
			1328	0	0	0
			1329	0	0	0
			1330	0	0	0
			1331	0	0	0
			1332	0	0	0
			1333	0	0	0
			1334	0	0	0
			1335	0	0	0
			1336	0	0	0
			1337	0	0	0
			1338	0	0	0
			1339	0	0	0
			1340	0	0	0
			1341	0	0	0
			1342	0	0	0
			1343	0	0	0
			1344	0	0	0
			1345	0	0	0
			1346	0	0	0
			1347	0	0	0
			1348	0	0	0
			1349	0	0	0
			1350	0	0	0
			1351	0	0	0
			1352	0	0	0
			1353	0	0	0
			1354	0	0	0
			1355	0	0	0
			1356	0	0	0
			1357	0	0	0
			1358	0	0	0
			1359	0	0	0
			1360	0	0	0
			1361	0	0	0
			1362	0	0	0
			1363	0	0	0
			1364	0	0	0
			1365	0	0	0
			1366	0	0	0
			1367	0	0	0
			1368	0	0	0
			1369	0	0	0
			1370	0	0	0
			1371	0	0	0
			1372	0	0	0
			1373	0	0	0
			1374	0	0	0
			1375	0	0	0
			1376	0	0	0
			1377	0	0	0
			1378	0	0	0
			1379	0	0	0
			1380	0	0	0
			1381	0	0	0
			1382	0	0	0
			1383	0	0	0
			1384	0	0	0
			1385	0	0	0
			1386	0	0	0
			1387	0	0	0
			1388	0	0	0
			1389	0	0	0
			1390	0	0	0
			1391	0	0	0
			1392	0	0	0
			1393	0	0	0
			1394	0	0	0
			1395	0	0	0
			1396	0	0	0
			1397	0	0	0
			1398	0	0	0
			1399	0	0	0
			1400	0	0	0
			1401	0	0	0
			1402	0	0	0
			1403	0	0	0
			1404	0	0	0
			1405	0	0	0
			1406	0	0	0
			1407	0	0	0
			1408	0	0	0
			1409	0	0	0
			1410	0	0	0
			1411	0	0	0
			1412	0	0	0
			1413	0	0	0
			1414	0	0	0
			1415	0	0	0
			1416	0	0	0
			1417	0	0	0
			1418	0	0	0
			1419	0	0	0
			1420	0	0	0
			1421	0	0	0
			1422	0	0	0
			1423	0	0	0
			1424	0	0	0
			1425	0	0	0
			1426	0	0	0
			1427	0	0	0
			1428	0	0	0
			1429	0	0	0
			1430	0	0	0
			1431	0	0	0
			1432	0	0	0
			1433	0	0	0
			1434	0	0	0
			1435	0	0	0
			1436	0	0	0
			1437	0	0	0
			1438	0	0	0
			1439	0	0	0
			1440	0	0	0
			1441	0	0	0
			1442	0	0	0
			1443	0	0	0
			1444	0	0	0
			1445	0	0	0
			1446	0	0	0
			1447	0	0	0
			1448	0	0	0
			1449	0	0	0
			1450	0	0	0
			1451	0	0	0
			1452	0	0	0
			1453	0	0	0
			1454	0	0	0
			1455	0	0	0
			1456	0	0	0
			1457	0	0	0
			1458	0	0	0
			1459	0	0	0
			1460	0	0	0
			1461	0	0	0
			1462	0	0	0
			1463	0	0	0
			1464	0	0	0
			1465	0	0	0
			1466	0	0	0
			1467	0	0	0
			1468	0	0	0
			1469	0	0	0
			1470	0	0	0
			1471	0	0	0
			1472	0	0	0
			1473	0	0	0
			1474	0	0	0
			1475	0	0	0
			1476	0	0	0
			1477	0	0	0
			1478	0	0	0
			1479	0	0	0
			1480	0	0	0
			1481	0	0	0
			1482	0	0	0
			1483	0	0	0
			1484	0	0	0
			1485	0	0	0
			1486	0	0	0
			1487	0	0	0
			1488	0	0	0
			1489	0	0	0
			1490	0	0	0
			1491	0	0	0
			1492	0	0	0
			1493	0	0	0
			1494	0	0	0
			1495	0	0	0
			1496	0	0	0
			1497	0	0	0
			1498	0	0	0
			1499	0	0	0
			1500	0	0	0
			1501	0	0	0
			1502	0	0	0
			1503	0	0	0
			1504	0	0	0
			1505	0	0	0
			1506	0	0	0
			1507	0	0	0
			1508	0	0	0
			1509	0	0	0
			1510	0	0	0
			1511	0	0	0
			1512	0	0	0
			1513	0	0	0
			1514	0	0	0
			1515	0	0	0
			1516	0	0	0
			1517	0	0	0
			1518	0	0	0
			1519	0	0	0
			1520	0	0	0
			1521	0	0	0
			1522	0	0	0
			1523	0	0	0
			1524	0	0	0
			1525	0	0	0
			1526	0	0	0
			1527	0	0	0
			1528	0	0	0
			1529	0	0	0
			1530	0	0	0
			1531	0	0	0
			1532	0	0	0
			1533	0	0	0
			1534	0	0	0
			1535	0	0	0
			1536	0	0	0
			1537	0	0	0
			1538	0	0	0
			1539	0	0	0
			1540	0	0	0
			1541	0	0	0
			1542	0	0	0
			1543	0	0	0
			1544	0	0	0
			1545	0	0	0
			1546	0	0	0
			1547	0	0	0
			1548	0	0	0
			1549	0	0	0
			1550	0	0	0
			1551	0	0	0
			1552	0	0	0
			1553	0	0	0
			1554	0	0	0
			1555	0	0	0
			1556	0	0	0
			1557	0	0	0
			1558	0	0	0
			1559	0	0	0
			1560	0	0	0
			1561	0	0	0
			1562	0	0	0
			1563	0	0	0
			1564	0	0	0
			1565	0	0	0
			1566	0	0	0
			1567	0	0	0
			1568	0	0	0
			1569	0	0	0
			1570	0	0	0
			1571	0	0	0
			1572	0	0	0
			1573	0	0	0
			1574	0	0	0
			1575	0	0	0
			1576	0	0	0
			1577	0	0	0
			1578	0	0	0
			1579	0	0	0
			1580	0	0	0
			1581	0	0	0
			1582	0	0	0
			1583	0	0	0
			1584	0	0	0
			1585	0	0	0
			1586	0	0	0
			1587	0	0	0
			1588	0	0	0
			1589	0	0	0
			1590	0	0	0
			1591	0	0	0
			1592	0	0	0
			1593	0	0	0
			1594	0	0	0
			1595	0	0	0
			1596	0	0	0
			1597	0	0	0
			1598	0	0	0
			1599	0	0	0
			1600	0	0	0
			1601	0	0	0
			1602	0	0	0
			1603	0	0	0
			1604	0	0	0
			1605	0	0	0
			1606	0	0	0
			1607	0	0	0
			1608	0	0	0
			1609	0	0	0
			1610	0	0	0
			1611	0	0	0
			1612	0	0	0
			1613	0	0	0
			1614	0	0	0
			1615	0	0	0
			1616	0	0	0
			1617	0	0	0
			1618	0	0	0
			1619	0	0	0
			1620	0	0	0
			1621	0	0	0
			1622	0	0	0
			1623	0	0	0
			1624	0	0	0
			1625	0	0	0
			1626	0	0	0
			1627	0	0	0
			1628	0	0	0
			1629	0	0	0
			1630	0	0	0
			1631	0	0	0
			1632	0	0	0
			1633	0	0	0
			1634	0	0	0
			1635	0	0	0
			1636	0	0	0
			1637	0	0	0
			1638	0	0	0
			1639	0	0	0
			1640	0	0	0
			1641	0	0	0
			1642	0	0	0
			1643	0	0	0
			1644	0	0	0
			1645	0	0	0
			1646	0	0	0
			1647	0	0	0
			1648	0	0	0
			1649	0	0	0
			1650	0	0	0
			1651	0	0	0
			1652	0	0	0
			1653	0	0	0
			1654	0	0	0
			1655	0	0	0
			1656	0	0	0
			1657	0	0	0
			1658	0	0	0
			1659	0	0	0
			1660	0	0	0
			1661	0	0	0
			1662	0	0	0
			1663	0	0	0
			1664	0	0	0
			1665	0	0	0
			1666	0	0	0
			1667	0	0	0
			1668	0	0	0
			1669	0	0	0
			1670	0	0	0
			1671	0	0	0
			1672	0	0	0
			1673	0	0	0
			1674	0	0	0
			1675	0	0	0
			1676	0	0	0
			1677	0	0	0
			1678	0	0	0
			1679	0	0	0
			1680	0	0	0
			1681	0	0	0
			1682	0	0	0
			1683	0	0	0
			1684	0	0	0
			1685	0	0	0
			1686	0	0	0
			1687	0	0	0
			1688	0	0	0
			1689	0	0	0
			1690	0	0	0
			1691	0	0	0
			1692	0	0	0
			1693	0	0	0
			1694	0	0	0
			1695	0	0	0
			1696	0	0	0
			1697	0	0	0
			1698	0	0	0
			1699	0	0	0
			1700	0	0	0
			1701	0	0	0
			1702	0	0	0
			1703	0	0	0
			1704	0	0	0
			1705	0	0	0
			1706	0	0	0
			1707	0	0	0
			1708	0	0	0
			1709	0	0	0
			1710	0	0	0
			1711	0	0	0
			1712	0	0	0
			1713	0	0	0
			1714	0	0	0
			1715	0	0	0
			1716	0	0	0
			1717	0	0	0
			1718	0	0	0
			1719	0	0	0
			1720	0	0	0
			1721	0	0	0
			1722	0	0	0
			1723	0	0	0
			1724	0	0	0
			1725	0	0	0
			1726	0	0	0
			1727	0	0	0
			1728	0	0	0
			1729	0	0	0
			1730	0	0	0
			1731	0	0	0
			1732	0	0	0
			1733	0	0	0
			1734	0	0	0
			1735	0	0	0
			1736	0	0	0
			1737	0	0	0
			1738	0	0	0
			1739	0	0	0
			1740	0	0	0
			1741	0	0	0
			1742	0	0	0
			1743	0	0	0
			1744	0	0	0
			1745	0	0	0
			1746	0	0	0
			1747	0	0	0
			1748	0	0	0
			1749	0	0	0
			1750	0	0	0
			1751	0	0	0
			1752	0	0	0
			1753	0	0	0
			1754	0	0	0
			1755	0	0	0
			1756	0	0	0
			1757	0	0	0
			1758	0	0	0
			1759	0	0	0
			1760	0	0	0
			1761	0	0	0
			1762	0	0	0
			1763	0	0	0
			1764	0	0	0
			1765	0	0	0
			1766	0	0	0
			1767	0	0	0
			1768	0	0	0
			1769	0	0	0
			1770	0	0	0
			1771	0	0	0
			1772	0	0	0
			1773	0	0	0
			1774	0	0	0
			1775	0	0	0
			1776	0	0	0
			1777	0	0	0
			1778	0	0	0
			1779	0	0	0
			1780	0	0	0
			1781	0	0	0
			1782	0	0	0
			1783	0	0	0
			1784	0	0	0
			1785	0	0	0
			1786	0	0	0
			1787	0	0	0
			1788	0	0	0
			1789	0	0	0
			1790	0	0	0
			1791	0	0	0
			1792	0	0	0
			1793	0	0	0
			1794	0	0	0
			1795	0	0	0
			1796	0	0	0
			1797	0	0	0
			1798	0	0	0
			1799	0	0	0
			1800	0	0	0
			1801	0	0	0
			1802	0	0	0
			1803	0	0	0
			1804	0	0	0
			1805	0	0	0
			1806	0	0	0
			1807	0	0	0
			1808	0	0	0
			1809	0	0	0
			1810	0	0	0
			1811	0	0	0
			1812	0	0	0
			1813	0	0	0
			1814	0	0	0
			1815	0	0	0
			1816	0	0	0
			1817	0	0	0
			1818	0	0	0
			1819	0	0	0
			1820	0	0	0
			1821	0	0	0
			1822	0	0	0
			1823	0	0	0
			1824	0	0	0
			1825	0	0	0
			1826	0	0	0
			1827	0	0	0
			1828	0	0	0
			1829	0	0	0
			1830	0	0	0
			1831	0	0	0
			1832	0	0	0
			1833	0	0	0
			1834	0	0	0
			1835	0	0	0
			1836	0	0	0
			1837	0	0	0
			1838	0	0	0
			1839	0	0	0
			1840	0	0	0
			1841	0	0	0
			1842	0	0	0
			1843	0	0	0
			1844	0	0	0
			1845	0	0	0
			1846	0	0	0
			1847	0	0	0
			1848	0	0	0
			1849	0	0	0
			1850	0	0	0
			1851	0	0	0
			1852	0	0	0
			1853	0	0	0
			1854	0	0	0
			1855	0	0	0
			1856	0	0	0
			1857	0	0	0
			1858	0	0	0
			1859	0	0	0
			1860	0	0	0
			1861	0	0	0
			1862	0	0	0
			1863	0	0	0
			1864	0	0	0
			1865	0	0	0
			1866	0	0	0
			1867	0	0	0
			1868	0	0	0
			1869	0	0	0
			1870	0	0	0
			1871	0	0	0
			1872	0	0	0
			1873	0	0	0
			1874	0	0	0
			1875	0	0	0
			1876	0	0	0
			1877	0	0	0
			1878	0	0	0
			1879	0	0	0
			1880	0	0	0
			1881	0	0	0
			1882	0	0	0
			1883	0	0	0
			1884	0	0	0
			1885	0	0	0
			1886	0	0	0
			1887	0	0	0
			1888	0	0	0
			1889	0	0	0
			1890	0	0	0
			1891	0	0	0
			1892	0	0	0
			1893	0	0	0
			1894	0	0	0
			1895	0	0	0
			1896	0	0	0
			1897	0	0	0
			1898	0	0	0
			1899	0	0	0
			1900	0	0	0
			1901	0	0	0
			1902	0	0	0
			1903	0	0	0
			1904	0	0	0
			1905	0	0	0
			1906	0	0	0
			1907	0	0	0
			1908	0	0	0
			1909	0	0	0
			1910	0	0	0
			1911	0	0	0
			1912	0	0	0
			1913	0	0	0
			1914	0	0	0
			1915	0	0	0
			1916	0	0	0
			1917	0	0	0
			1918	0	0	0
			1919	0	0	0
			1920	0	0	0
			1921	0	0	0
			1922	0	0	0
			1923	0	0	0
			1924	0	0	0
			1925	0	0	0
			1926	0	0	0
			1927	0	0	0
			1928	0	0	0
			1929	0	0	0
			1930	0	0	0
			1931	0	0	0
			1932	0	0	0
			1933	0	0	0
			1934	0	0	0
			1935	0	0	0
			1936	0	0	0
			1937	0	0	0
			1938	0	0	0
			1939	0	0	0
			1940	0	0	0
			1941	0	0	0
			1942	0	0	0
			1943	0	0	0
			1944	0	0	0
			1945	0	0	0
			1946	0	0	0
			1947	0	0	0
			1948	0	0	0
			1949	0	0	0
			1950	0	0	0
			1951	0	0	0
			1952	0	0	0
			1953	0	0	0
			1954	0	0	0
			1955	0	0	0
			1956	0	0	0
			1957	0	0	0
			1958	0	0	0
			1959	0	0	0
			1960	0	0	0
			1961	0	0	0
			1962	0	0	0
			1963	0	0	0
			1964	0	0	0
			1965	0	0	0
			1966	0	0	0
			1967	0	0	0
			1968	0	0	0
			1969	0	0	0
			1970	0	0	0
			1971	0	0	0
			1972	0	0	0
			1973	0	0	0
			1974	0	0	0
			1975	0	0	0
			1976	0	0	0
			1977	0	0	0
			1978	0	0	0
			1979	0	0	0
			1980	0	0	0
			1981	0	0	0
			1982	0	0	0
			1983	0	0	0
			1984	0	0	0
			1985	0	0	0
			1986	0	0	0
			1987	0	0	0
			1988	0	0	0
			1989	0	0	0
			1990	0	0	0
			1991	0	0	0
			1992	0	0	0
			1993	0	0	0
			1994	0	0	0
			1995	0	0	0
[truncated: 8,336 more rows]

## Sheet: Results(Death time)
Input Male(M) or Female(F)	Male or Femal:
	1	1	2	3	4	5	6	7	8	9	10	11	12	13	14	15	16	17	18	19	20	21	22	23	24	2	1	2	3	4	5	6	7	8	9	10	11	12	13	14	15	16	17	18	19	20	21	22	23
	A																									A
	B																									B
	C																									C
	D																									D
	E																									E
	F																									F
	G																									G
	H																									H
	I																									I
	J																									J
	K																									K
	L																									L
	M																									M
	N																									N
	O																									O
	P																									P
File number (Result by DIAMonDs.py )	2.Death of adult
	1	1	2	3	4	5	6	7	8	9	10	11	12	13	14	15	16	17	18	19	20	21	22	23	24	2	1	2	3	4	5	6	7	8	9	10	11	12	13	14	15	16	17	18	19	20	21	22	23
	A																									A
	B																									B
	C																									C
	D																									D
	E																									E
	F																									F
	G																									G
	H																									H
	I																									I
	J																									J
	K																									K
	L																									L
	M																									M
	N																									N
	O																									O
	P																									P
Results of death timing	VLOOKUP(検索値,範囲,列番号,検索の型)
	2.Deth (adult)				2: Minuts, 3: Hours or 4: Days					3
	1	1	2	3	4	5	6	7	8	9	10	11	12	13	14	15	16	17	18	19	20	21	22	23	24	2	1	2	3	4	5	6	7	8	9	10	11	12	13	14	15	16	17	18	19	20	21	22	23
	A																									A
	B																									B
	C																									C
	D																									D
	E																									E
	F																									F
	G																									G
	H																									H
	I																									I
	J																									J
	K																									K
	L																									L
	M																									M
	N																									N
	O																									O
	P																									P
Male	♂:
	1	1	2	3	4	5	6	7	8	9	10	11	12	13	14	15	16	17	18	19	20	21	22	23	24	2	1	2	3	4	5	6	7	8	9	10	11	12	13	14	15	16	17	18	19	20	21	22	23
	A																									A
	B																									B
	C																									C
	D																									D
	E																									E
	F																									F
	G																									G
	H																									H
	I																									I
	J																									J
	K																									K
	L																									L
	M																									M
	N																									N
	O																									O
	P																									P
Female	♀:
	1	1	2	3	4	5	6	7	8	9	10	11	12	13	14	15	16	17	18	19	20	21	22	23	24	2	1	2	3	4	5	6	7	8	9	10	11	12	13	14	15	16	17	18	19	20	21	22	23
	A																									A
	B																									B
	C																									C
	D																									D
	E																									E
	F																									F
	G																									G
	H																									H
	I																									I
	J																									J
	K																									K
	L																									L
	M																									M
	N																									N
	O																									O
	P																									P
[truncated: 26 more columns]
